# Supplementary material for: Cohort studies on 71 outcomes among people with atopic eczema in UK primary care data
Source: PubMed Central journal article supplement (PMC11541564; doi:10.1038/s41467-024-54035-1), 2024-11-06
Supplement: 41467_2024_54035_MOESM1_ESM.pdf [file 41467_2024_54035_MOESM1_ESM.pdf]

## Supplementary information for “Cohort studies on 71 outcomes among people with atopic eczema in UK primary care data”

### Supplementary Notes 1: Results by category

#### Atopic and allergic diseases

Of all outcomes, eczema was most strongly associated (i.e., the largest adjusted hazard ratio) with **food allergy** (adjusted HR [aHR] 4.03 [3.95-4.11]; rate difference per 1,000 person-years [RD] 1.48). There were strong associations with **allergic conjunctivitis** (aHR 2.01 [1.98-2.04]; RD 1.1), **asthma** (aHR 1.87 [1.86-1.89]; RD 5.4), and **allergic rhinitis** (aHR 1.92 [1.90-1.93]; RD 5.3), with asthma and allergic rhinitis having the largest rate differences of all outcomes. There was also a strong association with **eosinophilic oesophagitis**, however with wider confidence intervals and a small rate difference (aHR 1.64 [1.42-1.90]; RD 0.0).

Effect sizes decreased with cohort age cut-off for food allergy (<18: 5.30 [5.18-5.43]; any age: 4.03 [3.95-4.11]; 18+: 2.00 [1.94-2.07]; 40+: 1.64 [1.56-1.72]), asthma (<18: 2.11 [2.09-2.13]; any age: 1.87 [1.86-1.89]; 18+: 1.56 [1.54-1.58]; 40+: 1.44 [1.42-1.46]), and allergic rhinitis (<18: 2.11 [2.09-2.13]; any age: 1.92 [1.90-1.93]; 18+: 1.64 [1.63-1.66]; 40+: 1.57 [1.55-1.59]). For all outcomes in this category HRs were attenuated in analyses excluding non-consulters (e.g., for food allergy 3.29 [3.17-3.41]), however evidence for associations remained strong.

Evidence for a dose-response relationship with eczema severity was stronger for food allergy (e.g., additionally hospital-admission-adjusted aHR mild 3.66 [3.59-3.75]; mod. 4.19 [4.06-4.32]; sev. 5.72 [4.81-6.80]) and allergic conjunctivitis (mild 1.80 [1.77-1.83]; mod. 2.16 [2.12-2.21]; sev. 2.43 [2.14-2.77]), than it was for asthma (mild 1.75 [1.74-1.77]; mod. 1.84 [1.82-1.86]; sev. 1.87 [1.75-2.00]), allergic rhinitis (mild 1.82 [1.80-1.83]; mod. 1.94 [1.92-1.96]; sev. 1.93 [1.80-2.07]) and eosinophilic oesophagitis (where CIs overlapped the null).

#### Immune mediated diseases

Eczema was strongly associated with **alopecia areata** (aHR 1.77 [1.71-1.83]; RD 0.18) and **urticaria** (aHR 1.58 [1.57-1.60]; RD 1.87). There was also an association with **chronic obstructive pulmonary disease (COPD)** (aHR 1.22 [1.20-1.23]; RD 1.15).

Effect sizes increased with cohort age cut-off for alopecia areata (<18: 1.61 [1.53-1.69]; any age: 1.77 [1.71-1.83]; 18+: 1.76 [1.69-1.83]; 40+: 1.87 [1.76-1.99]) and urticaria (<18: 1.38 [1.36-1.40]; any age: 1.58 [1.57-1.60]; 18+: 1.77 [1.75-1.80]; 40+: 1.85 [1.82-1.88]). Effect estimates were also larger when using the more severe cohort instead of the any-age cohort for alopecia areata (2.12 [2.03-2.22]) and urticaria (1.71 [1.69-1.74]). For all outcomes in this category, HRs were attenuated in analyses excluding non-consulters (e.g., for alopecia areata aHR 1.60 [1.51-1.70]), however evidence for associations remained strong.

For alopecia areata and urticaria, HRs were larger in moderate eczema than mild eczema, but not larger in severe eczema than moderate eczema (e.g., for alopecia areata: additionally hospital-admission-adjusted aHR mild 1.45 [1.38-1.51]; mod. 2.16 [2.06-2.26]; sev. 2.18 [1.69-2.81]). For COPD we saw a dose-response relationship with eczema severity (mild 1.11 [1.08-1.13]; mod. 1.16 [1.14-1.18]; sev. 1.45 [1.33-1.58]).

### Skin infection

Eczema was strongly associated with **molluscum contagiosum** (aHR 1.81 [1.79-1.83]; RD 1.85), **impetigo** (aHR 1.49 [1.48-1.51]; RD 2.08), **herpes simplex** (aHR 1.51 [1.49-1.53]; RD 0.94), **dermatophyte infection** (aHR 1.60 [1.59-1.61]; RD 3.75), and **cutaneous warts** (aHR 1.30 [1.29-1.31]; RD 3.04), with rate differences larger than in any other category except atopic and allergic conditions.

While effect estimates were attenuated when using the older cohorts instead of the any age cohort for molluscum contagiosum (18+ aHR 1.56 [1.47-1.65]; 40+ aHR 1.65 [1.50-1.82]), they were increased for impetigo (18+ aHR 1.67 [1.64-1.70]; 40+ aHR 1.70 [1.66-1.75]) and were not considerably changed for herpes simplex and cutaneous warts. Effect estimates were attenuated for dermatophyte infection when using the <18 cohort (aHR 1.45 [1.43-1.46]). For all outcomes in this category HRs were attenuated in analyses excluding non-consulters (e.g., for molluscum contagiosum 1.69 [1.64-1.74]), however evidence for associations remained strong.

Evidence for dose response relationships with eczema severity was stronger for molluscum contagiosum (additionally hospital-admission-adjusted aHR mild 1.76 [1.74-1.78]; mod. 2.01 [1.96-2.06]; sev. 2.17 [1.84-2.55]), impetigo and herpes simplex than it was for dermatophyte infection (mild 1.49 [1.47-1.50]; mod. 1.62 [1.61-1.64]; sev. 1.41 [1.33-1.50]) and cutaneous warts.

### Liver diseases

Eczema was associated with **autoimmune liver disease** (aHR 1.32 [1.21-1.43]; RD 0.01), **fibrosis/sclerosis/cirrhosis** (aHR 1.26 [1.21-1.32]; RD 0.09), **fatty liver** (aHR 1.24 [1.22-1.26]; RD 0.28), **oesophageal varices** (aHR 1.19 [1.10-1.30]; RD 0.02), and to a lesser extent with **cholecystitis** (aHR 1.10 [1.07-1.14]; RD 0.05), with relatively low rate differences for all outcomes in this category.

Effect estimates were somewhat increased when using the more severe cohort for autoimmune liver disease (aHR 1.40 [1.27-1.56]), fibrosis/sclerosis/cirrhosis (aHR 1.33 [1.27-1.40]) and oesophageal varices (aHR 1.38 [1.25-1.52]). For all outcomes in this category HRs were attenuated in analyses excluding non-consulters; while for fibrosis/sclerosis/cirrhosis there was only a small attenuation (aHR 1.23 [1.16-1.31]), there were larger attenuations for autoimmune liver disease (1.20 [1.07-1.34]) and fatty liver (1.14 [1.11-1.16]), and for oesophageal varices and cholecystitis the lower bounds of the 99% confidence intervals were at, or close to, the null.

Effect estimates were considerably larger in severe eczema than mild or moderate eczema for autoimmune liver disease (additionally hospital-admission-adjusted aHR mild 1.02 [0.89-1.16]; mod. 1.14 [1.02-1.27]; sev. 5.32 [3.46-8.18]), fatty liver, fibrosis/sclerosis/cirrhosis, and oesophageal varices, but not for cholecystitis (mild 0.93 [0.89-0.97]; mod. 0.96 [0.93-0.99]; sev. 1.09 [0.93-1.28]).

### Digestive system – inflammatory bowel diseases

Eczema was strongly associated with **Crohn's disease** (aHR 1.62 [1.54-1.69]; RD 0.09), and **ulcerative colitis** (aHR 1.40 [1.34-1.46]; RD 0.08).

For Crohn's disease, but not for ulcerative colitis, using the other cohorts changed estimates, however confidence intervals from different cohorts overlapped (any age aHR 1.62 [1.54-1.69]; 18+ aHR 1.54 [1.46-1.61]; 40+ aHR 1.41 [1.32-1.50]; <18 aHR 1.82 [1.67-1.97]; more severe aHR 1.64 [1.55-1.74]). For both outcomes HRs were attenuated in analyses excluding non-consulters (e.g., for Crohn's disease 1.38 [1.28-1.48]), however evidence for associations remained strong.

Effect estimates were considerably larger in severe eczema than mild or moderate eczema for both Crohn's disease (additionally hospital-admission-adjusted aHR mild 1.14 [1.06-1.22]; mod. 1.29 [1.20-1.38]; sev. 4.92 [3.74-6.47]) and ulcerative colitis (mild 1.12 [1.06-1.19]; mod. 1.19 [1.12-1.25]; sev. 2.62 [2.08-3.31]).

#### Digestive system – diseases of the oesophagus

Eczema was associated with **oesophagitis** (aHR 1.25 [1.23-1.27]; RD 0.48), **gastro oesophageal reflux** (aHR 1.25 [1.24-1.26]; RD 1.10), and to a lesser extent with **Barrett's oesophagus** (aHR 1.16 [1.12-1.20]; RD 0.08).

Using the other cohorts caused little change in effect estimates, except an attenuation in the <18 cohort for oesophagitis (1.16 [1.13-1.19]). HRs were attenuated when excluding non-consulters.

There was some evidence for a dose-response relationship with eczema severity for oesophagitis (additionally hospital-admission-adjusted aHR mild 1.11 [1.09-1.13]; mod. 1.14 [1.12-1.16]; sev. 1.26 [1.15-1.37]), but not gastro oesophageal reflux or Barrett's oesophagus.

#### Digestive system – other

Eczema was strongly associated with **coeliac disease** (aHR 1.42 [1.37-1.47]; RD 0.10) and **irritable bowel syndrome** (aHR 1.31 [1.29-1.32]; RD 0.67). Eczema was also associated with **gastritis and duodenitis** (aHR 1.21 [1.20-1.23]; RD 0.60), and to a lesser extent with **diverticular disease** (aHR 1.17 [1.15-1.18]; RD 0.64), **peptic ulcer disease** (aHR 1.16 [1.13-1.19]; RD 0.08), **abdominal hernia** (aHR 1.13 [1.12-1.15]; RD 0.30) and **pancreatitis** (aHR 1.11 [1.07-1.15]; RD 0.03). Eczema was only weakly associated with **peritonitis** (aHR 1.07 [1.00-1.13]; RD 0.01) and **appendicitis** (aHR 1.07 [1.05-1.09]; RD 0.06).

Using the other cohorts caused little change in effect estimates, except attenuated HRs in the <18 cohort for coeliac disease (1.34 [1.26-1.42]), irritable bowel syndrome (1.22 [1.19-1.25]), and abdominal hernia (1.05 [1.01-1.09]). For all outcomes in this category HRs were attenuated in analyses excluding non-consulters; while for some outcomes evidence remained strong (e.g., coeliac disease aHR 1.33 [1.25-1.40]), for pancreatitis, appendicitis, and peritonitis the 99% confidence intervals overlapped the null.

For coeliac disease, we found evidence of stronger associations with moderate eczema but not with severe eczema, be it in comorbidity-adjusted (mild 1.31 [1.25-1.37]; mod. 1.55 [1.47-1.63]; sev. 1.42 [1.07-1.90]) or additionally hospital-admission-adjusted results (mild 1.17 [1.11-1.23]; mod. 1.36 [1.29-1.44]; sev. 1.01 [0.74-1.38]). We found evidence of a dose-response relationship with eczema severity for gastritis and duodenitis (additionally hospital-admission-adjusted aHR mild 1.07 [1.05-1.08]; mod. 1.11 [1.09-1.13]; sev. 1.39

[1.29-1.49]) and diverticular disease, but not for irritable bowel syndrome, pancreatitis, and appendicitis.

#### Mental health disorders and substance use

Eczema was associated with **anxiety** (aHR 1.17 [1.16-1.17]; RD 1.88) and **depression** (aHR 1.17 [1.16-1.17]; RD 1.96) with rate differences on par with skin infections and larger than those from any other category other than atopic and allergic conditions. Eczema was also associated, however with a much lower rate difference, with **alcohol abuse** (aHR 1.13 [1.10-1.15]; RD 0.13). Eczema was also associated to a lesser extent with **cigarette smoking** (aHR 1.11 [1.11-1.12]; RD 3.66), with a large rate difference.

Effect estimates were not considerably changed when using the any-age, 40+ or more severe cohorts instead of the 18+ cohort for any of the outcomes in this category. However, using the <18 cohort led to attenuated HRs for depression and alcohol abuse (aHR 1.00 [0.92-1.08]), but an increased HR for cigarette smoking (aHR 1.20 [1.19-1.22]). HRs were attenuated when excluding non-consulters, especially for cigarette smoking (aHR 1.03 [1.02-1.04]).

While we found evidence for a dose-response relationship with eczema severity for depression (additionally hospital-admission-adjusted aHR mild 1.08 [1.07-1.09]; mod. 1.12 [1.11-1.13]; sev. 1.25 [1.19-1.31]), we did not find this for anxiety (mild 1.11 [1.11-1.12]; mod. 1.13 [1.12-1.14]; sev. 1.04 [0.99-1.09]), alcohol abuse or cigarette smoking.

#### Cardiovascular diseases

Eczema was associated with **thromboembolic diseases** (aHR 1.25 [1.23-1.27]; RD 0.51), and to a lesser extent with **peripheral artery disease** (aHR 1.18 [1.16-1.21]; RD 0.21), **heart failure** (aHR 1.16 [1.15-1.18]; RD 0.52), **coronary artery disease** (aHR 1.15 [1.14-1.16]; RD 1.07), **hypertension** (aHR 1.11 [1.10-1.12]; RD 1.40), **myocardial infarction** (aHR 1.09 [1.07-1.11]; RD 0.15) and **stroke** (aHR 1.09 [1.07-1.10]; RD 0.27).

Using the other cohorts instead of the 18+ cohort did not change effect estimates considerably, except an attenuated HR in the <18 cohort for thromboembolic diseases (aHR 1.08 [1.01-1.16]). For all outcomes in this category HRs were attenuated in analyses excluding non-consulters; while evidence of association remained relatively strong for thromboembolic diseases (aHR 1.18 [1.15-1.20]), HRs were close to the null for coronary artery disease (aHR 1.04 [1.02-1.05]), hypertension, myocardial infarction, and stroke.

For all outcomes in this category there was evidence of a dose-response relationship with eczema severity; the largest HR for severe eczema being for thromboembolic diseases (additionally hospital-admission-adjusted aHR mild 1.04 [1.01-1.07]; mod. 1.17 [1.15-1.19]; sev. 1.67 [1.53-1.83]) and the smallest for coronary artery disease (mild 1.07 [1.06-1.09]; mod. 1.08 [1.06-1.09]; sev. 1.14 [1.07-1.21]).

#### Metabolic diseases

Eczema was associated with **obesity** (aHR 1.22 [1.21-1.23]; RD 0.77), and to a lesser extent with **dyslipidaemia** (aHR 1.13 [1.12-1.14]; RD 0.50), **diabetes mellitus** (aHR 1.13 [1.12-1.14]; RD 0.45) and **metabolic syndrome** (aHR 1.25 [1.10-1.42]; RD 0.01).

Using the other cohorts instead of the any-age cohorts caused little change in effect estimates, except for a HR attenuated to the null for diabetes in the <18 cohort (1.03 [0.98-1.08]). HRs were attenuated after excluding non-consulters, and for metabolic syndrome and dyslipidaemia were at, or close to, the null.

We found some evidence of a dose-response relationship with eczema severity for diabetes (additionally hospital-admission-adjusted aHR mild 1.03 [1.01-1.05]; mod. 1.11 [1.09-1.12]; sev. 1.18 [1.11-1.27]), but not for the other outcomes in this category.

#### Neurological diseases

Eczema was associated with **peripheral neuropathies** (aHR 1.21 [1.20-1.22]; RD 2.13) with a considerable rate difference similar to that of allergic rhinitis. Eczema was also associated to **migraine** (aHR 1.18 [1.17-1.19]; RD 0.66), and to a lesser extent to **epilepsy** (aHR 1.15 [1.12-1.18]; RD 0.09) and **multiple sclerosis** (aHR 1.11 [1.03-1.18]; RD 0.01). Eczema was not, or only very weakly, associated with **Alzheimer's dementia** (aHR 1.04 [1.02-1.06]; RD 0.07), **vascular dementia** (aHR 1.07 [1.04-1.10]; RD 0.07) and **Parkinson's disease** (aHR 1.02 [0.98-1.05]; RD 0.01).

Using the other cohorts caused little change in effect estimates, except attenuations when using the <18 cohorts for peripheral neuropathies (aHR 1.08 [1.05-1.11]) and epilepsy (aHR 1.04 [1.01-1.08]). Excluding non-consulters attenuated HRs for all outcomes, including to the null for multiple sclerosis (0.99 [0.90-1.10]).

We found some evidence for a dose-response relationship with eczema severity for peripheral neuropathies (additionally hospital-admission-adjusted aHR mild 1.12 [1.11-1.14]; mod. 1.17 [1.16-1.18]; sev. 1.20 [1.14-1.27]) but not for the other outcomes in this category.

#### ADHD and autism

Eczema was weakly associated with **ADHD** (aHR 1.08 [1.06-1.11]; RD 0.06) and **autism** (aHR 1.15 [1.13-1.17]; RD 0.15).

While using any of the other cohorts instead of the any-age cohort for ADHD caused little change in the effect estimates and widened confidence intervals to include the null, for autism, using the 40+ cohort instead of the any-age cohort considerably increased the effect estimate (aHR 1.59 [1.45-1.76]).

Effect estimates were similar for mild, moderate and severe eczema, with wide CIs for severe eczema.

#### Bone health

Eczema was associated with **osteoporosis** (aHR 1.18 [1.16-1.20]; RD 0.53), and to a lesser extent (in order of decreasing aHR) with **spine fracture** (aHR 1.17 [1.14-1.20]; RD 0.13), **pelvis fracture** (aHR 1.11 [1.07-1.15]; RD 0.05), **hip fracture** (aHR 1.11 [1.09-1.13]; RD 0.14), and **wrist fracture** (aHR 1.07 [1.05-1.08]; RD 0.17).

Using the other cohorts, instead of the 18+ cohort caused little change in effect estimates, with wide CIs in the <18 cohort. Excluding non-consulters somewhat attenuated HRs (e.g., for osteoporosis aHR 1.12 [1.10-1.14]).

We found relatively large HRs for severe eczema for osteoporosis (additionally hospital-admission-adjusted aHR mild 1.05 [1.03-1.07]; mod. 1.07 [1.05-1.09]; sev. 2.70 [2.52-2.90]) and all fractures, except for wrist fracture (mild 1.01 [0.99-1.03] ; mod. 1.03 [1.01-1.05]; sev. 1.08 [0.98-1.20]).

#### Cancer

Eczema was not, or only weakly, associated with solid organ cancers including **lung cancer** (aHR 1.05 [1.02-1.08]; RD 0.04), **breast cancer** (aHR 1.03 [1.01-1.05]; RD 0.04), **prostate cancer** (aHR 1.01 [0.99-1.03]; RD 0.02), **pancreatic cancer** (aHR 1.05 [1.00-1.11]; RD 0.01), **central nervous system cancers** (aHR 1.05 [1.01-1.10]; RD 0.01), and **melanoma** (aHR 1.08 [1.05-1.11]; RD 0.03). Eczema was associated with **myeloma** (aHR 1.10 [1.03-1.18]; RD 0.01), and **non-melanoma skin cancer** (aHR 1.13 [1.11-1.14]; RD 0.25), non-melanoma skin cancer having the largest rate difference of any cancer, however still lower than many other outcomes. Eczema was associated with **non-Hodgkin's lymphoma** (aHR 1.26 [1.21-1.32]; RD 0.05) and strongly associated with **Hodgkin lymphoma** (aHR 1.85 [1.66-2.06]; RD 0.02), however with very small rate differences for both outcomes.

Using the other cohorts caused little change in effect estimates. Excluding non-consulters attenuated effect estimates; CIs for central nervous system cancers, myeloma and melanoma now crossed the null, while evidence for an association with lymphomas and nonmelanoma skin cancer remained.

Evidence for a dose-response relationship with eczema severity was found for non-Hodgkin lymphoma and nonmelanoma skin cancer. For Hodgkin lymphoma we found increasing HRs, but wide CIs for severe eczema (additionally hospital-admission-adjusted aHR mild 1.13 [0.95-1.35] ; mod. 1.58 [1.37-1.82]; sev. 2.02 [1.03-3.98]).

Supplementary Table 1: Eczema compared to no eczema

| Outcome                    | Main cohort | events    | person-years | Crude Rate (per 1,000 person-years) |           | Crude Rate difference | Estimated Rate difference <sup>2</sup> | Hazard ratio (99% confidence interval) <sup>1</sup> |                      |                   |
|----------------------------|-------------|-----------|--------------|-------------------------------------|-----------|-----------------------|----------------------------------------|-----------------------------------------------------|----------------------|-------------------|
|                            |             |           |              | exposed                             | unexposed |                       |                                        | minimally-adjusted                                  | comorbidity-adjusted | drug-adjusted     |
| <b>Atopic and allergic</b> |             |           |              |                                     |           |                       |                                        |                                                     |                      |                   |
| Food allergy               | any age     | 94,867    | 129,677,918  | 2.0                                 | 0.4       | 1.53                  | 1.48                                   | 4.37 [4.29-4.45]*                                   | 4.03 [3.95-4.11]*    | 4.01 [3.93-4.09]* |
| Allergic Conjunctivitis    | any age     | 154,539   | 128,319,292  | 2.2                                 | 1.0       | 1.22                  | 1.10                                   | 2.21 [2.18-2.25]*                                   | 2.01 [1.98-2.04]*    | 2.00 [1.97-2.03]* |
| Allergic Rhinitis          | any age     | 699,425   | 109,630,416  | 11.1                                | 5.2       | 5.93                  | 5.32                                   | 2.09 [2.07-2.10]*                                   | 1.92 [1.90-1.93]*    | 1.90 [1.89-1.92]* |
| Asthma                     | any age     | 699,010   | 99,106,832   | 11.5                                | 5.9       | 5.57                  | 5.35                                   | 1.97 [1.95-1.98]*                                   | 1.87 [1.86-1.89]*    | 1.83 [1.82-1.85]* |
| Eosinophilic Oesophagitis  | any age     | 2,208     | 132,363,302  | 0.0                                 | 0.0       | 0.01                  | 0.01                                   | 1.96 [1.72-2.23]*                                   | 1.64 [1.42-1.90]*    | 1.62 [1.40-1.88]* |
| <b>Cancer</b>              |             |           |              |                                     |           |                       |                                        |                                                     |                      |                   |
| Hodgkin lymphoma           | any age     | 3,522     | 132,300,421  | 0.0                                 | 0.0       | 0.02                  | 0.02                                   | 1.88 [1.69-2.08]*                                   | 1.85 [1.66-2.06]*    | 1.84 [1.65-2.05]* |
| Non-Hodgkin lymphoma       | any age     | 25,915    | 132,075,634  | 0.2                                 | 0.2       | 0.03                  | 0.05                                   | 1.30 [1.25-1.36]*                                   | 1.26 [1.21-1.32]*    | 1.26 [1.21-1.31]* |
| Nonmelanoma skin cancer    | any age     | 267,492   | 128,656,533  | 2.2                                 | 2.0       | 0.16                  | 0.25                                   | 1.17 [1.16-1.19]*                                   | 1.13 [1.11-1.14]*    | 1.13 [1.11-1.14]* |
| Myeloma                    | any age     | 10,458    | 132,301,340  | 0.1                                 | 0.1       | 0.00                  | 0.01                                   | 1.13 [1.06-1.21]*                                   | 1.10 [1.03-1.18]*    | 1.10 [1.02-1.18]* |
| Melanoma                   | any age     | 55,580    | 131,347,273  | 0.4                                 | 0.4       | 0.00                  | 0.03                                   | 1.11 [1.08-1.14]*                                   | 1.08 [1.05-1.11]*    | 1.08 [1.05-1.12]* |
| CNS cancers                | any age     | 27,380    | 132,126,472  | 0.2                                 | 0.2       | 0.00                  | 0.01                                   | 1.10 [1.06-1.15]*                                   | 1.05 [1.01-1.10]     | 1.05 [1.01-1.10]  |
| Pancreatic cancer          | 18+         | 16,298    | 92,340,078   | 0.2                                 | 0.2       | 0.02                  | 0.01                                   | 1.09 [1.03-1.15]*                                   | 1.05 [1.00-1.11]     | 1.05 [0.99-1.11]  |
| Lung cancer                | 18+         | 73,294    | 92,155,590   | 0.9                                 | 0.8       | 0.09                  | 0.04                                   | 1.13 [1.10-1.15]*                                   | 1.05 [1.02-1.08]*    | 1.05 [1.02-1.08]* |
| Breast cancer              | 18+         | 103,962   | 90,553,313   | 1.2                                 | 1.1       | 0.07                  | 0.04                                   | 1.04 [1.02-1.06]*                                   | 1.03 [1.01-1.05]*    | 1.03 [1.01-1.06]* |
| Prostate cancer            | 40+         | 101,527   | 58,336,375   | 1.8                                 | 1.7       | 0.12                  | 0.02                                   | 1.03 [1.01-1.05]*                                   | 1.01 [0.99-1.03]     | 1.01 [0.99-1.03]  |
| <b>Skin infection</b>      |             |           |              |                                     |           |                       |                                        |                                                     |                      |                   |
| Molluscum contagiosum      | any age     | 306,757   | 126,603,018  | 4.1                                 | 2.0       | 2.13                  | 1.85                                   | 1.84 [1.82-1.86]*                                   | 1.81 [1.79-1.83]*    | 1.81 [1.79-1.83]* |
| Dermatophyte infection     | any age     | 774,374   | 112,045,992  | 10.0                                | 6.1       | 3.88                  | 3.75                                   | 1.67 [1.66-1.69]*                                   | 1.60 [1.59-1.61]*    | 1.60 [1.58-1.61]* |
| Herpes simplex             | any age     | 240,103   | 126,651,269  | 2.8                                 | 1.7       | 1.09                  | 0.94                                   | 1.66 [1.64-1.68]*                                   | 1.51 [1.49-1.53]*    | 1.51 [1.49-1.53]* |
| Impetigo                   | any age     | 513,128   | 118,822,044  | 6.3                                 | 3.8       | 2.45                  | 2.08                                   | 1.55 [1.54-1.56]*                                   | 1.49 [1.48-1.51]*    | 1.49 [1.48-1.50]* |
| Cutaneous warts            | any age     | 1,102,269 | 109,295,803  | 13.2                                | 9.3       | 3.85                  | 3.04                                   | 1.35 [1.35-1.36]*                                   | 1.30 [1.29-1.31]*    | 1.30 [1.29-1.31]* |
| <b>Immune mediated</b>     |             |           |              |                                     |           |                       |                                        |                                                     |                      |                   |
| Alopecia Areata            | any age     | 34,376    | 131,681,350  | 0.4                                 | 0.2       | 0.20                  | 0.18                                   | 1.87 [1.81-1.93]*                                   | 1.77 [1.71-1.83]*    | 1.76 [1.70-1.82]* |
| Urticaria                  | any age     | 414,078   | 122,363,873  | 5.1                                 | 3.0       | 2.10                  | 1.87                                   | 1.68 [1.67-1.70]*                                   | 1.58 [1.57-1.60]*    | 1.58 [1.56-1.59]* |
| COPD                       | 40+         | 269,930   | 54,706,063   | 6.5                                 | 4.6       | 1.94                  | 1.15                                   | 1.41 [1.40-1.43]*                                   | 1.22 [1.20-1.23]*    | 1.18 [1.17-1.20]* |
| <b>Digestive system</b>    |             |           |              |                                     |           |                       |                                        |                                                     |                      |                   |

| Outcome                      | Main cohort | events  | person-years | Crude Rate (per 1,000 person-years) |           | Crude Rate difference | Estimated Rate difference <sup>2</sup> | Hazard ratio (99% confidence interval) <sup>1</sup> |                      |                   |
|------------------------------|-------------|---------|--------------|-------------------------------------|-----------|-----------------------|----------------------------------------|-----------------------------------------------------|----------------------|-------------------|
|                              |             |         |              | exposed                             | unexposed |                       |                                        | minimally-adjusted                                  | comorbidity-adjusted | drug-adjusted     |
| Crohn's disease              | any age     | 20,230  | 131,801,877  | 0.2                                 | 0.1       | 0.10                  | 0.09                                   | 1.75 [1.68-1.83]*                                   | 1.62 [1.54-1.69]*    | 1.59 [1.51-1.66]* |
| Coeliac disease              | any age     | 31,782  | 131,778,936  | 0.3                                 | 0.2       | 0.11                  | 0.10                                   | 1.52 [1.46-1.57]*                                   | 1.42 [1.37-1.47]*    | 1.42 [1.36-1.47]* |
| Ulcerative colitis           | any age     | 27,027  | 131,570,373  | 0.3                                 | 0.2       | 0.08                  | 0.08                                   | 1.49 [1.43-1.55]*                                   | 1.40 [1.34-1.46]*    | 1.37 [1.31-1.43]* |
| Irritable bowel syndrome     | any age     | 272,010 | 123,906,183  | 2.8                                 | 2.0       | 0.82                  | 0.67                                   | 1.47 [1.45-1.48]*                                   | 1.31 [1.29-1.32]*    | 1.31 [1.29-1.32]* |
| Oesophagitis                 | any age     | 248,927 | 125,676,829  | 2.4                                 | 1.9       | 0.52                  | 0.48                                   | 1.40 [1.38-1.41]*                                   | 1.25 [1.23-1.27]*    | 1.24 [1.23-1.26]* |
| Gastro oesophageal reflux    | any age     | 539,815 | 120,056,979  | 5.5                                 | 4.2       | 1.31                  | 1.10                                   | 1.39 [1.38-1.40]*                                   | 1.25 [1.24-1.26]*    | 1.24 [1.23-1.25]* |
| Gastritis and duodenitis     | any age     | 356,381 | 126,112,608  | 3.4                                 | 2.7       | 0.75                  | 0.60                                   | 1.35 [1.33-1.36]*                                   | 1.21 [1.20-1.23]*    | 1.21 [1.19-1.22]* |
| Diverticular disease         | 18+         | 314,741 | 87,721,438   | 4.4                                 | 3.4       | 1.02                  | 0.64                                   | 1.29 [1.28-1.31]*                                   | 1.17 [1.15-1.18]*    | 1.16 [1.15-1.18]* |
| Barrett's oesophagus         | 18+         | 42,753  | 91,753,003   | 0.6                                 | 0.4       | 0.11                  | 0.08                                   | 1.27 [1.23-1.31]*                                   | 1.16 [1.12-1.20]*    | 1.16 [1.12-1.20]* |
| Peptic ulcer disease         | any age     | 71,432  | 130,748,986  | 0.6                                 | 0.5       | 0.07                  | 0.08                                   | 1.25 [1.22-1.28]*                                   | 1.16 [1.13-1.19]*    | 1.15 [1.12-1.18]* |
| Abdominal hernia             | any age     | 291,201 | 125,008,052  | 2.6                                 | 2.3       | 0.29                  | 0.30                                   | 1.20 [1.19-1.22]*                                   | 1.13 [1.12-1.15]*    | 1.13 [1.11-1.14]* |
| Pancreatitis                 | any age     | 37,452  | 131,799,502  | 0.3                                 | 0.3       | 0.04                  | 0.03                                   | 1.23 [1.18-1.27]*                                   | 1.11 [1.07-1.15]*    | 1.10 [1.06-1.14]* |
| Appendicitis                 | any age     | 109,685 | 129,865,984  | 1.0                                 | 0.8       | 0.14                  | 0.06                                   | 1.14 [1.11-1.16]*                                   | 1.07 [1.05-1.09]*    | 1.07 [1.05-1.09]* |
| Peritonitis                  | any age     | 13,032  | 132,170,298  | 0.1                                 | 0.1       | 0.01                  | 0.01                                   | 1.15 [1.09-1.22]*                                   | 1.07 [1.00-1.13]     | 1.06 [1.00-1.13]  |
| <b>Liver</b>                 |             |         |              |                                     |           |                       |                                        |                                                     |                      |                   |
| Autoimmune liver disease     | any age     | 6,352   | 132,269,823  | 0.1                                 | 0.0       | 0.02                  | 0.01                                   | 1.44 [1.33-1.56]*                                   | 1.32 [1.21-1.43]*    | 1.31 [1.20-1.42]* |
| Fibrosis/sclerosis/cirrhosis | 18+         | 29,160  | 92,025,270   | 0.4                                 | 0.3       | 0.13                  | 0.09                                   | 1.43 [1.38-1.49]*                                   | 1.26 [1.21-1.32]*    | 1.26 [1.20-1.31]* |
| Fatty liver                  | any age     | 148,815 | 131,108,036  | 1.4                                 | 1.1       | 0.36                  | 0.28                                   | 1.43 [1.41-1.46]*                                   | 1.24 [1.22-1.26]*    | 1.24 [1.21-1.26]* |
| Oesophageal varices          | 18+         | 8,813   | 92,294,383   | 0.1                                 | 0.1       | 0.04                  | 0.02                                   | 1.43 [1.33-1.53]*                                   | 1.19 [1.10-1.30]*    | 1.19 [1.09-1.29]* |
| Cholecystitis                | any age     | 66,438  | 131,413,446  | 0.6                                 | 0.5       | 0.06                  | 0.05                                   | 1.22 [1.19-1.25]*                                   | 1.10 [1.07-1.14]*    | 1.10 [1.07-1.13]* |
| <b>Cardiovascular</b>        |             |         |              |                                     |           |                       |                                        |                                                     |                      |                   |
| Thromboembolic diseases      | 18+         | 177,337 | 89,591,235   | 2.5                                 | 1.9       | 0.66                  | 0.51                                   | 1.35 [1.33-1.37]*                                   | 1.25 [1.23-1.27]*    | 1.24 [1.22-1.26]* |
| Peripheral artery disease    | 18+         | 103,675 | 90,508,776   | 1.4                                 | 1.1       | 0.31                  | 0.21                                   | 1.29 [1.26-1.32]*                                   | 1.18 [1.16-1.21]*    | 1.18 [1.15-1.20]* |
| Heart failure                | 18+         | 270,404 | 89,987,240   | 3.7                                 | 2.8       | 0.85                  | 0.52                                   | 1.27 [1.25-1.28]*                                   | 1.16 [1.15-1.18]*    | 1.15 [1.14-1.17]* |
| Coronary artery disease      | 18+         | 540,912 | 77,641,301   | 8.3                                 | 6.7       | 1.61                  | 1.07                                   | 1.24 [1.23-1.25]*                                   | 1.15 [1.14-1.16]*    | 1.15 [1.13-1.16]* |
| Hypertension                 | 18+         | 775,356 | 67,565,647   | 14.0                                | 10.9      | 3.16                  | 1.40                                   | 1.17 [1.16-1.17]*                                   | 1.11 [1.10-1.12]*    | 1.11 [1.10-1.12]* |
| Stroke                       | 18+         | 261,037 | 89,936,081   | 3.4                                 | 2.8       | 0.56                  | 0.27                                   | 1.18 [1.16-1.19]*                                   | 1.09 [1.07-1.10]*    | 1.09 [1.07-1.10]* |
| Myocardial infarction        | 18+         | 151,717 | 89,598,403   | 1.9                                 | 1.6       | 0.29                  | 0.15                                   | 1.17 [1.15-1.19]*                                   | 1.09 [1.07-1.11]*    | 1.08 [1.06-1.10]* |
| <b>Metabolic</b>             |             |         |              |                                     |           |                       |                                        |                                                     |                      |                   |
| Metabolic syndrome           | any age     | 3,040   | 132,305,044  | 0.0                                 | 0.0       | 0.01                  | 0.01                                   | 1.45 [1.29-1.63]*                                   | 1.25 [1.10-1.42]*    | 1.25 [1.10-1.42]* |



| Outcome                                | Main cohort | events    | person-years | Crude Rate (per 1,000 person-years) |           | Crude Rate difference | Estimated Rate difference <sup>2</sup> | Hazard ratio (99% confidence interval) <sup>1</sup> |                      |                   |
|----------------------------------------|-------------|-----------|--------------|-------------------------------------|-----------|-----------------------|----------------------------------------|-----------------------------------------------------|----------------------|-------------------|
|                                        |             |           |              | exposed                             | unexposed |                       |                                        | minimally-adjusted                                  | comorbidity-adjusted | drug-adjusted     |
| Obesity                                | any age     | 441,442   | 122,842,347  | 4.3                                 | 3.4       | 0.88                  | 0.77                                   | 1.35 [1.33-1.36]*                                   | 1.22 [1.21-1.23]*    | 1.21 [1.20-1.22]* |
| Dyslipidaemia                          | any age     | 472,695   | 120,777,185  | 4.4                                 | 3.8       | 0.55                  | 0.50                                   | 1.22 [1.20-1.23]*                                   | 1.13 [1.12-1.14]*    | 1.13 [1.12-1.14]* |
| Diabetes mellitus                      | any age     | 424,701   | 122,434,156  | 3.9                                 | 3.4       | 0.56                  | 0.45                                   | 1.23 [1.22-1.24]*                                   | 1.13 [1.12-1.14]*    | 1.12 [1.11-1.13]* |
| <b>Neurological</b>                    |             |           |              |                                     |           |                       |                                        |                                                     |                      |                   |
| Peripheral neuropathies                | 18+         | 735,314   | 75,941,901   | 12.3                                | 9.1       | 3.20                  | 2.13                                   | 1.33 [1.32-1.34]*                                   | 1.21 [1.20-1.22]*    | 1.20 [1.19-1.21]* |
| Migraine                               | any age     | 433,361   | 122,281,709  | 4.4                                 | 3.3       | 1.03                  | 0.66                                   | 1.28 [1.27-1.30]*                                   | 1.18 [1.17-1.19]*    | 1.17 [1.16-1.19]* |
| Epilepsy                               | any age     | 79,458    | 129,897,303  | 0.7                                 | 0.6       | 0.12                  | 0.09                                   | 1.22 [1.19-1.24]*                                   | 1.15 [1.12-1.18]*    | 1.15 [1.12-1.18]* |
| Multiple sclerosis                     | 18+         | 10,608    | 91,991,931   | 0.1                                 | 0.1       | 0.02                  | 0.01                                   | 1.16 [1.08-1.23]*                                   | 1.11 [1.03-1.18]*    | 1.09 [1.02-1.17]  |
| Vascular dementia                      | 40+         | 57,217    | 59,173,934   | 1.1                                 | 0.9       | 0.18                  | 0.07                                   | 1.13 [1.10-1.16]*                                   | 1.07 [1.04-1.10]*    | 1.07 [1.04-1.10]* |
| Alzheimer's dementia                   | 40+         | 101,271   | 58,896,196   | 1.9                                 | 1.7       | 0.24                  | 0.07                                   | 1.06 [1.04-1.09]*                                   | 1.04 [1.02-1.06]*    | 1.04 [1.02-1.07]* |
| Parkinson's disease                    | 40+         | 40,973    | 59,007,426   | 0.7                                 | 0.7       | 0.06                  | 0.01                                   | 1.05 [1.02-1.09]*                                   | 1.02 [0.98-1.05]     | 1.02 [0.98-1.06]  |
| <b>Bone health</b>                     |             |           |              |                                     |           |                       |                                        |                                                     |                      |                   |
| Osteoporosis                           | 18+         | 249,956   | 88,699,650   | 3.5                                 | 2.7       | 0.79                  | 0.53                                   | 1.26 [1.24-1.27]*                                   | 1.18 [1.16-1.20]*    | 1.17 [1.16-1.19]* |
| Spine fracture                         | 18+         | 67,844    | 91,764,889   | 0.9                                 | 0.7       | 0.21                  | 0.13                                   | 1.28 [1.24-1.31]*                                   | 1.17 [1.14-1.20]*    | 1.16 [1.13-1.20]* |
| Pelvis fracture                        | 18+         | 39,320    | 91,998,149   | 0.5                                 | 0.4       | 0.08                  | 0.05                                   | 1.18 [1.14-1.22]*                                   | 1.11 [1.07-1.15]*    | 1.10 [1.06-1.15]* |
| Hip fracture                           | 18+         | 114,345   | 91,558,912   | 1.4                                 | 1.2       | 0.22                  | 0.14                                   | 1.14 [1.12-1.16]*                                   | 1.11 [1.09-1.13]*    | 1.11 [1.08-1.13]* |
| Wrist fracture                         | 18+         | 209,406   | 86,928,363   | 2.7                                 | 2.3       | 0.35                  | 0.17                                   | 1.14 [1.12-1.16]*                                   | 1.07 [1.05-1.08]*    | 1.06 [1.05-1.08]* |
| <b>Mental health and substance use</b> |             |           |              |                                     |           |                       |                                        |                                                     |                      |                   |
| Depression                             | any age     | 1,173,853 | 101,880,802  | 13.7                                | 10.9      | 2.77                  | 1.96                                   | 1.27 [1.26-1.28]*                                   | 1.17 [1.16-1.17]*    | 1.16 [1.15-1.17]* |
| Anxiety                                | any age     | 1,192,074 | 110,373,722  | 13.2                                | 10.2      | 2.97                  | 1.88                                   | 1.28 [1.27-1.29]*                                   | 1.17 [1.16-1.17]*    | 1.16 [1.16-1.17]* |
| Alcohol abuse                          | 18+         | 85,997    | 90,151,061   | 1.1                                 | 0.9       | 0.24                  | 0.13                                   | 1.27 [1.24-1.30]*                                   | 1.13 [1.10-1.15]*    | 1.12 [1.10-1.15]* |
| Cigarette smoking                      | 18+         | 1,152,377 | 36,461,715   | 35.9                                | 30.4      | 5.51                  | 3.66                                   | 1.21 [1.20-1.21]*                                   | 1.11 [1.11-1.12]*    | 1.11 [1.10-1.12]* |
| <b>ADHD and autism</b>                 |             |           |              |                                     |           |                       |                                        |                                                     |                      |                   |
| Autism                                 | any age     | 117,398   | 131,252,965  | 1.2                                 | 0.8       | 0.36                  | 0.15                                   | 1.20 [1.17-1.22]*                                   | 1.15 [1.13-1.17]*    | 1.15 [1.13-1.17]* |
| ADHD                                   | any age     | 82,899    | 131,446,061  | 0.8                                 | 0.6       | 0.23                  | 0.06                                   | 1.17 [1.14-1.20]*                                   | 1.08 [1.06-1.11]*    | 1.08 [1.05-1.10]* |

<sup>1</sup> Hazard ratios (99% confidence intervals) estimated from Cox models comparing people with eczema to those without eczema. \* indicates that the result is significant under Bonferroni-correction.

<sup>2</sup> Rate difference calculated using the estimated rate in the unexposed (rate in the exposed \* (1/hazard ratio))

Supplementary Table 2: Eczema compared to no eczema in cohort excluding non-consulters

| Outcome                    | Main cohort | events  | person-years | Crude Rate (per 1,000 person-years) |           | Crude Rate difference | Estimated Rate difference <sup>2</sup> | Hazard ratio (99% confidence interval) <sup>1</sup> |                      |
|----------------------------|-------------|---------|--------------|-------------------------------------|-----------|-----------------------|----------------------------------------|-----------------------------------------------------|----------------------|
|                            |             |         |              | exposed                             | unexposed |                       |                                        | minimally-adjusted                                  | comorbidity-adjusted |
| <b>Atopic and allergic</b> |             |         |              |                                     |           |                       |                                        |                                                     |                      |
| Food allergy               | any age     | 31,379  | 39,420,872   | 1.7                                 | 0.4       | 1.25                  | 1.18                                   | 3.51 [3.39-3.63]*                                   | 3.29 [3.17-3.41]*    |
| Allergic Conjunctivitis    | any age     | 51,670  | 38,742,604   | 2.1                                 | 1.0       | 1.09                  | 0.97                                   | 2.00 [1.94-2.05]*                                   | 1.84 [1.79-1.89]*    |
| Allergic Rhinitis          | any age     | 206,460 | 32,340,252   | 9.6                                 | 5.1       | 4.50                  | 3.69                                   | 1.75 [1.73-1.78]*                                   | 1.63 [1.60-1.65]*    |
| Asthma                     | any age     | 205,112 | 28,641,937   | 10.0                                | 6.0       | 3.99                  | 3.61                                   | 1.63 [1.61-1.65]*                                   | 1.57 [1.55-1.59]*    |
| Eosinophilic Oesophagitis  | any age     | 745     | 40,235,828   | 0.0                                 | 0.0       | 0.01                  | 0.01                                   | 1.61 [1.29-2.01]*                                   | 1.38 [1.06-1.79]     |
| <b>Skin infection</b>      |             |         |              |                                     |           |                       |                                        |                                                     |                      |
| Molluscum contagiosum      | any age     | 49,080  | 39,356,781   | 2.0                                 | 0.9       | 1.09                  | 0.83                                   | 1.70 [1.66-1.75]*                                   | 1.69 [1.64-1.74]*    |
| Dermatophyte infection     | any age     | 277,126 | 32,615,442   | 11.2                                | 7.4       | 3.73                  | 3.65                                   | 1.53 [1.51-1.55]*                                   | 1.49 [1.47-1.50]*    |
| Impetigo                   | any age     | 107,149 | 37,280,992   | 4.0                                 | 2.4       | 1.62                  | 1.21                                   | 1.48 [1.45-1.51]*                                   | 1.43 [1.40-1.46]*    |
| Herpes simplex             | any age     | 87,128  | 38,033,887   | 3.0                                 | 2.0       | 0.99                  | 0.78                                   | 1.45 [1.42-1.48]*                                   | 1.35 [1.32-1.38]*    |
| Cutaneous warts            | any age     | 295,940 | 32,720,185   | 10.7                                | 8.4       | 2.28                  | 1.77                                   | 1.23 [1.22-1.25]*                                   | 1.20 [1.19-1.21]*    |
| <b>Cancer</b>              |             |         |              |                                     |           |                       |                                        |                                                     |                      |
| Hodgkin lymphoma           | any age     | 1,422   | 40,209,682   | 0.0                                 | 0.0       | 0.02                  | 0.02                                   | 1.62 [1.39-1.90]*                                   | 1.66 [1.40-1.97]*    |
| Non-Hodgkin lymphoma       | any age     | 14,270  | 40,078,540   | 0.4                                 | 0.4       | 0.00                  | 0.05                                   | 1.19 [1.13-1.25]*                                   | 1.17 [1.11-1.23]*    |
| Nonmelanoma skin cancer    | any age     | 153,228 | 37,993,558   | 3.8                                 | 4.1       | -0.31                 | 0.31                                   | 1.12 [1.10-1.13]*                                   | 1.09 [1.07-1.11]*    |
| Myeloma                    | any age     | 6,139   | 40,196,423   | 0.1                                 | 0.2       | -0.02                 | 0.01                                   | 1.07 [0.98-1.16]                                    | 1.06 [0.97-1.15]     |
| Lung cancer                | 18+         | 43,575  | 36,006,463   | 1.1                                 | 1.2       | -0.11                 | 0.05                                   | 1.09 [1.05-1.12]*                                   | 1.05 [1.01-1.09]*    |
| CNS cancers                | any age     | 14,158  | 40,117,177   | 0.3                                 | 0.4       | -0.04                 | 0.01                                   | 1.04 [0.99-1.10]                                    | 1.03 [0.97-1.08]     |
| Melanoma                   | any age     | 29,584  | 39,682,351   | 0.7                                 | 0.8       | -0.09                 | 0.01                                   | 1.04 [1.00-1.08]                                    | 1.02 [0.98-1.06]     |
| Pancreatic cancer          | 18+         | 9,718   | 36,118,069   | 0.2                                 | 0.3       | -0.03                 | 0.00                                   | 1.02 [0.95-1.09]                                    | 1.01 [0.95-1.09]     |
| Breast cancer              | 18+         | 54,455  | 35,154,316   | 1.5                                 | 1.6       | -0.10                 | 0.01                                   | 1.01 [0.98-1.04]                                    | 1.01 [0.98-1.03]     |
| Prostate cancer            | 40+         | 55,875  | 25,598,065   | 2.1                                 | 2.2       | -0.14                 | -0.04                                  | 0.99 [0.96-1.02]                                    | 0.98 [0.95-1.01]     |
| <b>Immune mediated</b>     |             |         |              |                                     |           |                       |                                        |                                                     |                      |
| Alopecia Areata            | any age     | 10,168  | 40,007,493   | 0.4                                 | 0.2       | 0.18                  | 0.14                                   | 1.67 [1.57-1.77]*                                   | 1.60 [1.51-1.70]*    |
| Urticaria                  | any age     | 133,971 | 36,753,066   | 5.1                                 | 3.1       | 2.09                  | 1.88                                   | 1.66 [1.63-1.68]*                                   | 1.58 [1.55-1.60]*    |
| COPD                       | 40+         | 150,633 | 23,312,919   | 7.4                                 | 6.1       | 1.27                  | 1.06                                   | 1.28 [1.26-1.30]*                                   | 1.17 [1.15-1.19]*    |

| Outcome                      | Main cohort | events  | person-years | Crude Rate (per 1,000 person-years) |           | Crude Rate difference | Estimated Rate difference <sup>2</sup> | Hazard ratio (99% confidence interval) <sup>1</sup> |                      |
|------------------------------|-------------|---------|--------------|-------------------------------------|-----------|-----------------------|----------------------------------------|-----------------------------------------------------|----------------------|
|                              |             |         |              | exposed                             | unexposed |                       |                                        | minimally-adjusted                                  | comorbidity-adjusted |
| <b>Digestive system</b>      |             |         |              |                                     |           |                       |                                        |                                                     |                      |
| Crohn's disease              | any age     | 7,942   | 39,988,139   | 0.3                                 | 0.2       | 0.08                  | 0.07                                   | 1.44 [1.35-1.54]*                                   | 1.38 [1.28-1.48]*    |
| Coeliac disease              | any age     | 12,159  | 39,974,187   | 0.4                                 | 0.3       | 0.10                  | 0.09                                   | 1.38 [1.31-1.46]*                                   | 1.33 [1.25-1.40]*    |
| Ulcerative colitis           | any age     | 11,130  | 39,868,425   | 0.3                                 | 0.3       | 0.08                  | 0.08                                   | 1.38 [1.30-1.46]*                                   | 1.33 [1.25-1.41]*    |
| Irritable bowel syndrome     | any age     | 111,225 | 36,180,739   | 3.7                                 | 2.8       | 0.83                  | 0.55                                   | 1.28 [1.26-1.30]*                                   | 1.18 [1.15-1.20]*    |
| Gastro oesophageal reflux    | any age     | 250,909 | 34,609,586   | 8.1                                 | 6.9       | 1.22                  | 1.03                                   | 1.23 [1.22-1.25]*                                   | 1.15 [1.13-1.16]*    |
| Oesophagitis                 | any age     | 123,741 | 36,806,213   | 3.6                                 | 3.2       | 0.39                  | 0.43                                   | 1.22 [1.20-1.24]*                                   | 1.13 [1.11-1.16]*    |
| Gastritis and duodenitis     | any age     | 170,219 | 37,157,455   | 5.0                                 | 4.4       | 0.53                  | 0.54                                   | 1.20 [1.18-1.22]*                                   | 1.12 [1.10-1.14]*    |
| Peptic ulcer disease         | any age     | 39,595  | 39,327,184   | 1.0                                 | 1.0       | -0.01                 | 0.10                                   | 1.15 [1.11-1.19]*                                   | 1.11 [1.07-1.14]*    |
| Diverticular disease         | 18+         | 182,307 | 33,204,593   | 5.7                                 | 5.4       | 0.29                  | 0.52                                   | 1.17 [1.15-1.19]*                                   | 1.10 [1.08-1.12]*    |
| Barrett's oesophagus         | 18+         | 23,979  | 35,770,599   | 0.7                                 | 0.7       | 0.02                  | 0.06                                   | 1.15 [1.10-1.19]*                                   | 1.09 [1.05-1.14]*    |
| Abdominal hernia             | any age     | 129,486 | 37,173,490   | 3.6                                 | 3.4       | 0.14                  | 0.24                                   | 1.12 [1.10-1.14]*                                   | 1.07 [1.05-1.09]*    |
| Pancreatitis                 | any age     | 19,679  | 39,927,481   | 0.5                                 | 0.5       | -0.01                 | 0.02                                   | 1.11 [1.06-1.16]*                                   | 1.05 [1.00-1.10]     |
| Peritonitis                  | any age     | 6,200   | 40,139,173   | 0.2                                 | 0.2       | 0.00                  | 0.00                                   | 1.07 [0.99-1.16]                                    | 1.02 [0.93-1.11]     |
| Appendicitis                 | any age     | 30,646  | 39,312,823   | 0.9                                 | 0.8       | 0.10                  | 0.01                                   | 1.06 [1.02-1.10]*                                   | 1.01 [0.97-1.05]     |
| <b>Liver</b>                 |             |         |              |                                     |           |                       |                                        |                                                     |                      |
| Fibrosis/sclerosis/cirrhosis | 18+         | 15,460  | 35,951,051   | 0.5                                 | 0.4       | 0.11                  | 0.10                                   | 1.30 [1.24-1.37]*                                   | 1.23 [1.16-1.31]*    |
| Autoimmune liver disease     | any age     | 3,262   | 40,181,687   | 0.1                                 | 0.1       | 0.01                  | 0.01                                   | 1.26 [1.13-1.40]*                                   | 1.20 [1.07-1.34]*    |
| Fatty liver                  | any age     | 77,435  | 39,534,128   | 2.2                                 | 1.8       | 0.40                  | 0.27                                   | 1.23 [1.20-1.25]*                                   | 1.14 [1.11-1.16]*    |
| Oesophageal varices          | 18+         | 4,805   | 36,093,029   | 0.2                                 | 0.1       | 0.02                  | 0.02                                   | 1.22 [1.11-1.33]*                                   | 1.12 [1.00-1.25]     |
| Cholecystitis                | any age     | 36,888  | 39,695,778   | 0.9                                 | 0.9       | -0.02                 | 0.04                                   | 1.11 [1.07-1.15]*                                   | 1.05 [1.01-1.08]*    |
| <b>Metabolic</b>             |             |         |              |                                     |           |                       |                                        |                                                     |                      |
| Metabolic syndrome           | any age     | 1,592   | 40,196,325   | 0.0                                 | 0.0       | 0.01                  | 0.01                                   | 1.27 [1.09-1.48]*                                   | 1.18 [1.00-1.40]     |
| Obesity                      | any age     | 202,440 | 35,116,121   | 6.3                                 | 5.5       | 0.77                  | 0.65                                   | 1.17 [1.15-1.19]*                                   | 1.12 [1.10-1.13]*    |
| Diabetes mellitus            | any age     | 211,379 | 33,877,918   | 6.4                                 | 6.2       | 0.24                  | 0.40                                   | 1.10 [1.09-1.12]*                                   | 1.07 [1.05-1.08]*    |
| Dyslipidaemia                | any age     | 233,796 | 33,126,227   | 7.1                                 | 7.0       | 0.07                  | 0.23                                   | 1.05 [1.04-1.07]*                                   | 1.03 [1.02-1.05]*    |
| <b>Cardiovascular</b>        |             |         |              |                                     |           |                       |                                        |                                                     |                      |
| Thromboembolic diseases      | 18+         | 99,377  | 34,536,743   | 3.1                                 | 2.8       | 0.35                  | 0.48                                   | 1.23 [1.21-1.26]*                                   | 1.18 [1.15-1.20]*    |
| Peripheral artery disease    | 18+         | 58,139  | 35,009,961   | 1.7                                 | 1.6       | 0.12                  | 0.19                                   | 1.16 [1.13-1.19]*                                   | 1.12 [1.09-1.16]*    |
| Heart failure                | 18+         | 178,114 | 34,500,526   | 5.1                                 | 5.2       | -0.03                 | 0.51                                   | 1.15 [1.13-1.17]*                                   | 1.11 [1.09-1.13]*    |

| Outcome                                | Main cohort | events  | person-years | Crude Rate (per 1,000 person-years) |           | Crude Rate difference | Estimated Rate difference <sup>2</sup> | Hazard ratio (99% confidence interval) <sup>1</sup> |                      |
|----------------------------------------|-------------|---------|--------------|-------------------------------------|-----------|-----------------------|----------------------------------------|-----------------------------------------------------|----------------------|
|                                        |             |         |              | exposed                             | unexposed |                       |                                        | minimally-adjusted                                  | comorbidity-adjusted |
| Myocardial infarction                  | 18+         | 85,523  | 34,323,530   | 2.5                                 | 2.5       | -0.05                 | 0.12                                   | 1.08 [1.06-1.11]*                                   | 1.05 [1.03-1.07]*    |
| Stroke                                 | 18+         | 161,564 | 34,482,030   | 4.5                                 | 4.8       | -0.24                 | 0.19                                   | 1.08 [1.06-1.10]*                                   | 1.04 [1.03-1.06]*    |
| Coronary artery disease                | 18+         | 263,114 | 27,094,936   | 10.0                                | 9.6       | 0.46                  | 0.36                                   | 1.06 [1.04-1.07]*                                   | 1.04 [1.02-1.05]*    |
| Hypertension                           | 18+         | 310,729 | 20,645,566   | 16.3                                | 14.5      | 1.82                  | 0.32                                   | 1.03 [1.02-1.04]*                                   | 1.02 [1.01-1.03]*    |
| <b>ADHD and autism</b>                 |             |         |              |                                     |           |                       |                                        |                                                     |                      |
| Autism                                 | any age     | 20,061  | 40,063,554   | 0.7                                 | 0.4       | 0.26                  | 0.09                                   | 1.19 [1.14-1.24]*                                   | 1.14 [1.09-1.20]*    |
| ADHD                                   | any age     | 13,611  | 40,092,048   | 0.4                                 | 0.3       | 0.14                  | 0.01                                   | 1.11 [1.05-1.17]*                                   | 1.02 [0.97-1.09]     |
| <b>Bone health</b>                     |             |         |              |                                     |           |                       |                                        |                                                     |                      |
| Spine fracture                         | 18+         | 40,626  | 35,805,762   | 1.2                                 | 1.1       | 0.05                  | 0.14                                   | 1.20 [1.16-1.24]*                                   | 1.13 [1.10-1.17]*    |
| Osteoporosis                           | 18+         | 146,892 | 33,853,196   | 4.5                                 | 4.3       | 0.16                  | 0.47                                   | 1.16 [1.15-1.18]*                                   | 1.12 [1.10-1.14]*    |
| Pelvis fracture                        | 18+         | 24,446  | 35,932,429   | 0.7                                 | 0.7       | -0.04                 | 0.05                                   | 1.12 [1.07-1.17]*                                   | 1.08 [1.03-1.13]*    |
| Hip fracture                           | 18+         | 74,166  | 35,626,857   | 1.9                                 | 2.1       | -0.20                 | 0.13                                   | 1.08 [1.05-1.10]*                                   | 1.07 [1.04-1.10]*    |
| Wrist fracture                         | 18+         | 88,266  | 34,176,561   | 2.7                                 | 2.6       | 0.11                  | 0.10                                   | 1.09 [1.07-1.12]*                                   | 1.04 [1.02-1.06]*    |
| <b>Neurological</b>                    |             |         |              |                                     |           |                       |                                        |                                                     |                      |
| Peripheral neuropathies                | 18+         | 362,151 | 27,666,633   | 14.5                                | 12.5      | 1.96                  | 1.50                                   | 1.18 [1.17-1.19]*                                   | 1.12 [1.10-1.13]*    |
| Epilepsy                               | any age     | 28,065  | 39,240,731   | 0.8                                 | 0.7       | 0.08                  | 0.07                                   | 1.13 [1.09-1.18]*                                   | 1.10 [1.06-1.15]*    |
| Migraine                               | any age     | 155,745 | 35,787,986   | 4.9                                 | 4.1       | 0.83                  | 0.28                                   | 1.13 [1.11-1.15]*                                   | 1.06 [1.04-1.08]*    |
| Vascular dementia                      | 40+         | 41,612  | 26,075,152   | 1.5                                 | 1.6       | -0.18                 | 0.04                                   | 1.05 [1.02-1.09]*                                   | 1.03 [0.99-1.07]     |
| Alzheimer's dementia                   | 40+         | 68,619  | 25,894,807   | 2.4                                 | 2.7       | -0.31                 | 0.01                                   | 1.02 [0.99-1.05]                                    | 1.00 [0.98-1.03]     |
| Multiple sclerosis                     | 18+         | 4,581   | 35,967,823   | 0.1                                 | 0.1       | 0.01                  | 0.00                                   | 1.03 [0.94-1.13]                                    | 0.99 [0.90-1.10]     |
| Parkinson's disease                    | 40+         | 25,377  | 26,007,909   | 0.9                                 | 1.0       | -0.11                 | -0.03                                  | 0.99 [0.95-1.03]                                    | 0.97 [0.93-1.02]     |
| <b>Mental health and substance use</b> |             |         |              |                                     |           |                       |                                        |                                                     |                      |
| Alcohol abuse                          | 18+         | 32,986  | 35,210,385   | 1.1                                 | 0.9       | 0.21                  | 0.10                                   | 1.16 [1.13-1.20]*                                   | 1.10 [1.06-1.15]*    |
| Depression                             | any age     | 423,775 | 26,381,735   | 17.5                                | 15.4      | 2.15                  | 1.52                                   | 1.15 [1.14-1.16]*                                   | 1.09 [1.08-1.11]*    |
| Anxiety                                | any age     | 436,589 | 30,278,081   | 16.1                                | 13.7      | 2.39                  | 1.30                                   | 1.16 [1.15-1.17]*                                   | 1.09 [1.08-1.10]*    |
| Cigarette smoking                      | 18+         | 389,069 | 11,869,938   | 34.7                                | 31.8      | 2.87                  | 0.89                                   | 1.06 [1.05-1.08]*                                   | 1.03 [1.02-1.04]*    |

<sup>1</sup> Hazard ratios (99% confidence intervals) estimated from Cox models comparing people with eczema to those without eczema. \* indicates that the result is significant under Bonferroni-correction.

<sup>2</sup> Rate difference calculated using the estimated rate in the unexposed (rate in the exposed \* (1/hazard ratio))

Supplementary Table 3: Eczema compared to no eczema (different cohorts)

| Outcome                    | any age   |              |                   | 18+     |              |                   | 40+     |              |                   | <18     |              |                   | more severe eczema |              |                   |
|----------------------------|-----------|--------------|-------------------|---------|--------------|-------------------|---------|--------------|-------------------|---------|--------------|-------------------|--------------------|--------------|-------------------|
|                            | events    | person-years | HR (99% CI)       | events  | person-years | HR (99% CI)       | events  | person-years | HR (99% CI)       | events  | person-years | HR (99% CI)       | events             | person-years | HR (99% CI)       |
| <b>Atopic and allergic</b> |           |              |                   |         |              |                   |         |              |                   |         |              |                   |                    |              |                   |
| Food allergy               | 94,867    | 129,677,918  | 4.03 [3.95-4.11]* | 36,346  | 90,758,416   | 2.00 [1.94-2.07]* | 19,014  | 58,847,144   | 1.64 [1.56-1.72]* | 67,435  | 52,722,951   | 5.30 [5.18-5.43]* | 48,020             | 69,810,727   | 4.09 [3.99-4.21]* |
| Allergic Conjunctivitis    | 154,539   | 128,319,292  | 2.01 [1.98-2.04]* | 83,746  | 88,908,159   | 2.05 [2.00-2.09]* | 54,873  | 57,328,621   | 1.94 [1.89-1.99]* | 79,747  | 52,924,451   | 1.95 [1.91-1.99]* | 80,154             | 68,834,678   | 2.06 [2.01-2.10]* |
| Allergic Rhinitis          | 699,425   | 109,630,416  | 1.92 [1.90-1.93]* | 346,822 | 72,658,422   | 1.64 [1.63-1.66]* | 194,734 | 49,076,389   | 1.57 [1.55-1.59]* | 401,482 | 46,324,198   | 2.11 [2.09-2.13]* | 344,294            | 57,091,888   | 1.85 [1.83-1.87]* |
| Asthma                     | 699,010   | 99,106,832   | 1.87 [1.86-1.89]* | 342,326 | 65,228,770   | 1.56 [1.54-1.58]* | 229,656 | 43,928,284   | 1.44 [1.42-1.46]* | 391,020 | 42,163,744   | 2.11 [2.09-2.13]* | 328,142            | 50,945,959   | 1.84 [1.82-1.86]* |
| Eosinophilic Oesophagitis  | 2,208     | 132,363,302  | 1.64 [1.42-1.90]* | 1,830   | 92,362,564   | 1.39 [1.18-1.63]* | 1,026   | 59,455,212   | 1.45 [1.18-1.79]* | 850     | 54,412,995   | 1.73 [1.36-2.20]* | 1,389              | 71,581,409   | 1.61 [1.33-1.93]* |
| <b>Cancer</b>              |           |              |                   |         |              |                   |         |              |                   |         |              |                   |                    |              |                   |
| Hodgkin lymphoma           | 3,522     | 132,300,421  | 1.85 [1.66-2.06]* | 3,279   | 92,298,081   | 1.82 [1.63-2.04]* | 2,123   | 59,406,647   | 1.83 [1.59-2.11]* | 843     | 54,409,314   | 1.32 [1.04-1.69]  | 2,355              | 71,538,280   | 2.07 [1.81-2.35]* |
| Non-Hodgkin lymphoma       | 25,915    | 132,075,634  | 1.26 [1.21-1.32]* | 25,409  | 92,075,310   | 1.25 [1.20-1.31]* | 24,153  | 59,176,710   | 1.21 [1.16-1.27]* | 958     | 54,407,241   | 1.44 [1.15-1.79]* | 18,378             | 71,370,652   | 1.25 [1.19-1.32]* |
| Nonmelanoma skin cancer    | 267,492   | 128,656,533  | 1.13 [1.11-1.14]* | 267,284 | 88,656,272   | 1.13 [1.12-1.15]* | 263,245 | 55,764,474   | 1.13 [1.11-1.14]* | 954     | 54,410,574   | 1.23 [0.97-1.57]  | 188,427            | 68,834,084   | 1.13 [1.11-1.15]* |
| Myeloma                    | 10,458    | 132,301,340  | 1.10 [1.03-1.18]* | 10,481  | 92,299,141   | 1.09 [1.02-1.17]  | 10,424  | 59,387,643   | 1.09 [1.01-1.16]  | 19      | 54,416,946   | 3.21 [0.30-34.91] | 7,493              | 71,536,540   | 1.09 [1.00-1.18]  |
| Melanoma                   | 55,580    | 131,347,273  | 1.08 [1.05-1.11]* | 54,902  | 91,358,254   | 1.06 [1.03-1.09]* | 51,124  | 58,500,027   | 1.06 [1.03-1.09]* | 1,717   | 54,383,646   | 1.36 [1.16-1.61]* | 37,978             | 70,863,352   | 1.04 [1.00-1.08]  |
| Pancreatic cancer          | 16,253    | 132,341,977  | 1.08 [1.02-1.14]  | 16,298  | 92,340,078   | 1.05 [1.00-1.11]  | 16,139  | 59,428,684   | 1.06 [1.00-1.12]  | 34      | 54,417,096   | 0.75 [0.16-3.61]  | 11,634             | 71,567,021   | 1.07 [1.00-1.14]  |
| CNS cancers                | 27,380    | 132,126,472  | 1.05 [1.01-1.10]  | 26,029  | 92,134,082   | 1.04 [0.99-1.08]  | 23,961  | 59,252,865   | 1.04 [0.99-1.09]  | 2,149   | 54,393,808   | 1.07 [0.92-1.25]  | 18,383             | 71,426,502   | 1.01 [0.96-1.07]  |
| Lung cancer                | 73,148    | 132,156,528  | 1.05 [1.02-1.08]* | 73,294  | 92,155,590   | 1.05 [1.02-1.08]* | 73,050  | 59,245,622   | 1.04 [1.01-1.07]* | 133     | 54,415,892   | 0.81 [0.39-1.68]  | 51,939             | 71,441,203   | 1.04 [1.01-1.08]  |
| Breast cancer              | 104,091   | 130,554,198  | 1.03 [1.01-1.06]* | 103,962 | 90,553,313   | 1.03 [1.01-1.05]* | 99,754  | 57,661,140   | 1.03 [1.00-1.05]  | 822     | 54,410,096   | 1.28 [0.99-1.65]  | 69,173             | 70,329,303   | 1.02 [0.99-1.04]  |
| Prostate cancer            | 106,207   | 131,231,073  | 1.01 [0.99-1.03]  | 106,056 | 91,228,456   | 1.01 [0.99-1.03]  | 101,527 | 58,336,375   | 1.01 [0.99-1.03]  | 1,460   | 54,410,617   | 0.92 [0.74-1.14]  | 76,197             | 70,731,756   | 0.99 [0.96-1.01]  |
| <b>Skin infection</b>      |           |              |                   |         |              |                   |         |              |                   |         |              |                   |                    |              |                   |
| Molluscum contagiosum      | 306,757   | 126,603,018  | 1.81 [1.79-1.83]* | 12,208  | 89,759,059   | 1.58 [1.49-1.67]* | 4,075   | 59,258,225   | 1.65 [1.50-1.82]* | 297,997 | 49,124,962   | 1.82 [1.80-1.84]* | 89,964             | 68,613,841   | 1.70 [1.67-1.74]* |
| Dermatophyte infection     | 774,374   | 112,045,992  | 1.60 [1.59-1.61]* | 539,905 | 74,498,937   | 1.64 [1.63-1.66]* | 368,210 | 46,928,806   | 1.65 [1.63-1.67]* | 293,769 | 49,082,666   | 1.45 [1.43-1.46]* | 422,121            | 58,121,050   | 1.58 [1.56-1.59]* |
| Herpes simplex             | 240,103   | 126,651,269  | 1.51 [1.49-1.53]* | 170,625 | 87,318,770   | 1.49 [1.47-1.52]* | 84,767  | 56,444,990   | 1.49 [1.46-1.52]* | 103,444 | 52,701,653   | 1.48 [1.46-1.51]* | 128,100            | 67,863,553   | 1.57 [1.54-1.60]* |
| Impetigo                   | 513,128   | 118,822,044  | 1.49 [1.48-1.51]* | 119,047 | 84,238,356   | 1.67 [1.64-1.70]* | 59,605  | 56,884,350   | 1.70 [1.66-1.75]* | 416,143 | 44,929,007   | 1.44 [1.43-1.45]* | 173,066            | 64,011,567   | 1.64 [1.62-1.67]* |
| Cutaneous warts            | 1,102,269 | 109,295,803  | 1.30 [1.29-1.31]* | 492,556 | 73,810,304   | 1.30 [1.29-1.32]* | 356,688 | 49,250,317   | 1.27 [1.26-1.29]* | 652,761 | 44,211,946   | 1.29 [1.28-1.30]* | 509,152            | 57,467,979   | 1.24 [1.22-1.25]* |
| <b>Immune mediated</b>     |           |              |                   |         |              |                   |         |              |                   |         |              |                   |                    |              |                   |
| Alopecia Areata            | 34,376    | 131,681,350  | 1.77 [1.71-1.83]* | 24,631  | 91,729,784   | 1.76 [1.69-1.83]* | 10,296  | 59,101,543   | 1.87 [1.76-1.99]* | 16,151  | 54,222,224   | 1.61 [1.53-1.69]* | 19,376             | 71,069,501   | 2.12 [2.03-2.22]* |
| Urticaria                  | 414,078   | 122,363,873  | 1.58 [1.57-1.60]* | 219,498 | 84,661,641   | 1.77 [1.75-1.80]* | 134,643 | 54,694,880   | 1.85 [1.82-1.88]* | 226,520 | 50,282,124   | 1.38 [1.36-1.40]* | 194,711            | 65,283,293   | 1.71 [1.69-1.74]* |
| COPD                       | 283,421   | 127,542,421  | 1.22 [1.21-1.24]* | 278,628 | 87,554,259   | 1.22 [1.21-1.24]* | 269,930 | 54,706,063   | 1.22 [1.20-1.23]* | 7,511   | 54,362,064   | 1.41 [1.30-1.52]* | 192,615            | 68,086,813   | 1.23 [1.21-1.25]* |
| <b>Digestive system</b>    |           |              |                   |         |              |                   |         |              |                   |         |              |                   |                    |              |                   |
| Crohn's disease            | 20,230    | 131,801,877  | 1.62 [1.54-1.69]* | 17,599  | 91,798,601   | 1.54 [1.46-1.61]* | 10,036  | 59,063,492   | 1.41 [1.32-1.50]* | 6,288   | 54,351,647   | 1.82 [1.67-1.97]* | 12,678             | 71,135,928   | 1.64 [1.55-1.74]* |
| Coeliac disease            | 31,782    | 131,778,936  | 1.42 [1.37-1.47]* | 22,873  | 91,838,275   | 1.49 [1.42-1.55]* | 14,899  | 59,062,544   | 1.45 [1.38-1.53]* | 12,507  | 54,283,960   | 1.34 [1.26-1.42]* | 17,831             | 71,194,946   | 1.47 [1.40-1.55]* |
| Ulcerative colitis         | 27,027    | 131,570,373  | 1.40 [1.34-1.46]* | 25,384  | 91,569,305   | 1.40 [1.35-1.46]* | 16,743  | 58,799,312   | 1.37 [1.31-1.45]* | 5,286   | 54,370,374   | 1.35 [1.23-1.49]* | 17,388             | 70,989,662   | 1.41 [1.34-1.48]* |
| Irritable bowel syndrome   | 272,010   | 123,906,183  | 1.31 [1.29-1.32]* | 251,882 | 83,877,969   | 1.30 [1.29-1.32]* | 120,392 | 53,305,886   | 1.30 [1.27-1.32]* | 76,481  | 53,686,842   | 1.22 [1.19-1.25]* | 163,263            | 65,919,762   | 1.26 [1.24-1.28]* |
| Oesophagitis               | 248,927   | 125,676,829  | 1.25 [1.23-1.27]* | 242,728 | 86,032,951   | 1.25 [1.23-1.26]* | 205,543 | 53,626,422   | 1.23 [1.21-1.25]* | 17,909  | 53,873,477   | 1.22 [1.16-1.28]* | 164,123            | 66,957,966   | 1.24 [1.22-1.26]* |
| Gastro oesophageal reflux  | 539,815   | 120,056,979  | 1.25 [1.24-1.26]* | 509,256 | 82,456,955   | 1.24 [1.23-1.26]* | 374,993 | 50,974,376   | 1.24 [1.22-1.25]* | 82,268  | 51,419,346   | 1.16 [1.13-1.19]* | 343,899            | 63,928,212   | 1.23 [1.21-1.24]* |
| Gastritis and duodenitis   | 356,381   | 126,112,608  | 1.21 [1.20-1.23]* | 324,992 | 86,343,605   | 1.21 [1.19-1.22]* | 247,899 | 54,578,712   | 1.21 [1.19-1.23]* | 62,694  | 53,672,691   | 1.16 [1.13-1.19]* | 226,456            | 67,279,508   | 1.21 [1.19-1.22]* |
| Barrett's oesophagus       | 42,774    | 131,755,330  | 1.17 [1.13-1.21]* | 42,753  | 91,753,003   | 1.16 [1.12-1.20]* | 41,353  | 58,848,546   | 1.16 [1.12-1.20]* | 457     | 54,414,691   | 1.35 [0.95-1.92]  | 30,211             | 71,129,424   | 1.18 [1.13-1.22]* |

| Outcome                      | any age |              |                   | 18+     |              |                   | 40+     |              |                   | <18     |              |                   | more severe eczema |              |                   |
|------------------------------|---------|--------------|-------------------|---------|--------------|-------------------|---------|--------------|-------------------|---------|--------------|-------------------|--------------------|--------------|-------------------|
|                              | events  | person-years | HR (99% CI)       | events  | person-years | HR (99% CI)       | events  | person-years | HR (99% CI)       | events  | person-years | HR (99% CI)       | events             | person-years | HR (99% CI)       |
| Diverticular disease         | 314,315 | 127,736,124  | 1.17 [1.16-1.18]* | 314,741 | 87,721,438   | 1.17 [1.15-1.18]* | 310,590 | 54,835,505   | 1.17 [1.15-1.18]* | 1,035   | 54,411,740   | 0.94 [0.73-1.21]  | 218,309            | 68,165,812   | 1.17 [1.15-1.18]* |
| Peptic ulcer disease         | 71,432  | 130,748,986  | 1.16 [1.13-1.19]* | 70,949  | 90,751,917   | 1.15 [1.12-1.18]* | 65,423  | 57,920,062   | 1.15 [1.12-1.18]* | 2,186   | 54,395,190   | 1.09 [0.93-1.28]  | 48,774             | 70,429,325   | 1.16 [1.13-1.20]* |
| Abdominal hernia             | 291,201 | 125,008,052  | 1.13 [1.12-1.15]* | 264,596 | 86,491,371   | 1.14 [1.13-1.16]* | 231,055 | 54,288,859   | 1.13 [1.11-1.15]* | 35,858  | 52,524,243   | 1.05 [1.01-1.09]* | 186,986            | 66,947,242   | 1.13 [1.11-1.15]* |
| Pancreatitis                 | 37,452  | 131,799,502  | 1.11 [1.07-1.15]* | 36,836  | 91,796,093   | 1.11 [1.07-1.15]* | 30,683  | 58,949,815   | 1.11 [1.06-1.15]* | 2,838   | 54,396,908   | 1.05 [0.91-1.20]  | 25,305             | 71,181,445   | 1.13 [1.08-1.18]* |
| Appendicitis                 | 109,685 | 129,865,984  | 1.07 [1.05-1.09]* | 71,290  | 89,995,036   | 1.06 [1.03-1.09]* | 31,752  | 58,320,822   | 1.06 [1.02-1.10]* | 59,026  | 53,680,531   | 1.07 [1.04-1.10]* | 58,000             | 70,025,325   | 1.04 [1.01-1.07]* |
| Peritonitis                  | 13,032  | 132,170,298  | 1.07 [1.00-1.13]  | 11,937  | 92,175,888   | 1.09 [1.02-1.17]* | 10,552  | 59,293,913   | 1.07 [1.00-1.15]  | 1,572   | 54,396,733   | 0.92 [0.77-1.10]  | 8,610              | 71,446,300   | 1.12 [1.04-1.21]* |
| <b>Liver</b>                 |         |              |                   |         |              |                   |         |              |                   |         |              |                   |                    |              |                   |
| Autoimmune liver disease     | 6,352   | 132,269,823  | 1.32 [1.21-1.43]* | 6,113   | 92,269,013   | 1.33 [1.22-1.45]* | 5,445   | 59,366,418   | 1.28 [1.17-1.41]* | 536     | 54,412,135   | 1.35 [0.99-1.84]  | 4,332              | 71,506,370   | 1.40 [1.27-1.56]* |
| Fibrosis/sclerosis/cirrhosis | 29,310  | 132,025,070  | 1.27 [1.22-1.33]* | 29,160  | 92,025,270   | 1.26 [1.21-1.32]* | 27,441  | 59,122,489   | 1.26 [1.20-1.32]* | 459     | 54,413,748   | 1.07 [0.73-1.57]  | 20,401             | 71,339,042   | 1.33 [1.27-1.40]* |
| Oesophageal varices          | 8,969   | 132,294,769  | 1.25 [1.15-1.36]* | 8,813   | 92,294,383   | 1.19 [1.10-1.30]* | 8,337   | 59,385,120   | 1.20 [1.10-1.30]* | 222     | 54,415,204   | 0.68 [0.37-1.26]  | 6,264              | 71,530,708   | 1.31 [1.19-1.44]* |
| Fatty liver                  | 148,815 | 131,108,036  | 1.24 [1.22-1.26]* | 147,992 | 91,104,366   | 1.24 [1.22-1.26]* | 125,327 | 58,292,663   | 1.22 [1.20-1.24]* | 9,174   | 54,378,761   | 1.12 [1.04-1.21]* | 100,970            | 70,678,948   | 1.27 [1.25-1.30]* |
| Cholecystitis                | 66,438  | 131,413,446  | 1.10 [1.07-1.14]* | 66,188  | 91,410,660   | 1.10 [1.07-1.13]* | 54,914  | 58,589,876   | 1.10 [1.06-1.13]* | 3,750   | 54,393,261   | 1.06 [0.94-1.20]  | 45,105             | 70,908,953   | 1.09 [1.06-1.13]* |
| <b>Cardiovascular</b>        |         |              |                   |         |              |                   |         |              |                   |         |              |                   |                    |              |                   |
| Thromboembolic diseases      | 179,703 | 129,589,832  | 1.25 [1.23-1.27]* | 177,337 | 89,591,235   | 1.25 [1.23-1.27]* | 153,374 | 56,887,914   | 1.26 [1.24-1.28]* | 10,466  | 54,349,762   | 1.08 [1.01-1.16]  | 121,924            | 69,538,408   | 1.29 [1.26-1.31]* |
| Peripheral artery disease    | 109,045 | 130,499,739  | 1.19 [1.17-1.22]* | 103,675 | 90,508,776   | 1.18 [1.16-1.21]* | 90,469  | 57,774,816   | 1.19 [1.16-1.22]* | 11,096  | 54,318,982   | 1.25 [1.17-1.33]* | 72,271             | 70,250,314   | 1.19 [1.16-1.22]* |
| Heart failure                | 271,334 | 129,977,066  | 1.16 [1.15-1.18]* | 270,404 | 89,987,240   | 1.16 [1.15-1.18]* | 267,064 | 57,096,857   | 1.16 [1.15-1.18]* | 1,874   | 54,393,484   | 1.22 [1.03-1.43]  | 195,647            | 69,812,797   | 1.19 [1.17-1.21]* |
| Coronary artery disease      | 542,526 | 117,637,329  | 1.15 [1.14-1.16]* | 540,912 | 77,641,301   | 1.15 [1.14-1.16]* | 521,594 | 44,792,835   | 1.14 [1.13-1.15]* | 2,550   | 54,392,243   | 1.16 [1.01-1.33]  | 355,004            | 61,020,143   | 1.14 [1.12-1.15]* |
| Hypertension                 | 778,252 | 107,536,239  | 1.11 [1.10-1.12]* | 775,356 | 67,565,647   | 1.11 [1.10-1.12]* | 726,959 | 34,956,886   | 1.10 [1.09-1.10]* | 12,608  | 54,314,974   | 1.15 [1.08-1.23]* | 512,582            | 54,045,752   | 1.12 [1.11-1.13]* |
| Stroke                       | 262,348 | 129,923,172  | 1.09 [1.08-1.11]* | 261,037 | 89,936,081   | 1.09 [1.07-1.10]* | 253,317 | 57,072,340   | 1.09 [1.07-1.10]* | 4,262   | 54,383,050   | 1.09 [0.97-1.22]  | 185,120            | 69,782,157   | 1.10 [1.08-1.12]* |
| Myocardial infarction        | 151,921 | 129,599,396  | 1.09 [1.07-1.11]* | 151,717 | 89,598,403   | 1.09 [1.07-1.11]* | 149,802 | 56,718,012   | 1.08 [1.06-1.10]* | 529     | 54,407,411   | 1.21 [0.87-1.67]  | 106,145            | 69,576,394   | 1.08 [1.06-1.11]* |
| <b>Metabolic</b>             |         |              |                   |         |              |                   |         |              |                   |         |              |                   |                    |              |                   |
| Metabolic syndrome           | 3,040   | 132,305,044  | 1.25 [1.10-1.42]* | 2,914   | 92,303,697   | 1.25 [1.09-1.42]* | 2,618   | 59,394,105   | 1.20 [1.05-1.37]* | 225     | 54,415,577   | 1.34 [0.81-2.24]  | 1,978              | 71,540,170   | 1.21 [1.03-1.42]  |
| Obesity                      | 441,442 | 122,842,347  | 1.22 [1.21-1.23]* | 413,075 | 82,975,060   | 1.21 [1.19-1.22]* | 315,700 | 51,643,300   | 1.18 [1.17-1.20]* | 60,129  | 53,677,040   | 1.24 [1.20-1.27]* | 279,052            | 65,021,429   | 1.21 [1.20-1.23]* |
| Dyslipidaemia                | 472,695 | 120,777,185  | 1.13 [1.12-1.14]* | 471,352 | 80,794,082   | 1.13 [1.11-1.14]* | 443,724 | 48,106,476   | 1.11 [1.10-1.13]* | 8,055   | 54,340,806   | 1.15 [1.06-1.25]* | 312,780            | 63,323,703   | 1.12 [1.10-1.13]* |
| Diabetes mellitus            | 424,701 | 122,434,156  | 1.13 [1.12-1.14]* | 412,898 | 82,513,267   | 1.13 [1.12-1.14]* | 382,135 | 50,014,610   | 1.12 [1.11-1.13]* | 21,153  | 54,175,049   | 1.03 [0.98-1.08]  | 284,447            | 64,552,155   | 1.14 [1.12-1.15]* |
| <b>Neurological</b>          |         |              |                   |         |              |                   |         |              |                   |         |              |                   |                    |              |                   |
| Peripheral neuropathies      | 749,054 | 115,839,998  | 1.21 [1.20-1.22]* | 735,314 | 75,941,901   | 1.21 [1.20-1.22]* | 572,444 | 44,549,919   | 1.20 [1.19-1.21]* | 58,571  | 53,882,012   | 1.08 [1.05-1.11]* | 485,557            | 60,000,225   | 1.21 [1.19-1.22]* |
| Migraine                     | 433,361 | 122,281,709  | 1.18 [1.17-1.19]* | 340,641 | 82,416,524   | 1.16 [1.15-1.18]* | 142,854 | 53,446,927   | 1.16 [1.14-1.18]* | 180,757 | 52,498,784   | 1.15 [1.13-1.17]* | 244,301            | 65,057,469   | 1.15 [1.13-1.16]* |
| Epilepsy                     | 79,458  | 129,897,303  | 1.15 [1.12-1.18]* | 54,425  | 90,146,585   | 1.20 [1.16-1.23]* | 36,696  | 57,939,223   | 1.22 [1.18-1.26]* | 33,100  | 53,835,759   | 1.04 [1.01-1.08]  | 42,548             | 70,038,866   | 1.15 [1.11-1.19]* |
| Multiple sclerosis           | 10,738  | 131,992,849  | 1.08 [1.01-1.16]  | 10,608  | 91,991,931   | 1.11 [1.03-1.18]* | 7,058   | 59,118,667   | 1.06 [0.97-1.15]  | 1,119   | 54,410,184   | 1.20 [0.96-1.50]  | 6,794              | 71,338,756   | 1.04 [0.96-1.14]  |
| Vascular dementia            | 57,197  | 132,088,130  | 1.07 [1.04-1.11]* | 57,484  | 92,084,536   | 1.05 [1.02-1.09]* | 57,217  | 59,173,934   | 1.07 [1.04-1.10]* | 2       | 54,417,313   | 45.45 [0.00-Inf]  | 42,203             | 71,382,082   | 1.06 [1.02-1.09]* |
| Alzheimer's dementia         | 101,292 | 131,809,395  | 1.04 [1.01-1.06]* | 101,212 | 91,807,655   | 1.03 [1.01-1.06]* | 101,271 | 58,896,196   | 1.04 [1.02-1.06]* | 7       | 54,417,299   | 0.00 [0.00-Inf]   | 75,030             | 71,183,422   | 1.04 [1.01-1.07]* |
| Parkinson's disease          | 41,294  | 131,920,159  | 1.01 [0.98-1.05]  | 41,246  | 91,918,870   | 1.01 [0.98-1.05]  | 40,973  | 59,007,426   | 1.02 [0.98-1.05]  | 42      | 54,417,083   | 1.68 [0.28-10.02] | 29,252             | 71,271,015   | 1.00 [0.96-1.04]  |
| <b>Bone health</b>           |         |              |                   |         |              |                   |         |              |                   |         |              |                   |                    |              |                   |
| Osteoporosis                 | 250,761 | 128,703,828  | 1.18 [1.17-1.20]* | 249,956 | 88,699,650   | 1.18 [1.16-1.20]* | 239,610 | 55,888,565   | 1.18 [1.16-1.20]* | 6,147   | 54,374,325   | 1.03 [0.94-1.14]  | 171,836            | 68,929,999   | 1.19 [1.17-1.21]* |
| Spine fracture               | 69,735  | 131,767,311  | 1.18 [1.15-1.21]* | 67,844  | 91,764,889   | 1.17 [1.14-1.20]* | 62,684  | 58,938,370   | 1.18 [1.15-1.21]* | 4,456   | 54,380,303   | 1.08 [0.97-1.20]  | 49,456             | 71,150,690   | 1.19 [1.15-1.23]* |
| Pelvis fracture              | 40,804  | 132,000,002  | 1.11 [1.07-1.16]* | 39,320  | 91,998,149   | 1.11 [1.07-1.15]* | 36,635  | 59,146,906   | 1.10 [1.06-1.15]* | 2,892   | 54,389,448   | 1.13 [0.99-1.29]  | 28,790             | 71,326,578   | 1.15 [1.10-1.20]* |
| Hip fracture                 | 115,400 | 131,556,904  | 1.10 [1.08-1.13]* | 114,345 | 91,558,912   | 1.11 [1.09-1.13]* | 112,923 | 58,674,498   | 1.11 [1.09-1.13]* | 1,675   | 54,397,140   | 1.01 [0.85-1.20]  | 82,664             | 70,997,170   | 1.12 [1.09-1.15]* |

| Outcome                                | any age   |              |                   | 18+       |              |                   | 40+     |              |                   | <18     |              |                   | more severe eczema |              |                   |
|----------------------------------------|-----------|--------------|-------------------|-----------|--------------|-------------------|---------|--------------|-------------------|---------|--------------|-------------------|--------------------|--------------|-------------------|
|                                        | events    | person-years | HR (99% CI)       | events    | person-years | HR (99% CI)       | events  | person-years | HR (99% CI)       | events  | person-years | HR (99% CI)       | events             | person-years | HR (99% CI)       |
| Wrist fracture                         | 347,340   | 126,339,972  | 1.07 [1.06-1.08]* | 209,406   | 86,928,363   | 1.07 [1.05-1.08]* | 141,676 | 56,549,751   | 1.08 [1.06-1.10]* | 176,301 | 52,360,923   | 1.05 [1.04-1.07]* | 182,701            | 67,833,624   | 1.06 [1.04-1.08]* |
| <b>Mental health and substance use</b> |           |              |                   |           |              |                   |         |              |                   |         |              |                   |                    |              |                   |
| Depression                             | 1,173,853 | 101,880,802  | 1.17 [1.16-1.17]* | 1,057,782 | 61,734,001   | 1.18 [1.17-1.18]* | 503,245 | 37,862,921   | 1.19 [1.18-1.20]* | 412,429 | 51,317,877   | 1.07 [1.06-1.08]* | 694,183            | 51,515,079   | 1.17 [1.16-1.18]* |
| Anxiety                                | 1,192,074 | 110,373,722  | 1.17 [1.16-1.17]* | 1,036,290 | 70,517,871   | 1.16 [1.15-1.17]* | 500,440 | 44,263,250   | 1.17 [1.16-1.18]* | 442,174 | 51,489,247   | 1.12 [1.11-1.13]* | 703,338            | 57,090,892   | 1.14 [1.14-1.15]* |
| Cigarette smoking                      | 1,503,334 | 75,626,953   | 1.16 [1.15-1.16]* | 1,152,377 | 36,461,715   | 1.11 [1.11-1.12]* | 676,513 | 21,652,862   | 1.11 [1.10-1.12]* | 597,160 | 46,705,054   | 1.20 [1.19-1.22]* | 842,247            | 34,466,678   | 1.16 [1.15-1.17]* |
| Alcohol abuse                          | 86,553    | 130,161,057  | 1.14 [1.11-1.16]* | 85,997    | 90,151,061   | 1.13 [1.10-1.15]* | 59,149  | 57,593,204   | 1.17 [1.14-1.21]* | 9,263   | 54,340,238   | 1.00 [0.92-1.08]  | 56,007             | 70,101,808   | 1.16 [1.13-1.20]* |
| <b>ADHD and autism</b>                 |           |              |                   |           |              |                   |         |              |                   |         |              |                   |                    |              |                   |
| Autism                                 | 117,398   | 131,252,965  | 1.15 [1.13-1.17]* | 20,490    | 91,818,977   | 1.18 [1.12-1.24]* | 5,087   | 59,391,025   | 1.59 [1.45-1.76]* | 108,483 | 53,464,948   | 1.12 [1.10-1.15]* | 43,049             | 71,036,201   | 1.12 [1.09-1.16]* |
| ADHD                                   | 82,899    | 131,446,061  | 1.08 [1.06-1.11]* | 17,820    | 91,837,352   | 1.04 [0.98-1.10]  | 3,667   | 59,423,507   | 1.05 [0.93-1.19]  | 75,154  | 53,631,908   | 1.07 [1.05-1.10]* | 32,206             | 71,140,671   | 1.05 [1.01-1.09]  |

Hazard ratios (99% confidence intervals) estimated from Cox models comparing people with eczema to those without eczema. \* indicates that the result is significant under Bonferroni-correction.

Supplementary Table 4: Mild, moderate, and severe eczema compared to no eczema

| Outcome                                | Event   |         |         |       | Person-years |            |           |         | Rate (per 1,000 person-years) |      |      |      | Hazard ratio (99% confidence interval) <sup>1</sup> |                   |                   |                               |                   |                   |
|----------------------------------------|---------|---------|---------|-------|--------------|------------|-----------|---------|-------------------------------|------|------|------|-----------------------------------------------------|-------------------|-------------------|-------------------------------|-------------------|-------------------|
|                                        | unexp.  | mild    | mod     | sev.  | unexposed    | mild       | moderate  | severe  | unexp.                        | mild | mod. | sev. | comorbidity-adjusted                                |                   |                   | + hospital-admission-adjusted |                   |                   |
|                                        |         |         |         |       |              |            |           |         |                               |      |      |      | mild                                                | moderate          | severe            | mild                          | moderate          | severe            |
| <b>Atopic and allergic</b>             |         |         |         |       |              |            |           |         |                               |      |      |      |                                                     |                   |                   |                               |                   |                   |
| Asthma                                 | 387,024 | 121,967 | 71,947  | 2,087 | 64,159,288   | 9,827,726  | 6,899,893 | 182,998 | 6.0                           | 12.4 | 10.4 | 11.4 | 1.82 [1.81-1.84]*                                   | 1.93 [1.91-1.95]* | 2.27 [2.12-2.42]* | 1.75 [1.74-1.77]*             | 1.84 [1.82-1.86]* | 1.87 [1.75-2.00]* |
| Food allergy                           | 37,366  | 26,076  | 15,433  | 756   | 84,873,276   | 12,122,364 | 9,013,238 | 258,269 | 0.4                           | 2.2  | 1.7  | 2.9  | 3.80 [3.72-3.89]*                                   | 4.41 [4.28-4.55]* | 7.19 [6.03-8.57]* | 3.66 [3.59-3.75]*             | 4.19 [4.06-4.32]* | 5.72 [4.81-6.80]* |
| Allergic Rhinitis                      | 380,456 | 125,412 | 77,327  | 2,049 | 71,568,278   | 10,480,431 | 7,501,680 | 215,419 | 5.3                           | 12.0 | 10.3 | 9.5  | 1.85 [1.84-1.87]*                                   | 1.98 [1.96-2.00]* | 2.10 [1.96-2.24]* | 1.82 [1.80-1.83]*             | 1.94 [1.92-1.96]* | 1.93 [1.80-2.07]* |
| Allergic Conjunctivitis                | 82,808  | 26,404  | 19,795  | 622   | 83,945,264   | 12,073,779 | 8,870,245 | 258,534 | 1.0                           | 2.2  | 2.2  | 2.4  | 1.83 [1.80-1.87]*                                   | 2.22 [2.17-2.26]* | 2.62 [2.30-2.98]* | 1.80 [1.77-1.83]*             | 2.16 [2.12-2.21]* | 2.43 [2.14-2.77]* |
| Eosinophilic Oesophagitis              | 1,202   | 315     | 263     | 18    | 86,543,079   | 12,436,221 | 9,236,836 | 272,835 | 0.0                           | 0.0  | 0.0  | 0.1  | 1.64 [1.37-1.96]*                                   | 1.64 [1.33-2.02]* | 2.94 [1.22-7.07]  | 1.50 [1.23-1.83]*             | 1.27 [1.00-1.61]  | 1.86 [0.77-4.47]  |
| <b>Immune mediated</b>                 |         |         |         |       |              |            |           |         |                               |      |      |      |                                                     |                   |                   |                               |                   |                   |
| Alopecia Areata                        | 19,433  | 4,498   | 4,703   | 146   | 86,089,509   | 12,394,067 | 9,168,935 | 270,395 | 0.2                           | 0.4  | 0.5  | 0.5  | 1.47 [1.41-1.53]*                                   | 2.20 [2.11-2.30]* | 2.31 [1.79-2.99]* | 1.45 [1.38-1.51]*             | 2.16 [2.06-2.26]* | 2.18 [1.69-2.81]* |
| Urticaria                              | 241,612 | 60,901  | 41,024  | 1,062 | 79,965,865   | 11,568,010 | 8,477,508 | 244,685 | 3.0                           | 5.3  | 4.8  | 4.3  | 1.43 [1.41-1.44]*                                   | 1.83 [1.80-1.86]* | 1.76 [1.61-1.93]* | 1.40 [1.38-1.41]*             | 1.78 [1.75-1.80]* | 1.61 [1.47-1.76]* |
| COPD                                   | 169,013 | 20,065  | 32,716  | 1,427 | 36,380,998   | 3,626,581  | 4,582,128 | 158,940 | 4.6                           | 5.5  | 7.1  | 9.0  | 1.16 [1.14-1.18]*                                   | 1.22 [1.20-1.24]* | 1.61 [1.48-1.75]* | 1.11 [1.08-1.13]*             | 1.16 [1.14-1.18]* | 1.45 [1.33-1.58]* |
| <b>Mental health and substance use</b> |         |         |         |       |              |            |           |         |                               |      |      |      |                                                     |                   |                   |                               |                   |                   |
| Anxiety                                | 736,069 | 131,842 | 114,622 | 3,515 | 71,543,556   | 11,113,645 | 7,707,059 | 219,381 | 10.3                          | 11.9 | 14.9 | 16.0 | 1.15 [1.14-1.16]*                                   | 1.17 [1.16-1.18]* | 1.15 [1.09-1.20]* | 1.11 [1.11-1.12]*             | 1.13 [1.12-1.14]* | 1.04 [0.99-1.09]  |
| Depression                             | 724,983 | 124,504 | 118,326 | 3,870 | 65,556,507   | 10,701,833 | 7,110,763 | 189,898 | 11.1                          | 11.6 | 16.6 | 20.4 | 1.13 [1.12-1.14]*                                   | 1.18 [1.17-1.19]* | 1.45 [1.39-1.53]* | 1.08 [1.07-1.09]*             | 1.12 [1.11-1.13]* | 1.25 [1.19-1.31]* |
| Alcohol abuse                          | 55,308  | 6,977   | 8,859   | 242   | 59,686,892   | 6,542,066  | 7,183,824 | 231,181 | 0.9                           | 1.1  | 1.2  | 1.0  | 1.07 [1.04-1.11]*                                   | 1.16 [1.12-1.19]* | 1.02 [0.84-1.23]  | 1.02 [0.98-1.05]              | 1.08 [1.05-1.12]* | 0.88 [0.73-1.07]  |
| Cigarette smoking                      | 711,589 | 120,980 | 121,543 | 3,509 | 22,481,669   | 3,361,470  | 3,345,392 | 96,503  | 31.7                          | 36.0 | 36.3 | 36.4 | 1.07 [1.06-1.08]*                                   | 1.12 [1.11-1.13]* | 1.16 [1.10-1.22]* | 1.06 [1.05-1.07]*             | 1.10 [1.09-1.11]* | 1.11 [1.05-1.16]* |
| <b>ADHD and autism</b>                 |         |         |         |       |              |            |           |         |                               |      |      |      |                                                     |                   |                   |                               |                   |                   |
| ADHD                                   | 49,693  | 13,310  | 3,881   | 93    | 85,934,630   | 12,337,640 | 9,200,286 | 271,914 | 0.6                           | 1.1  | 0.4  | 0.3  | 1.07 [1.04-1.09]*                                   | 1.10 [1.05-1.15]* | 1.15 [0.85-1.57]  | 1.02 [0.99-1.05]              | 1.03 [0.98-1.08]  | 0.92 [0.67-1.24]  |
| Autism                                 | 70,460  | 19,514  | 5,546   | 174   | 85,818,009   | 12,304,269 | 9,186,268 | 271,592 | 0.8                           | 1.6  | 0.6  | 0.6  | 1.14 [1.11-1.16]*                                   | 1.19 [1.15-1.24]* | 1.54 [1.22-1.93]* | 1.09 [1.06-1.11]*             | 1.12 [1.08-1.17]* | 1.19 [0.94-1.49]  |
| <b>Cardiovascular</b>                  |         |         |         |       |              |            |           |         |                               |      |      |      |                                                     |                   |                   |                               |                   |                   |
| Hypertension                           | 485,707 | 58,437  | 91,668  | 3,494 | 43,923,375   | 5,509,536  | 5,337,945 | 158,419 | 11.1                          | 10.6 | 17.2 | 22.1 | 1.06 [1.05-1.07]*                                   | 1.11 [1.10-1.12]* | 1.35 [1.29-1.42]* | 1.04 [1.02-1.05]*             | 1.08 [1.07-1.09]* | 1.27 [1.21-1.34]* |
| Coronary artery disease                | 347,084 | 38,716  | 60,931  | 2,076 | 51,039,193   | 5,962,107  | 6,102,903 | 190,493 | 6.8                           | 6.5  | 10.0 | 10.9 | 1.12 [1.11-1.14]*                                   | 1.13 [1.12-1.14]* | 1.28 [1.20-1.37]* | 1.07 [1.06-1.09]*             | 1.08 [1.06-1.09]* | 1.14 [1.07-1.21]* |
| Peripheral artery disease              | 66,993  | 7,507   | 11,563  | 550   | 59,937,960   | 6,556,443  | 7,183,579 | 228,595 | 1.1                           | 1.1  | 1.6  | 2.4  | 1.12 [1.08-1.15]*                                   | 1.18 [1.15-1.21]* | 1.74 [1.53-1.98]* | 1.06 [1.03-1.10]*             | 1.12 [1.09-1.15]* | 1.54 [1.36-1.75]* |
| Myocardial infarction                  | 99,087  | 9,339   | 16,701  | 726   | 59,315,205   | 6,535,076  | 7,122,584 | 227,836 | 1.7                           | 1.4  | 2.3  | 3.2  | 1.03 [1.00-1.06]                                    | 1.09 [1.07-1.11]* | 1.54 [1.38-1.72]* | 0.93 [0.90-0.96]*             | 0.98 [0.96-1.00]  | 1.27 [1.14-1.41]* |
| Stroke                                 | 170,968 | 16,663  | 28,922  | 1,159 | 59,571,573   | 6,529,608  | 7,118,675 | 227,756 | 2.9                           | 2.6  | 4.1  | 5.1  | 1.05 [1.03-1.07]*                                   | 1.09 [1.07-1.10]* | 1.37 [1.26-1.49]* | 0.97 [0.95-0.99]*             | 1.00 [0.99-1.02]  | 1.18 [1.09-1.29]* |
| Heart failure                          | 174,440 | 17,113  | 32,869  | 1,500 | 59,596,819   | 6,540,107  | 7,125,567 | 226,876 | 2.9                           | 2.6  | 4.6  | 6.6  | 1.08 [1.05-1.10]*                                   | 1.18 [1.16-1.20]* | 1.81 [1.67-1.96]* | 0.96 [0.94-0.98]*             | 1.06 [1.04-1.08]* | 1.48 [1.36-1.60]* |
| Thromboembolic diseases                | 113,962 | 13,113  | 21,175  | 1,113 | 59,328,977   | 6,517,241  | 7,086,174 | 222,921 | 1.9                           | 2.0  | 3.0  | 5.0  | 1.14 [1.12-1.17]*                                   | 1.28 [1.26-1.31]* | 2.05 [1.87-2.24]* | 1.04 [1.01-1.07]*             | 1.17 [1.15-1.19]* | 1.67 [1.53-1.83]* |
| <b>Metabolic</b>                       |         |         |         |       |              |            |           |         |                               |      |      |      |                                                     |                   |                   |                               |                   |                   |
| Obesity                                | 279,334 | 39,284  | 48,973  | 1,562 | 79,960,812   | 11,906,478 | 8,481,447 | 243,648 | 3.5                           | 3.3  | 5.8  | 6.4  | 1.17 [1.16-1.19]*                                   | 1.23 [1.21-1.24]* | 1.28 [1.19-1.37]* | 1.14 [1.13-1.16]*             | 1.19 [1.17-1.20]* | 1.19 [1.10-1.28]* |
| Dyslipidaemia                          | 302,811 | 35,088  | 51,990  | 1,768 | 78,341,658   | 11,899,071 | 8,334,504 | 239,685 | 3.9                           | 2.9  | 6.2  | 7.4  | 1.12 [1.10-1.13]*                                   | 1.11 [1.10-1.13]* | 1.13 [1.06-1.21]* | 1.09 [1.08-1.11]*             | 1.08 [1.07-1.10]* | 1.07 [1.00-1.14]  |
| Diabetes mellitus                      | 271,217 | 30,899  | 48,577  | 1,897 | 79,520,034   | 12,002,507 | 8,509,284 | 243,340 | 3.4                           | 2.6  | 5.7  | 7.8  | 1.07 [1.05-1.08]*                                   | 1.15 [1.14-1.17]* | 1.29 [1.21-1.38]* | 1.03 [1.01-1.05]*             | 1.11 [1.09-1.12]* | 1.18 [1.11-1.27]* |
| Metabolic syndrome                     | 1,938   | 253     | 355     | 17    | 86,499,544   | 12,433,841 | 9,232,435 | 272,667 | 0.0                           | 0.0  | 0.0  | 0.1  | 1.30 [1.08-1.57]*                                   | 1.18 [1.01-1.38]  | 1.61 [0.81-3.19]  | 1.22 [1.01-1.47]              | 1.07 [0.91-1.25]  | 1.41 [0.72-2.79]  |
| <b>Bone health</b>                     |         |         |         |       |              |            |           |         |                               |      |      |      |                                                     |                   |                   |                               |                   |                   |
| Hip fracture                           | 75,355  | 7,124   | 12,525  | 546   | 60,693,513   | 6,603,614  | 7,258,978 | 232,448 | 1.2                           | 1.1  | 1.7  | 2.3  | 1.05 [1.02-1.09]*                                   | 1.10 [1.07-1.13]* | 1.89 [1.66-2.14]* | 0.95 [0.92-0.98]*             | 1.00 [0.97-1.02]  | 1.63 [1.43-1.85]* |
| Pelvis fracture                        | 25,728  | 2,477   | 4,279   | 238   | 60,999,869   | 6,623,580  | 7,293,289 | 233,997 | 0.4                           | 0.4  | 0.6  | 1.0  | 1.04 [0.98-1.10]                                    | 1.10 [1.06-1.15]* | 1.98 [1.62-2.42]* | 0.94 [0.89-1.00]              | 1.01 [0.96-1.05]  | 1.67 [1.36-2.04]* |
| Spine fracture                         | 43,446  | 4,514   | 7,904   | 499   | 60,842,269   | 6,612,301  | 7,272,339 | 232,672 | 0.7                           | 0.7  | 1.1  | 2.1  | 1.10 [1.06-1.15]*                                   | 1.18 [1.14-1.22]* | 2.12 [1.84-2.44]* | 1.00 [0.96-1.04]              | 1.08 [1.05-1.12]* | 1.80 [1.56-2.08]* |



| Outcome                   | Event   |         |        |       | Person-years |            |           |         | Rate (per 1,000 person-years) |      |      |      | Hazard ratio (99% confidence interval) <sup>†</sup> |                   |                   |                               |                   |                   |
|---------------------------|---------|---------|--------|-------|--------------|------------|-----------|---------|-------------------------------|------|------|------|-----------------------------------------------------|-------------------|-------------------|-------------------------------|-------------------|-------------------|
|                           |         |         |        |       |              |            |           |         |                               |      |      |      | comorbidity-adjusted                                |                   |                   | + hospital-admission-adjusted |                   |                   |
|                           | unexp.  | mild    | mod    | sev.  | unexposed    | mild       | moderate  | severe  | unexp.                        | mild | mod. | sev. | mild                                                | moderate          | severe            | mild                          | moderate          | severe            |
| Wrist fracture            | 137,628 | 17,277  | 18,838 | 733   | 57,381,570   | 6,336,699  | 7,038,331 | 224,751 | 2.4                           | 2.7  | 2.7  | 3.3  | 1.04 [1.01-1.06]*                                   | 1.08 [1.05-1.10]* | 1.18 [1.07-1.31]* | 1.01 [0.99-1.03]              | 1.03 [1.01-1.05]* | 1.08 [0.98-1.20]  |
| Osteoporosis              | 159,261 | 17,359  | 27,775 | 2,246 | 58,714,552   | 6,468,489  | 7,032,838 | 211,907 | 2.7                           | 2.7  | 3.9  | 10.6 | 1.13 [1.10-1.15]*                                   | 1.14 [1.13-1.16]* | 3.07 [2.86-3.29]* | 1.05 [1.03-1.07]*             | 1.07 [1.05-1.09]* | 2.70 [2.52-2.90]* |
| <b>Skin infection</b>     |         |         |        |       |              |            |           |         |                               |      |      |      |                                                     |                   |                   |                               |                   |                   |
| Molluscum contagiosum     | 170,337 | 69,859  | 16,131 | 359   | 82,977,380   | 11,573,925 | 8,916,324 | 265,431 | 2.1                           | 6.0  | 1.8  | 1.4  | 1.76 [1.74-1.78]*                                   | 2.01 [1.97-2.06]* | 2.19 [1.86-2.58]* | 1.76 [1.74-1.78]*             | 2.01 [1.96-2.06]* | 2.17 [1.84-2.55]* |
| Impetigo                  | 303,121 | 88,959  | 33,445 | 876   | 77,774,077   | 10,971,946 | 8,389,802 | 248,230 | 3.9                           | 8.1  | 4.0  | 3.5  | 1.39 [1.38-1.41]*                                   | 1.75 [1.72-1.78]* | 2.09 [1.88-2.31]* | 1.38 [1.36-1.39]*             | 1.72 [1.69-1.75]* | 1.92 [1.73-2.13]* |
| Herpes simplex            | 141,257 | 31,698  | 25,822 | 1,176 | 82,752,931   | 11,997,878 | 8,799,724 | 252,449 | 1.7                           | 2.6  | 2.9  | 4.7  | 1.40 [1.38-1.42]*                                   | 1.60 [1.58-1.63]* | 2.74 [2.49-3.02]* | 1.36 [1.34-1.39]*             | 1.55 [1.53-1.58]* | 2.50 [2.27-2.75]* |
| Dermatophyte infection    | 462,027 | 102,824 | 85,289 | 2,170 | 73,015,310   | 10,874,722 | 7,575,301 | 223,471 | 6.3                           | 9.5  | 11.3 | 9.7  | 1.51 [1.50-1.53]*                                   | 1.66 [1.65-1.68]* | 1.51 [1.42-1.60]* | 1.49 [1.47-1.50]*             | 1.62 [1.61-1.64]* | 1.41 [1.33-1.50]* |
| Cutaneous warts           | 675,992 | 155,589 | 84,401 | 2,452 | 71,210,053   | 10,403,586 | 7,700,518 | 223,759 | 9.5                           | 15.0 | 11.0 | 11.0 | 1.29 [1.28-1.30]*                                   | 1.28 [1.27-1.29]* | 1.39 [1.31-1.47]* | 1.27 [1.26-1.28]*             | 1.26 [1.25-1.28]* | 1.33 [1.26-1.41]* |
| <b>Cancer</b>             |         |         |        |       |              |            |           |         |                               |      |      |      |                                                     |                   |                   |                               |                   |                   |
| Lung cancer               | 48,767  | 4,333   | 7,762  | 366   | 61,107,638   | 6,633,029  | 7,304,030 | 234,473 | 0.8                           | 0.7  | 1.1  | 1.6  | 1.05 [1.00-1.09]                                    | 1.03 [1.00-1.07]  | 1.48 [1.26-1.73]* | 0.88 [0.84-0.92]*             | 0.89 [0.86-0.92]* | 1.14 [0.97-1.35]  |
| Breast cancer             | 69,450  | 6,654   | 9,937  | 320   | 59,969,003   | 6,562,898  | 7,196,345 | 231,456 | 1.2                           | 1.0  | 1.4  | 1.4  | 1.03 [1.00-1.06]                                    | 1.02 [0.99-1.05]  | 0.85 [0.74-0.99]  | 1.00 [0.96-1.03]              | 0.99 [0.96-1.01]  | 0.79 [0.69-0.92]* |
| Prostate cancer           | 67,668  | 5,723   | 10,249 | 288   | 38,876,209   | 3,800,308  | 4,880,263 | 173,530 | 1.7                           | 1.5  | 2.1  | 1.7  | 1.02 [0.99-1.06]                                    | 1.00 [0.97-1.02]  | 0.83 [0.72-0.97]  | 0.93 [0.90-0.97]*             | 0.91 [0.89-0.94]* | 0.71 [0.61-0.83]* |
| Pancreatic cancer         | 10,846  | 933     | 1,710  | 63    | 61,239,895   | 6,640,609  | 7,317,273 | 235,170 | 0.2                           | 0.1  | 0.2  | 0.3  | 1.03 [0.94-1.13]                                    | 1.05 [0.98-1.12]  | 1.14 [0.80-1.62]  | 0.87 [0.79-0.95]*             | 0.91 [0.85-0.98]* | 0.96 [0.67-1.38]  |
| Non-Hodgkin lymphoma      | 16,834  | 1,692   | 3,031  | 247   | 86,338,584   | 12,424,494 | 9,214,794 | 271,288 | 0.2                           | 0.1  | 0.3  | 0.9  | 1.18 [1.10-1.26]*                                   | 1.26 [1.19-1.32]* | 2.99 [2.44-3.67]* | 0.98 [0.92-1.05]              | 1.08 [1.02-1.14]* | 2.40 [1.95-2.97]* |
| Hodgkin lymphoma          | 2,031   | 332     | 518    | 25    | 86,499,683   | 12,433,423 | 9,232,218 | 272,705 | 0.0                           | 0.0  | 0.1  | 0.1  | 1.53 [1.31-1.78]*                                   | 2.05 [1.80-2.34]* | 3.06 [1.62-5.77]* | 1.13 [0.95-1.35]              | 1.58 [1.37-1.82]* | 2.02 [1.03-3.98]  |
| Myeloma                   | 6,989   | 609     | 1,145  | 36    | 86,496,646   | 12,434,320 | 9,232,490 | 272,718 | 0.1                           | 0.0  | 0.1  | 0.1  | 1.06 [0.95-1.18]                                    | 1.12 [1.03-1.22]* | 0.92 [0.59-1.45]  | 0.93 [0.83-1.04]              | 0.98 [0.90-1.06]  | 0.70 [0.44-1.11]  |
| CNS cancers               | 18,273  | 1,834   | 2,625  | 94    | 86,372,194   | 12,424,802 | 9,222,229 | 272,373 | 0.2                           | 0.1  | 0.3  | 0.3  | 1.02 [0.96-1.09]                                    | 1.03 [0.98-1.09]  | 1.10 [0.83-1.45]  | 0.87 [0.81-0.93]*             | 0.89 [0.85-0.94]* | 0.85 [0.64-1.13]  |
| Melanoma                  | 36,664  | 3,537   | 5,433  | 198   | 85,842,328   | 12,391,904 | 9,166,167 | 270,364 | 0.4                           | 0.3  | 0.6  | 0.7  | 1.06 [1.02-1.11]*                                   | 1.05 [1.02-1.09]* | 1.09 [0.90-1.33]  | 1.00 [0.95-1.04]              | 0.99 [0.95-1.03]  | 0.95 [0.78-1.16]  |
| Nonmelanoma skin cancer   | 175,588 | 16,460  | 29,747 | 1,382 | 83,933,378   | 12,273,300 | 8,932,476 | 260,623 | 2.1                           | 1.3  | 3.3  | 5.3  | 1.08 [1.05-1.10]*                                   | 1.12 [1.10-1.14]* | 1.64 [1.52-1.77]* | 1.02 [1.00-1.04]              | 1.06 [1.05-1.08]* | 1.48 [1.37-1.60]* |
| <b>Neurological</b>       |         |         |        |       |              |            |           |         |                               |      |      |      |                                                     |                   |                   |                               |                   |                   |
| Alzheimer's dementia      | 67,260  | 5,852   | 10,908 | 340   | 39,266,331   | 3,817,460  | 4,925,947 | 174,731 | 1.7                           | 1.5  | 2.2  | 1.9  | 1.03 [0.99-1.06]                                    | 1.03 [1.00-1.06]  | 1.10 [0.95-1.27]  | 1.00 [0.96-1.04]              | 1.00 [0.98-1.03]  | 1.05 [0.91-1.22]  |
| Vascular dementia         | 37,659  | 3,478   | 6,304  | 174   | 39,465,238   | 3,831,130  | 4,945,359 | 175,369 | 1.0                           | 0.9  | 1.3  | 1.0  | 1.05 [1.00-1.10]                                    | 1.07 [1.03-1.11]* | 1.09 [0.88-1.35]  | 0.96 [0.92-1.01]              | 0.99 [0.95-1.03]  | 0.98 [0.79-1.22]  |
| Epilepsy                  | 50,917  | 8,715   | 6,574  | 229   | 84,799,914   | 12,294,877 | 9,094,294 | 267,726 | 0.6                           | 0.7  | 0.7  | 0.9  | 1.12 [1.09-1.16]*                                   | 1.18 [1.14-1.22]* | 1.48 [1.23-1.78]* | 1.01 [0.97-1.04]              | 1.03 [0.99-1.07]  | 1.06 [0.87-1.28]  |
| Migraine                  | 269,624 | 50,317  | 39,268 | 1,103 | 79,588,116   | 11,804,793 | 8,563,456 | 249,441 | 3.4                           | 4.3  | 4.6  | 4.4  | 1.16 [1.15-1.18]*                                   | 1.18 [1.16-1.19]* | 1.15 [1.05-1.25]* | 1.12 [1.11-1.14]*             | 1.13 [1.11-1.15]* | 1.03 [0.95-1.13]  |
| Multiple sclerosis        | 6,980   | 866     | 936    | 33    | 60,989,085   | 6,624,344  | 7,297,474 | 234,343 | 0.1                           | 0.1  | 0.1  | 0.1  | 1.14 [1.03-1.25]*                                   | 1.04 [0.95-1.14]  | 0.92 [0.58-1.46]  | 1.04 [0.95-1.15]              | 0.94 [0.86-1.03]  | 0.71 [0.44-1.14]  |
| Parkinson's disease       | 27,442  | 2,449   | 4,059  | 109   | 39,337,778   | 3,827,177  | 4,937,813 | 175,116 | 0.7                           | 0.6  | 0.8  | 0.6  | 1.04 [0.99-1.10]                                    | 0.99 [0.94-1.03]  | 0.82 [0.63-1.05]  | 0.99 [0.94-1.05]              | 0.94 [0.90-0.98]* | 0.75 [0.58-0.97]  |
| Peripheral neuropathies   | 464,270 | 61,511  | 83,936 | 2,933 | 49,880,855   | 5,814,907  | 6,015,448 | 180,698 | 9.3                           | 10.6 | 14.0 | 16.2 | 1.16 [1.15-1.18]*                                   | 1.21 [1.20-1.23]* | 1.31 [1.25-1.39]* | 1.12 [1.11-1.14]*             | 1.17 [1.16-1.18]* | 1.20 [1.14-1.27]* |
| <b>Digestive system</b>   |         |         |        |       |              |            |           |         |                               |      |      |      |                                                     |                   |                   |                               |                   |                   |
| Abdominal hernia          | 188,874 | 22,751  | 30,204 | 1,058 | 81,367,055   | 11,998,005 | 8,776,837 | 256,044 | 2.3                           | 1.9  | 3.4  | 4.1  | 1.10 [1.08-1.12]*                                   | 1.13 [1.11-1.14]* | 1.25 [1.15-1.36]* | 1.05 [1.03-1.07]*             | 1.07 [1.05-1.09]* | 1.10 [1.01-1.20]  |
| Appendicitis              | 70,087  | 12,418  | 8,107  | 236   | 84,806,448   | 12,285,394 | 9,102,410 | 267,906 | 0.8                           | 1.0  | 0.9  | 0.9  | 1.07 [1.04-1.10]*                                   | 1.04 [1.01-1.08]* | 1.13 [0.94-1.36]  | 0.93 [0.91-0.96]*             | 0.89 [0.86-0.92]* | 0.74 [0.61-0.90]* |
| Barrett's oesophagus      | 27,807  | 2,749   | 5,021  | 193   | 60,825,650   | 6,615,304  | 7,267,974 | 232,861 | 0.5                           | 0.4  | 0.7  | 0.8  | 1.09 [1.04-1.15]*                                   | 1.20 [1.15-1.25]* | 1.46 [1.19-1.78]* | 0.94 [0.89-0.99]              | 1.03 [0.99-1.07]  | 1.12 [0.91-1.38]  |
| Coeliac disease           | 19,167  | 3,856   | 3,337  | 101   | 86,144,296   | 12,398,330 | 9,193,597 | 270,823 | 0.2                           | 0.3  | 0.4  | 0.4  | 1.31 [1.25-1.37]*                                   | 1.55 [1.47-1.63]* | 1.42 [1.07-1.90]  | 1.17 [1.11-1.23]*             | 1.36 [1.29-1.44]* | 1.01 [0.74-1.38]  |
| Crohn's disease           | 11,874  | 2,245   | 2,415  | 375   | 86,157,628   | 12,415,540 | 9,204,808 | 248,179 | 0.1                           | 0.2  | 0.3  | 1.5  | 1.44 [1.35-1.53]*                                   | 1.57 [1.48-1.67]* | 7.58 [5.85-9.82]* | 1.14 [1.06-1.22]*             | 1.29 [1.20-1.38]* | 4.92 [3.74-6.47]* |
| Diverticular disease      | 201,955 | 21,521  | 37,085 | 1,586 | 58,032,259   | 6,429,695  | 6,929,883 | 218,588 | 3.5                           | 3.3  | 5.4  | 7.3  | 1.12 [1.10-1.14]*                                   | 1.18 [1.16-1.20]* | 1.37 [1.28-1.48]* | 1.01 [0.99-1.03]              | 1.07 [1.06-1.09]* | 1.15 [1.07-1.24]* |
| Gastritis and duodenitis  | 225,572 | 32,461  | 38,784 | 1,728 | 82,242,104   | 12,080,262 | 8,761,565 | 250,541 | 2.7                           | 2.7  | 4.4  | 6.9  | 1.17 [1.15-1.19]*                                   | 1.22 [1.20-1.24]* | 1.71 [1.59-1.84]* | 1.07 [1.05-1.08]*             | 1.11 [1.09-1.13]* | 1.39 [1.29-1.49]* |
| Gastro oesophageal reflux | 336,990 | 50,332  | 60,606 | 2,060 | 78,092,572   | 11,629,111 | 8,390,929 | 240,190 | 4.3                           | 4.3  | 7.2  | 8.6  | 1.22 [1.20-1.23]*                                   | 1.26 [1.24-1.27]* | 1.27 [1.19-1.35]* | 1.15 [1.14-1.17]*             | 1.19 [1.17-1.20]* | 1.11 [1.05-1.19]* |
| Irritable bowel syndrome  | 166,652 | 29,947  | 29,223 | 654   | 80,708,246   | 11,955,442 | 8,627,782 | 250,175 | 2.1                           | 2.5  | 3.4  | 2.6  | 1.29 [1.27-1.31]*                                   | 1.31 [1.29-1.33]* | 1.03 [0.92-1.14]  | 1.24 [1.22-1.26]*             | 1.25 [1.23-1.27]* | 0.90 [0.81-1.01]  |
| Oesophagitis              | 156,201 | 20,150  | 29,242 | 1,126 | 81,932,969   | 12,093,532 | 8,733,800 | 251,587 | 1.9                           | 1.7  | 3.3  | 4.5  | 1.20 [1.18-1.23]*                                   | 1.25 [1.23-1.27]* | 1.54 [1.42-1.68]* | 1.11 [1.09-1.13]*             | 1.14 [1.12-1.16]* | 1.26 [1.15-1.37]* |

| Outcome                      | Event  |        |        |       | Person-years |            |           |         | Rate (per 1,000 person-years) |      |      |      | Hazard ratio (99% confidence interval) <sup>‡</sup> |                   |                    |                               |                   |                   |
|------------------------------|--------|--------|--------|-------|--------------|------------|-----------|---------|-------------------------------|------|------|------|-----------------------------------------------------|-------------------|--------------------|-------------------------------|-------------------|-------------------|
|                              | unexp. | mild   | mod    | sev.  | unexposed    | mild       | moderate  | severe  | unexp.                        | mild | mod. | sev. | comorbidity-adjusted                                |                   |                    | + hospital-admission-adjusted |                   |                   |
|                              |        |        |        |       |              |            |           |         |                               |      |      |      | mild                                                | moderate          | severe             | mild                          | moderate          | severe            |
| Pancreatitis                 | 24,188 | 2,674  | 4,038  | 208   | 86,146,621   | 12,412,032 | 9,196,622 | 270,591 | 0.3                           | 0.2  | 0.4  | 0.8  | 1.05 [0.99-1.11]                                    | 1.12 [1.07-1.17]* | 1.56 [1.26-1.93]*  | 0.89 [0.85-0.95]*             | 0.96 [0.91-1.00]  | 1.19 [0.96-1.49]  |
| Peptic ulcer disease         | 46,429 | 4,841  | 8,064  | 390   | 85,406,187   | 12,369,807 | 9,123,197 | 267,096 | 0.5                           | 0.4  | 0.9  | 1.5  | 1.09 [1.05-1.13]*                                   | 1.17 [1.14-1.21]* | 1.77 [1.52-2.06]*  | 0.95 [0.91-0.99]*             | 1.03 [1.00-1.07]  | 1.36 [1.17-1.59]* |
| Peritonitis                  | 8,556  | 922    | 1,270  | 115   | 86,405,485   | 12,427,935 | 9,225,173 | 271,377 | 0.1                           | 0.1  | 0.1  | 0.4  | 1.02 [0.93-1.12]                                    | 1.03 [0.95-1.11]  | 3.04 [2.21-4.18]*  | 0.84 [0.77-0.93]*             | 0.88 [0.81-0.95]* | 1.99 [1.44-2.76]* |
| Ulcerative colitis           | 16,573 | 2,464  | 3,021  | 310   | 85,987,330   | 12,404,905 | 9,186,120 | 254,361 | 0.2                           | 0.2  | 0.3  | 1.2  | 1.30 [1.22-1.37]*                                   | 1.38 [1.31-1.46]* | 3.76 [3.01-4.69]*  | 1.12 [1.06-1.19]*             | 1.19 [1.12-1.25]* | 2.62 [2.08-3.31]* |
| <b>Liver</b>                 |        |        |        |       |              |            |           |         |                               |      |      |      |                                                     |                   |                    |                               |                   |                   |
| Autoimmune liver disease     | 3,946  | 486    | 728    | 116   | 86,476,529   | 12,433,716 | 9,231,398 | 269,582 | 0.0                           | 0.0  | 0.1  | 0.4  | 1.15 [1.01-1.31]                                    | 1.29 [1.16-1.43]* | 6.93 [4.54-10.58]* | 1.02 [0.89-1.16]              | 1.14 [1.02-1.27]  | 5.32 [3.46-8.18]* |
| Cholecystitis                | 43,144 | 4,728  | 7,070  | 309   | 85,879,139   | 12,392,048 | 9,166,046 | 269,714 | 0.5                           | 0.4  | 0.8  | 1.1  | 1.07 [1.03-1.11]*                                   | 1.10 [1.06-1.14]* | 1.36 [1.16-1.60]*  | 0.93 [0.89-0.97]*             | 0.96 [0.93-0.99]  | 1.09 [0.93-1.28]  |
| Fatty liver                  | 93,163 | 12,052 | 18,162 | 1,005 | 85,692,787   | 12,365,210 | 9,120,529 | 266,646 | 1.1                           | 1.0  | 2.0  | 3.8  | 1.14 [1.11-1.17]*                                   | 1.29 [1.26-1.31]* | 1.78 [1.61-1.96]*  | 1.07 [1.05-1.10]*             | 1.20 [1.18-1.23]* | 1.54 [1.40-1.71]* |
| Fibrosis/sclerosis/cirrhosis | 18,142 | 2,005  | 3,735  | 239   | 61,017,753   | 6,627,845  | 7,294,327 | 232,809 | 0.3                           | 0.3  | 0.5  | 1.0  | 1.11 [1.03-1.19]*                                   | 1.33 [1.27-1.40]* | 2.53 [2.01-3.20]*  | 0.95 [0.88-1.02]              | 1.16 [1.10-1.23]* | 2.08 [1.64-2.64]* |
| Oesophageal varices          | 5,531  | 567    | 1,136  | 95    | 61,207,760   | 6,638,838  | 7,313,764 | 234,379 | 0.1                           | 0.1  | 0.2  | 0.4  | 1.07 [0.93-1.23]                                    | 1.22 [1.11-1.35]* | 3.05 [2.04-4.54]*  | 0.85 [0.73-0.99]              | 1.01 [0.91-1.12]  | 2.56 [1.67-3.92]* |

<sup>‡</sup> Hazard ratios (99% confidence intervals) estimated from Cox models comparing people with mild, moderate or severe eczema to those without eczema. \* indicates that the result is significant under Bonferroni-correction.

## Supplementary Table 5: Most commonly occurring codes

| Outcome                  | Numbered list of the most commonly occurring codes with rounded number of occurrences and cumulative percentage of all occurrences                                                                                                                                                                                                                                                                                                                                                                                                                                                                                                                                                                                                                                                                                                                                                                                                                                                                                                                                                                                                                                                                                                                                                                                                                                                                                                                                                                                                                                                                                                                                                                                                                                                                                                                                                                                                                                                                                                                                                                                                                                                                     |
|--------------------------|--------------------------------------------------------------------------------------------------------------------------------------------------------------------------------------------------------------------------------------------------------------------------------------------------------------------------------------------------------------------------------------------------------------------------------------------------------------------------------------------------------------------------------------------------------------------------------------------------------------------------------------------------------------------------------------------------------------------------------------------------------------------------------------------------------------------------------------------------------------------------------------------------------------------------------------------------------------------------------------------------------------------------------------------------------------------------------------------------------------------------------------------------------------------------------------------------------------------------------------------------------------------------------------------------------------------------------------------------------------------------------------------------------------------------------------------------------------------------------------------------------------------------------------------------------------------------------------------------------------------------------------------------------------------------------------------------------------------------------------------------------------------------------------------------------------------------------------------------------------------------------------------------------------------------------------------------------------------------------------------------------------------------------------------------------------------------------------------------------------------------------------------------------------------------------------------------------|
| ADHD                     | 1. Attention deficit hyperactivity disorder 639,300 (72.5%); 2. Attention deficit with hyperactivity 65,400 (79.9%); 3. Child attention deficit disorder 55,200 (86.1%); 4. Hyperactive behaviour 35,900 (90.2%); 5. Attention deficit disorder 33,000 (94.0%)                                                                                                                                                                                                                                                                                                                                                                                                                                                                                                                                                                                                                                                                                                                                                                                                                                                                                                                                                                                                                                                                                                                                                                                                                                                                                                                                                                                                                                                                                                                                                                                                                                                                                                                                                                                                                                                                                                                                         |
| Abdominal hernia         | 1. Inguinal hernia 782,300 (22.1%); 2. Primary repair of inguinal hernia 557,200 (37.8%); 3. Umbilical hernia 484,300 (51.4%); 4. Right inguinal hernia 322,200 (60.5%); 5. Left inguinal hernia 246,000 (67.4%); 6. Repair of umbilical hernia 177,700 (72.4%); 7. Paraumbilical hernia 141,900 (76.4%); 8. Primary mesh repair of inguinal hernia 61,300 (78.2%); 9. Inguinal hernia NOS 46,700 (79.5%); 10. Ventral hernia 44,500 (80.7%); 11. Bilateral inguinal hernia repair 39,400 (81.8%); 12. Primary laparoscopic repair of inguinal hernia 36,200 (82.9%); 13. Femoral hernia 35,300 (83.9%); 14. Hernia of abdominal cavity 30,100 (84.7%); 15. Repair of recurrent inguinal hernia 28,400 (85.5%); 16. Primary repair of inguinal hernia NOS 26,700 (86.3%); 17. Simple umbilical hernia 26,300 (87.0%); 18. H/O: abdominal hernia 25,000 (87.7%); 19. Inguinal herniotomy 24,100 (88.4%); 20. Primary repair of femoral hernia 23,600 (89.0%); 21. Uncomplicated inguinal hernia 21,900 (89.7%)                                                                                                                                                                                                                                                                                                                                                                                                                                                                                                                                                                                                                                                                                                                                                                                                                                                                                                                                                                                                                                                                                                                                                                                          |
| Alcohol abuse            | 1. Alcohol dependence syndrome 1,142,800 (34.5%); 2. Alcohol problem drinking 847,100 (60.1%); 3. Alcoholic cirrhosis of liver 329,200 (70.0%); 4. Alcohol detoxification 167,200 (75.1%); 5. Alcoholism 155,400 (79.8%); 6. Alcohol dependence syndrome NOS 109,200 (83.1%); 7. Alcohol withdrawal syndrome 88,300 (85.7%); 8. Alcohol dependence 70,000 (87.8%); 9. Chronic alcoholism 62,800 (89.7%)                                                                                                                                                                                                                                                                                                                                                                                                                                                                                                                                                                                                                                                                                                                                                                                                                                                                                                                                                                                                                                                                                                                                                                                                                                                                                                                                                                                                                                                                                                                                                                                                                                                                                                                                                                                                |
| Allergic Conjunctivitis  | 1. Atopic conjunctivitis 586,100 (82.3%); 2. Chronic allergic conjunctivitis 76,200 (93.1%); 3. Acute allergic conjunctivitis 30,100 (97.3%); 4. Acute atopic conjunctivitis 12,800 (99.1%); 5. Seasonal allergic conjunctivitis 4,000 (99.6%)                                                                                                                                                                                                                                                                                                                                                                                                                                                                                                                                                                                                                                                                                                                                                                                                                                                                                                                                                                                                                                                                                                                                                                                                                                                                                                                                                                                                                                                                                                                                                                                                                                                                                                                                                                                                                                                                                                                                                         |
| Allergic Rhinitis        | 1. Hay fever - pollens 2,515,300 (30.7%); 2. Allergic rhinitis 1,339,900 (47.0%); 3. Hay fever 1,126,700 (60.8%); 4. Allergic rhinitis due to allergen 676,900 (69.0%); 5. Allergic rhinitis due to pollens 588,800 (76.2%); 6. H/O: hay fever 583,200 (83.3%); 7. Allergic rhinitis due to pollen 253,100 (86.4%); 8. Perennial allergic rhinitis 247,600 (89.5%)                                                                                                                                                                                                                                                                                                                                                                                                                                                                                                                                                                                                                                                                                                                                                                                                                                                                                                                                                                                                                                                                                                                                                                                                                                                                                                                                                                                                                                                                                                                                                                                                                                                                                                                                                                                                                                     |
| Alopecia Areata          | 1. Alopecia areata 206,300 (95.9%); 2. [X]Other alopecia areata 8,700 (100.0%); 3. Ophiasis 0 (100.0%); 4. Ophiasis 0 (100.0%)                                                                                                                                                                                                                                                                                                                                                                                                                                                                                                                                                                                                                                                                                                                                                                                                                                                                                                                                                                                                                                                                                                                                                                                                                                                                                                                                                                                                                                                                                                                                                                                                                                                                                                                                                                                                                                                                                                                                                                                                                                                                         |
| Alzheimer's dementia     | 1. Alzheimer's disease 803,600 (54.6%); 2. [X]Dementia in Alzheimer's disease 324,400 (76.6%); 3. [X]Dementia in Alzheimer's dis, atypical or mixed type 118,600 (84.6%); 4. Dementia in Alzheimer's disease with late onset 56,300 (88.5%); 5. [X]Alzheimer's dementia unspc 54,500 (92.2%)                                                                                                                                                                                                                                                                                                                                                                                                                                                                                                                                                                                                                                                                                                                                                                                                                                                                                                                                                                                                                                                                                                                                                                                                                                                                                                                                                                                                                                                                                                                                                                                                                                                                                                                                                                                                                                                                                                           |
| Anxiety                  | 1. Mixed anxiety and depressive disorder 18,609,100 (55.2%); 2. Anxiety disorder 6,194,400 (73.6%); 3. Anxiety state 1,161,500 (77.0%); 4. Panic attack 922,700 (79.7%); 5. [X]Mixed anxiety and depressive disorder 706,800 (81.8%); 6. Anxiousness 684,900 (83.9%); 7. Generalised anxiety disorder 7 item score 631,700 (85.7%); 8. Anxiousness - symptom 603,400 (87.5%); 9. [X]Anxiety NOS 550,600 (89.2%)                                                                                                                                                                                                                                                                                                                                                                                                                                                                                                                                                                                                                                                                                                                                                                                                                                                                                                                                                                                                                                                                                                                                                                                                                                                                                                                                                                                                                                                                                                                                                                                                                                                                                                                                                                                        |
| Appendicitis             | 1. Appendicectomy 415,900 (43.3%); 2. Emergency appendicectomy 164,800 (60.4%); 3. Acute appendicitis 105,200 (71.4%); 4. Emergency appendicectomy NEC 38,000 (75.3%); 5. Appendicitis 30,700 (78.5%); 6. Excision of appendix 29,500 (81.6%); 7. Emergency excision of appendix 24,200 (84.1%); 8. Laparoscopic appendicectomy 22,500 (86.4%); 9. Other excision of appendix NOS 20,700 (88.6%)                                                                                                                                                                                                                                                                                                                                                                                                                                                                                                                                                                                                                                                                                                                                                                                                                                                                                                                                                                                                                                                                                                                                                                                                                                                                                                                                                                                                                                                                                                                                                                                                                                                                                                                                                                                                       |
| Asthma                   | 1. Asthma 20,390,400 (15.8%); 2. Asthma annual review 12,636,600 (25.6%); 3. Asthma not disturbing sleep 8,515,200 (32.2%); 4. Asthma not limiting activities 8,182,100 (38.6%); 5. Asthma management 5,969,400 (43.2%); 6. Asthma medication review 5,688,400 (47.6%); 7. Asthma never causes daytime symptoms 4,757,100 (51.3%); 8. Asthma monitoring check done 4,690,400 (55.0%); 9. Asthma monitoring call first letter 4,570,900 (58.5%); 10. Asthma monitoring by nurse 2,183,300 (60.2%); 11. Asthma causes daytime symptoms 1 to 2 times per month 2,129,400 (61.8%); 12. Asthma causes daytime symptoms most days 2,058,600 (63.4%); 13. Asthma causes daytime symptoms 1 to 2 times per week 1,984,300 (65.0%); 14. Asthma self-management plan agreed 1,984,000 (66.5%); 15. Asthma control test score 1,942,500 (68.0%); 16. Asthma monitoring call second letter 1,910,900 (69.5%); 17. Number of asthma exacerbations in past year 1,792,700 (70.9%); 18. Acute exacerbation of asthma 1,725,400 (72.2%); 19. Asthma never disturbs sleep 1,719,300 (73.6%); 20. Asthma monitoring 1,534,400 (74.8%); 21. Asthma limiting activities 1,496,200 (75.9%); 22. Asthma daytime symptoms 1,465,700 (77.1%); 23. Asthma never restricts exercise 1,365,300 (78.1%); 24. Asthma follow-up 1,362,900 (79.2%); 25. Asthma sometimes restricts exercise 1,332,800 (80.2%); 26. Asthma disturbing sleep 1,295,800 (81.2%); 27. Emergency asthma patient visit since last encounter 1,247,600 (82.2%); 28. Asthma monitoring call third letter 1,052,600 (83.0%); 29. Asthma control step 2 1,039,200 (83.8%); 30. H/O: asthma 1,009,900 (84.6%); 31. Asthma monitoring invitation SMS (short message service) text message 973,200 (85.3%); 32. Asthma monitoring by doctor 893,600 (86.0%); 33. Excepted from asthma quality indicators - informed dissent 892,100 (86.7%); 34. Asthma treatment compliance satisfactory 824,700 (87.4%); 35. Health education - asthma 728,000 (87.9%); 36. Asthma control step 3 688,000 (88.5%); 37. Asthma self-management plan review 567,000 (88.9%); 38. Asthma NOS 521,100 (89.3%); 39. Patient has a written asthma personal action plan 490,700 (89.7%) |
| Autism                   | 1. Autistic spectrum disorder 178,300 (24.9%); 2. Asperger's syndrome 163,300 (47.7%); 3. Autism 107,500 (62.6%); 4. Autism spectrum disorder 93,600 (75.7%); 5. Autistic disorder 78,300 (86.6%)                                                                                                                                                                                                                                                                                                                                                                                                                                                                                                                                                                                                                                                                                                                                                                                                                                                                                                                                                                                                                                                                                                                                                                                                                                                                                                                                                                                                                                                                                                                                                                                                                                                                                                                                                                                                                                                                                                                                                                                                      |
| Autoimmune liver disease | 1. Primary biliary cirrhosis 167,000 (53.3%); 2. Autoimmune hepatitis 98,700 (84.7%); 3. Primary sclerosing cholangitis 32,600 (95.1%); 4. Autoimmune chronic active hepatitis 15,000 (99.9%); 5. Primary biliary cholangitis 300 (100.0%)                                                                                                                                                                                                                                                                                                                                                                                                                                                                                                                                                                                                                                                                                                                                                                                                                                                                                                                                                                                                                                                                                                                                                                                                                                                                                                                                                                                                                                                                                                                                                                                                                                                                                                                                                                                                                                                                                                                                                             |
| Barrett's oesophagus     | 1. Barrett's oesophagus 691,000 (71.3%); 2. Barrett's oesophagus 255,400 (97.6%); 3. Barrett's ulcer of oesophagus 22,000 (99.9%); 4. Barrett esophagus 400 (99.9%); 5. Barretts esophagus 300 (100.0%)                                                                                                                                                                                                                                                                                                                                                                                                                                                                                                                                                                                                                                                                                                                                                                                                                                                                                                                                                                                                                                                                                                                                                                                                                                                                                                                                                                                                                                                                                                                                                                                                                                                                                                                                                                                                                                                                                                                                                                                                |

| Outcome                 | Numbered list of the most commonly occurring codes with rounded number of occurrences and cumulative percentage of all occurrences                                                                                                                                                                                                                                                                                                                                                                                                                                                                                                                                                                                                                                                                                                                                                                                                                                                                                                                                                                                                                                                                                                                                                                                                                                                                                                                                      |
|-------------------------|-------------------------------------------------------------------------------------------------------------------------------------------------------------------------------------------------------------------------------------------------------------------------------------------------------------------------------------------------------------------------------------------------------------------------------------------------------------------------------------------------------------------------------------------------------------------------------------------------------------------------------------------------------------------------------------------------------------------------------------------------------------------------------------------------------------------------------------------------------------------------------------------------------------------------------------------------------------------------------------------------------------------------------------------------------------------------------------------------------------------------------------------------------------------------------------------------------------------------------------------------------------------------------------------------------------------------------------------------------------------------------------------------------------------------------------------------------------------------|
| Breast cancer           | 1. Malignant neoplasm of female breast 3,077,800 (70.7%); 2. Ca female breast 542,100 (83.2%); 3. Malignant neoplasm of female breast NOS 204,100 (87.9%); 4. [RFC] Breast cancer 76,600 (89.6%); 5. Malignant tumour of breast 69,400 (91.2%)                                                                                                                                                                                                                                                                                                                                                                                                                                                                                                                                                                                                                                                                                                                                                                                                                                                                                                                                                                                                                                                                                                                                                                                                                          |
| CNS cancers             | 1. Malignant neoplasm of brain 115,600 (16.8%); 2. Cerebral meningioma 62,900 (26.0%); 3. Glioblastoma 61,300 (34.9%); 4. Glioblastoma multiforme 54,700 (42.8%); 5. Schwannoma 49,200 (50.0%); 6. [M]Astrocytoma NOS 34,400 (55.0%); 7. Secondary malignant neoplasm of brain 32,200 (59.7%); 8. Meningioma 30,200 (64.1%); 9. [M]Glioma NOS 20,200 (67.0%); 10. Malignant glioma 19,800 (69.9%); 11. Oligodendroglioma - category 15,400 (72.1%); 12. Malignant neoplasm of brain NOS 13,700 (74.1%); 13. Anaplastic astrocytoma 12,700 (76.0%); 14. [M]Gliomas 12,600 (77.8%); 15. [M]Glioma NOS 12,200 (79.6%); 16. Ependymoma - category 11,400 (81.2%); 17. Pilocytic astrocytoma 10,100 (82.7%); 18. Medulloblastoma 8,000 (83.9%); 19. Malignant neoplasm of frontal lobe 6,700 (84.9%); 20. [M]Meningioma NOS 6,600 (85.8%); 21. Cerebral tumour - malignant 5,700 (86.6%); 22. Astrocytoma 5,400 (87.4%); 23. Anaplastic oligodendroglioma 5,100 (88.2%); 24. Secondary malignant neoplasm of brain and spinal cord 4,700 (88.8%); 25. Paranglioma 4,400 (89.5%)                                                                                                                                                                                                                                                                                                                                                                                              |
| COPD                    | 1. Chronic obstructive pulmonary disease 5,454,200 (23.1%); 2. Chronic obstructive pulmonary disease annual review 4,009,500 (40.1%); 3. Number of chronic obstructive pulmonary disease exacerbations in past year 1,809,600 (47.8%); 4. Chronic obstructive pulmonary disease monitoring 1,290,000 (53.3%); 5. Chronic obstructive pulmonary disease monitoring first letter 1,167,000 (58.2%); 6. Acute exacerbation of chronic obstructive airways disease 1,082,100 (62.8%); 7. Chronic obstructive pulmonary disease assessment test score 959,000 (66.9%); 8. Moderate chronic obstructive pulmonary disease 954,600 (70.9%); 9. COPD self-management plan given 850,700 (74.5%); 10. Mild chronic obstructive pulmonary disease 756,300 (77.7%); 11. Severe chronic obstructive pulmonary disease 536,100 (80.0%); 12. Chronic obstructive airway disease 416,100 (81.8%); 13. Chronic obstructive pulmonary disease monitoring second letter 367,900 (83.3%); 14. Chronic obstructive lung disease 294,600 (84.6%); 15. Issue of chronic obstructive pulmonary disease rescue pack 257,200 (85.7%); 16. COPD medication review 228,300 (86.6%); 17. Chronic obstructive pulmonary disease self-management plan agreed 183,400 (87.4%); 18. Chronic obstructive pulmonary disease follow-up 180,800 (88.2%); 19. COAD - Chronic obstructive airways disease 171,100 (88.9%); 20. Chronic obstructive pulmonary disease clinical management plan 165,700 (89.6%) |
| Cholecystitis           | 1. Acute cholecystitis 202,600 (58.8%); 2. Cholecystitis 82,600 (82.8%); 3. Chronic cholecystitis 30,700 (91.7%); 4. Gallbladder calculus with acute cholecystitis 7,900 (94.0%); 5. Empyema of gallbladder 4,100 (95.1%)                                                                                                                                                                                                                                                                                                                                                                                                                                                                                                                                                                                                                                                                                                                                                                                                                                                                                                                                                                                                                                                                                                                                                                                                                                               |
| Cigarette smoking       | 1. Smoking cessation advice 43,453,800 (35.8%); 2. Cigarette smoker 21,309,600 (53.4%); 3. Smoking cessation education 14,267,400 (65.2%); 4. Current smoker 13,615,700 (76.4%); 5. Moderate cigarette smoker (10-19 cigs/day) 2,686,300 (78.6%); 6. Trying to give up smoking 2,300,000 (80.5%); 7. Light cigarette smoker (1-9 cigs/day) 2,235,200 (82.3%); 8. Tobacco smoking consumption 1,505,600 (83.6%); 9. Rolls own cigarettes 1,283,200 (84.6%); 10. Seen by smoking cessation advisor 1,214,600 (85.6%); 11. Heavy cigarette smoker (20-39 cigs/day) 1,136,600 (86.6%); 12. Referral to smoking cessation advisor 1,086,400 (87.5%); 13. Not interested in stopping smoking 1,034,300 (88.3%); 14. Smoking cessation advice declined 999,600 (89.2%); 15. Nicotine replacement therapy 909,800 (89.9%)                                                                                                                                                                                                                                                                                                                                                                                                                                                                                                                                                                                                                                                       |
| Coeliac disease         | 1. Coeliac disease 544,700 (91.2%); 2. Gluten intolerance 21,800 (94.8%); 3. Coeliac disease NOS 9,400 (96.4%); 4. Coeliac disease annual review 6,500 (97.5%); 5. Coeliac disease monitoring 3,900 (98.1%)                                                                                                                                                                                                                                                                                                                                                                                                                                                                                                                                                                                                                                                                                                                                                                                                                                                                                                                                                                                                                                                                                                                                                                                                                                                             |
| Coronary artery disease | 1. Ischaemic heart disease 4,902,100 (32.2%); 2. Framingham coronary heart disease 10 year risk score 2,542,400 (49.0%); 3. Coronary heart disease annual review 2,185,000 (63.3%); 4. Coronary heart disease monitoring 1st letter 1,645,700 (74.1%); 5. IHD - Ischaemic heart disease 1,238,400 (82.3%); 6. Primary prevention of ischaemic heart disease 395,100 (84.9%); 7. Coronary heart disease monitoring 2nd letter 381,200 (87.4%); 8. Coronary heart disease risk 236,300 (88.9%)                                                                                                                                                                                                                                                                                                                                                                                                                                                                                                                                                                                                                                                                                                                                                                                                                                                                                                                                                                            |
| Crohn's disease         | 1. Crohn's disease 739,600 (70.6%); 2. Crohn's regional enteritis 207,900 (90.5%); 3. CC - Crohn's colitis 40,900 (94.4%); 4. Crohn's disease of terminal ileum 16,200 (95.9%); 5. Regional enteritis - Crohn 11,700 (97.0%)                                                                                                                                                                                                                                                                                                                                                                                                                                                                                                                                                                                                                                                                                                                                                                                                                                                                                                                                                                                                                                                                                                                                                                                                                                            |
| Cutaneous warts         | 1. Verruca plantaris 1,659,100 (24.6%); 2. Viral wart 1,216,000 (42.6%); 3. Plantar wart 767,500 (54.0%); 4. Hand wart 577,800 (62.5%); 5. Seborrhoeic wart 370,300 (68.0%); 6. Plain wart 346,900 (73.1%); 7. Seborrhoeic wart 295,800 (77.5%); 8. Seborrhoeic wart 274,400 (81.6%); 9. Genital warts 260,700 (85.4%); 10. Verruca vulgaris 206,000 (88.5%)                                                                                                                                                                                                                                                                                                                                                                                                                                                                                                                                                                                                                                                                                                                                                                                                                                                                                                                                                                                                                                                                                                            |
| Depression              | 1. Mixed anxiety and depressive disorder 18,609,100 (33.1%); 2. Depression 5,639,500 (43.1%); 3. Low mood 5,469,100 (52.9%); 4. Depressive disorder 4,668,000 (61.2%); 5. Depression interim review 3,236,600 (66.9%); 6. Depressed 2,810,500 (71.9%); 7. Depressed mood 1,558,600 (74.7%); 8. Depression medication review 1,268,400 (77.0%); 9. H/O: depression 1,255,900 (79.2%); 10. Depressive episode 966,600 (80.9%); 11. [X]Moderate depressive episode 781,100 (82.3%); 12. [X]Mixed anxiety and depressive disorder 706,800 (83.6%); 13. Reactive depression (situational) 678,400 (84.8%); 14. [X]Depressive episode, unspecified 642,200 (85.9%); 15. Postpartum depression 573,500 (86.9%); 16. Symptoms of depression 502,700 (87.8%); 17. C/O - feeling depressed 485,900 (88.7%); 18. Depressive episode 425,700 (89.5%)                                                                                                                                                                                                                                                                                                                                                                                                                                                                                                                                                                                                                                |
| Dermatophyte infection  | 1. Fungal nail infection 1,473,100 (27.0%); 2. Athlete's foot 608,000 (38.1%); 3. Dermatophytosis 458,300 (46.5%); 4. Ringworm 448,000 (54.7%); 5. Dermatophytosis of nail 338,800 (60.9%); 6. Tinea pedis 337,000 (67.0%); 7. Tinea cruris 326,500 (73.0%); 8. Onychomycosis 289,600 (78.3%); 9. Tinea corporis 248,000 (82.9%); 10. Dermatophytosis of foot 230,100 (87.1%); 11. Dermatophytosis of the body 113,700 (89.1%)                                                                                                                                                                                                                                                                                                                                                                                                                                                                                                                                                                                                                                                                                                                                                                                                                                                                                                                                                                                                                                          |
| Diabetes mellitus       | 1. Type 2 diabetes mellitus 22,645,700 (27.4%); 2. Diabetic annual review 8,575,500 (37.8%); 3. O/E - Right diabetic foot at low risk 7,472,900 (46.9%); 4. O/E - Left diabetic foot at low risk 7,433,600 (55.9%); 5. Diabetes mellitus 4,912,200 (61.9%); 6. Diabetic on oral treatment 4,810,900 (67.7%); 7. Type 1 diabetes mellitus 2,238,400 (70.4%); 8. Diabetic on diet only 1,698,500 (72.5%); 9. Type II diabetic dietary review 1,523,000 (74.3%); 10. Diabetic on insulin 1,379,800 (76.0%); 11. O/E - Right diabetic foot at moderate risk 1,323,500 (77.6%); 12. O/E - Left diabetic foot at                                                                                                                                                                                                                                                                                                                                                                                                                                                                                                                                                                                                                                                                                                                                                                                                                                                              |

| Outcome                      | Numbered list of the most commonly occurring codes with rounded number of occurrences and cumulative percentage of all occurrences                                                                                                                                                                                                                                                                                                                                                                                                                                                                                                                                                                                                                                                                                                                                                                                                                                                                                                                                                                                   |
|------------------------------|----------------------------------------------------------------------------------------------------------------------------------------------------------------------------------------------------------------------------------------------------------------------------------------------------------------------------------------------------------------------------------------------------------------------------------------------------------------------------------------------------------------------------------------------------------------------------------------------------------------------------------------------------------------------------------------------------------------------------------------------------------------------------------------------------------------------------------------------------------------------------------------------------------------------------------------------------------------------------------------------------------------------------------------------------------------------------------------------------------------------|
|                              | moderate risk 1,316,700 (79.2%); 13. Agreeing on diabetes care plan 1,265,300 (80.7%); 14. Diabetes self-management plan agreed 1,142,400 (82.1%); 15. Background diabetic retinopathy 820,000 (83.1%); 16. Diabetes management plan given 763,600 (84.0%); 17. Diabetic foot examination 703,100 (84.9%); 18. Diabetes medication review 703,000 (85.7%); 19. Patient on maximal tolerated therapy for diabetes 655,900 (86.5%); 20. Non-insulin dependent diabetes mellitus 650,000 (87.3%); 21. Type II diabetes mellitus 620,400 (88.0%); 22. Insulin treated Type 2 diabetes mellitus 556,900 (88.7%); 23. O/E - right eye background diabetic retinopathy 537,600 (89.4%)                                                                                                                                                                                                                                                                                                                                                                                                                                      |
| Diverticular disease         | 1. Diverticular disease 809,600 (31.4%); 2. Diverticulosis 745,800 (60.3%); 3. Diverticulitis 573,900 (82.5%); 4. Diverticula of intestine 152,100 (88.4%); 5. Diverticular disease of colon 132,500 (93.5%)                                                                                                                                                                                                                                                                                                                                                                                                                                                                                                                                                                                                                                                                                                                                                                                                                                                                                                         |
| Dyslipidaemia                | 1. Pure hypercholesterolaemia 2,694,100 (33.9%); 2. Hyperlipidaemia 2,020,100 (59.4%); 3. Mixed hyperlipidaemia 560,800 (66.5%); 4. Lipid-lowering therapy 448,300 (72.1%); 5. Patient on maximal tolerated lipid lowering therapy 390,000 (77.0%); 6. Hyperlipidaemia screen 269,300 (80.4%); 7. Disorder of lipid metabolism 257,000 (83.6%); 8. Hypercholesterolaemia 244,400 (86.7%); 9. Serum lipids high 142,100 (88.5%)                                                                                                                                                                                                                                                                                                                                                                                                                                                                                                                                                                                                                                                                                       |
| Eosinophilic Oesophagitis    | 1. Eosinophilic oesophagitis 22,900 (99.9%); 2. Eosinophilic esophagitis 0 (100.0%)                                                                                                                                                                                                                                                                                                                                                                                                                                                                                                                                                                                                                                                                                                                                                                                                                                                                                                                                                                                                                                  |
| Epilepsy                     | 1. Epilepsy 2,319,900 (38.1%); 2. Epilepsy medication review 1,277,000 (59.1%); 3. Epilepsy monitoring 596,400 (68.9%); 4. Generalised epilepsy 201,800 (72.2%); 5. No epilepsy drug side effects 134,400 (74.4%); 6. Epilepsy NOS 118,100 (76.4%); 7. Temporal lobe epilepsy 110,400 (78.2%); 8. Contraceptive advice for patients with epilepsy 97,500 (79.8%); 9. Follow-up epilepsy assessment 89,000 (81.2%); 10. H/O: epilepsy 78,700 (82.5%); 11. Pre-conception advice for patients with epilepsy 67,700 (83.6%); 12. Pregnancy advice for patients with epilepsy 67,600 (84.8%); 13. Seen in epilepsy clinic 64,600 (85.8%); 14. Epilepsy monitoring call first letter 45,500 (86.6%); 15. Petit mal (minor) epilepsy 41,400 (87.3%); 16. Complex partial epileptic seizure 39,900 (87.9%); 17. Pregnancy advice for patients with epilepsy not indicated 35,600 (88.5%); 18. Epilepsy management plan given 34,700 (89.1%); 19. Contraceptive advice for patients with epilepsy not indicated 34,500 (89.6%)                                                                                               |
| Fatty liver                  | 1. Non-alcoholic fatty liver 323,400 (47.0%); 2. Fatty liver 168,200 (71.5%); 3. Steatosis of liver 75,700 (82.5%); 4. Fatty change of liver 49,100 (89.6%); 5. Alcoholic fatty liver 44,600 (96.1%)                                                                                                                                                                                                                                                                                                                                                                                                                                                                                                                                                                                                                                                                                                                                                                                                                                                                                                                 |
| Fibrosis/sclerosis/cirrhosis | 1. Alcoholic cirrhosis of liver 329,200 (29.9%); 2. Alcoholic liver damage 181,000 (46.4%); 3. Cirrhosis of liver 174,600 (62.2%); 4. Primary biliary cirrhosis 167,000 (77.4%); 5. Cirrhosis and chronic liver disease 105,300 (87.0%)                                                                                                                                                                                                                                                                                                                                                                                                                                                                                                                                                                                                                                                                                                                                                                                                                                                                              |
| Food allergy                 | 1. Nut allergy 224,800 (25.9%); 2. Food allergy 199,200 (48.9%); 3. Allergy to peanuts 140,000 (65.1%); 4. Allergy to eggs 122,100 (79.1%); 5. H/O: food allergy 71,600 (87.4%)                                                                                                                                                                                                                                                                                                                                                                                                                                                                                                                                                                                                                                                                                                                                                                                                                                                                                                                                      |
| Gastritis and duodenitis     | 1. Gastritis 961,500 (39.5%); 2. Gastritis and duodenitis 387,800 (55.4%); 3. Acute gastritis 320,700 (68.5%); 4. Duodenitis 241,800 (78.5%); 5. [X]Other gastritis 117,900 (83.3%); 6. Helicobacter-associated gastritis 78,500 (86.5%); 7. Chronic gastritis 66,700 (89.3%)                                                                                                                                                                                                                                                                                                                                                                                                                                                                                                                                                                                                                                                                                                                                                                                                                                        |
| Gastro oesophageal reflux    | 1. Reflux oesophagitis 2,436,800 (35.5%); 2. Gastro-oesophageal reflux 1,984,900 (64.4%); 3. Acid reflux 768,000 (75.6%); 4. Gastric reflux 349,200 (80.7%); 5. Oesophageal reflux 268,800 (84.6%); 6. Gastrooesophageal reflux disease 242,700 (88.2%)                                                                                                                                                                                                                                                                                                                                                                                                                                                                                                                                                                                                                                                                                                                                                                                                                                                              |
| Heart failure                | 1. Heart failure 920,900 (19.2%); 2. Congestive heart failure 679,200 (33.3%); 3. Left ventricular failure 668,000 (47.2%); 4. Congestive cardiac failure 488,500 (57.4%); 5. Left ventricular systolic dysfunction 279,100 (63.2%); 6. Echocardiogram shows left ventricular systolic dysfunction 184,100 (67.1%); 7. Heart failure annual review 181,200 (70.8%); 8. Seen in heart failure clinic 156,700 (74.1%); 9. Impaired left ventricular function 115,400 (76.5%); 10. Seen by community heart failure nurse 94,000 (78.5%); 11. Heart failure monitoring first letter 81,800 (80.2%); 12. Referral to heart failure clinic 62,700 (81.5%); 13. Heart failure 6 month review 60,400 (82.7%); 14. Pulmonary oedema 55,700 (83.9%); 15. Impaired left ventricular function 54,700 (85.0%); 16. Heart failure review completed 50,200 (86.1%); 17. Cardiac failure 37,500 (86.9%); 18. Left ventricular diastolic dysfunction 35,900 (87.6%); 19. Heart failure follow-up 35,100 (88.3%); 20. Echocardiogram shows left ventricular diastolic dysfunction 34,200 (89.0%); 21. Heart failure NOS 34,200 (89.8%) |
| Herpes simplex               | 1. Herpes simplex 418,000 (26.1%); 2. Cold sore (herpetic) 406,000 (51.4%); 3. Genital herpes simplex 277,200 (68.7%); 4. Herpes labialis 64,300 (72.8%); 5. O/E-herpes labialis-cold sore 61,800 (76.6%); 6. O/E - cold sore 53,900 (80.0%); 7. Herpetic gingivostomatitis 50,600 (83.1%); 8. Genital herpes unspecified 48,800 (86.2%); 9. Eczema herpeticum - Kaposi's varicelliform eruption 30,100 (88.1%); 10. Herpes simplex viral infection 28,200 (89.8%)                                                                                                                                                                                                                                                                                                                                                                                                                                                                                                                                                                                                                                                   |
| Hip fracture                 | 1. Fracture of neck of femur 1,040,000 (66.9%); 2. Hip fracture 207,800 (80.3%); 3. Closed fracture of neck of femur 76,400 (85.2%); 4. Primary open reduction and internal fixation of proximal femoral fracture with screw/nail and plate device 43,400 (88.0%); 5. Primary open reduction of fracture of neck of femur and open fixation using dynamic hip screw 33,200 (90.1%)                                                                                                                                                                                                                                                                                                                                                                                                                                                                                                                                                                                                                                                                                                                                   |
| Hodgkin lymphoma             | 1. Hodgkin's disease 110,900 (63.7%); 2. Hodgkin lymphoma 13,100 (71.2%); 3. Hodgkin's disease, nodular sclerosis 9,500 (76.7%); 4. Hodgkin's disease (clinical) 9,100 (81.9%); 5. Hodgkin lymphoma 5,000 (84.8%); 6. [M]Hodgkin's disease 4,200 (87.2%); 7. Hodgkin's disease NOS 2,300 (88.6%); 8. Hodgkin lymphoma, nodular sclerosis 2,300 (89.8%)                                                                                                                                                                                                                                                                                                                                                                                                                                                                                                                                                                                                                                                                                                                                                               |
| Hypertension                 | 1. Essential hypertension 35,271,200 (61.1%); 2. Hypertensive disease 10,600,000 (79.4%); 3. Hypertension annual review 4,693,700 (87.5%); 4. Hypertension six month review 1,240,200 (89.7%); 5. Hypertension 969,300 (91.4%)                                                                                                                                                                                                                                                                                                                                                                                                                                                                                                                                                                                                                                                                                                                                                                                                                                                                                       |
| Impetigo                     | 1. Impetigo 2,513,600 (93.8%); 2. Impetigo NOS 129,700 (98.6%); 3. Impetigo contagiosa unspecified 10,400 (99.0%); 4. Bullous impetigo 8,400 (99.3%); 5. Impetigo follicularis 5,500 (99.5%)                                                                                                                                                                                                                                                                                                                                                                                                                                                                                                                                                                                                                                                                                                                                                                                                                                                                                                                         |

| <b>Outcome</b>           | <b>Numbered list of the most commonly occurring codes with rounded number of occurrences and cumulative percentage of all occurrences</b>                                                                                                                                                                                                                                                                                                                                                                                                                                                                                                                                                                                                                                                                                                                                                                                                                                                                                                                                                                                                                                                                                                                                                                                                                                                                                                                                                                                                                                                                                                                                                                                                                                                                                                                                                                 |
|--------------------------|-----------------------------------------------------------------------------------------------------------------------------------------------------------------------------------------------------------------------------------------------------------------------------------------------------------------------------------------------------------------------------------------------------------------------------------------------------------------------------------------------------------------------------------------------------------------------------------------------------------------------------------------------------------------------------------------------------------------------------------------------------------------------------------------------------------------------------------------------------------------------------------------------------------------------------------------------------------------------------------------------------------------------------------------------------------------------------------------------------------------------------------------------------------------------------------------------------------------------------------------------------------------------------------------------------------------------------------------------------------------------------------------------------------------------------------------------------------------------------------------------------------------------------------------------------------------------------------------------------------------------------------------------------------------------------------------------------------------------------------------------------------------------------------------------------------------------------------------------------------------------------------------------------------|
| Irritable bowel syndrome | 1. Irritable bowel syndrome 2,523,300 (72.6%); 2. Irritable colon - Irritable bowel syndrome 709,000 (93.0%); 3. Irritable colon 97,200 (95.8%); 4. Irritable bowel syndrome with diarrhoea 64,400 (97.7%); 5. Irritable bowel - IBS 57,500 (99.3%)                                                                                                                                                                                                                                                                                                                                                                                                                                                                                                                                                                                                                                                                                                                                                                                                                                                                                                                                                                                                                                                                                                                                                                                                                                                                                                                                                                                                                                                                                                                                                                                                                                                       |
| Lung cancer              | 1. Lung cancer 612,400 (33.4%); 2. Malignant tumour of lung 505,400 (61.0%); 3. Malignant neoplasm of lower respiratory tract 221,200 (73.1%); 4. Secondary malignant neoplasm of lung 67,400 (76.8%); 5. Primary malignant neoplasm of lung 65,600 (80.4%); 6. Malignant neoplasm of upper lobe of lung 53,700 (83.3%); 7. Malignant neoplasm of upper lobe, bronchus or lung 47,900 (85.9%); 8. Malignant neoplasm of main bronchus 40,700 (88.2%)                                                                                                                                                                                                                                                                                                                                                                                                                                                                                                                                                                                                                                                                                                                                                                                                                                                                                                                                                                                                                                                                                                                                                                                                                                                                                                                                                                                                                                                      |
| Melanoma                 | 1. Malignant melanoma of skin 471,100 (36.5%); 2. Malignant neoplasm of skin 201,700 (52.1%); 3. Malignant melanoma 69,500 (57.5%); 4. Excision of melanoma 59,300 (62.0%); 5. Lentigo maligna 52,200 (66.1%); 6. Malignant melanoma of lower leg 26,000 (68.1%); 7. Malignant neoplasm of skin NOS 24,300 (70.0%); 8. Malignant melanoma of back 22,100 (71.7%); 9. History of primary malignant neoplasm of skin 18,700 (73.1%); 10. Superficial spreading melanoma 16,400 (74.4%); 11. Malignant neoplasm of skin of lower limb and hip 14,500 (75.5%); 12. H/O Malignant melanoma 14,100 (76.6%); 13. Melanoma in situ 12,500 (77.6%); 14. Melanoma in situ of skin 11,300 (78.5%); 15. Malignant melanoma of thigh 10,200 (79.2%); 16. Malignant melanoma of lower limb and hip 9,900 (80.0%); 17. Malignant melanoma of skin NOS 9,800 (80.8%); 18. Malignant neoplasm of skin of trunk 9,500 (81.5%); 19. [M]Lentigo maligna melanoma 9,500 (82.2%); 20. Malignant neoplasm of skin of nose (external) 8,200 (82.9%); 21. Malignant melanoma of skin of trunk 8,100 (83.5%); 22. Malignant melanoma of upper arm 7,700 (84.1%); 23. Malignant melanoma of eye 7,400 (84.7%); 24. Malignant neoplasm of skin of upper limb and shoulder 6,700 (85.2%); 25. Malignant neoplasm of skin of cheek, external 6,000 (85.7%); 26. Nodular melanoma 5,900 (86.1%); 27. Malignant neoplasm of scalp 5,800 (86.6%); 28. Malignant melanoma of upper limb 5,700 (87.0%); 29. Malignant neoplasm of skin of forehead 5,700 (87.4%); 30. Malignant melanoma of fore-arm 5,000 (87.8%); 31. Malignant neoplasm of skin of lower leg 4,800 (88.2%); 32. Malignant melanoma of choroid 4,700 (88.6%); 33. Malignant melanoma of breast 4,700 (88.9%); 34. Malignant melanoma of scalp and neck 4,000 (89.2%); 35. Malignant melanoma of neck 3,800 (89.5%); 36. Malignant neoplasm of skin of temple 3,800 (89.8%) |
| Metabolic syndrome       | 1. Cardiac syndrome X 18,800 (56.5%); 2. Metabolic syndrome 10,900 (89.2%); 3. Metabolic syndrome X 3,300 (98.9%); 4. Reaven's syndrome 300 (99.9%); 5. Reaven's syndrome 100 (100.0%)                                                                                                                                                                                                                                                                                                                                                                                                                                                                                                                                                                                                                                                                                                                                                                                                                                                                                                                                                                                                                                                                                                                                                                                                                                                                                                                                                                                                                                                                                                                                                                                                                                                                                                                    |
| Migraine                 | 1. Migraine 4,230,600 (76.7%); 2. H/O: migraine 352,900 (83.1%); 3. Migraine with typical aura 299,900 (88.6%); 4. Migraine NOS 190,400 (92.0%); 5. Migraine with aura 67,900 (93.3%)                                                                                                                                                                                                                                                                                                                                                                                                                                                                                                                                                                                                                                                                                                                                                                                                                                                                                                                                                                                                                                                                                                                                                                                                                                                                                                                                                                                                                                                                                                                                                                                                                                                                                                                     |
| Molluscum contagiosum    | 1. Molluscum contagiosum infection 1,070,300 (99.0%); 2. Molluscum contagiosum infection of eyelid 5,800 (99.5%); 3. [SHHAPT] Molluscum contagiosum 4,900 (100.0%); 4. Genital Molluscum contagiosum 0 (100.0%); 5. Molluscum Contagiosum 0 (100.0%)                                                                                                                                                                                                                                                                                                                                                                                                                                                                                                                                                                                                                                                                                                                                                                                                                                                                                                                                                                                                                                                                                                                                                                                                                                                                                                                                                                                                                                                                                                                                                                                                                                                      |
| Multiple sclerosis       | 1. Multiple sclerosis 768,900 (87.6%); 2. [RFC] Multiple sclerosis 24,400 (90.4%); 3. Relapsing remitting multiple sclerosis 15,800 (92.2%); 4. Multiple sclerosis NOS 15,600 (93.9%); 5. Multiple sclerosis - relapsing remitting 12,000 (95.3%)                                                                                                                                                                                                                                                                                                                                                                                                                                                                                                                                                                                                                                                                                                                                                                                                                                                                                                                                                                                                                                                                                                                                                                                                                                                                                                                                                                                                                                                                                                                                                                                                                                                         |
| Myeloma                  | 1. Multiple myeloma 367,400 (70.1%); 2. [M]Myeloma NOS 89,100 (87.1%); 3. Plasmacytoma 15,100 (90.0%); 4. [M]Plasma cell myeloma 10,900 (92.0%); 5. Lambda light chain myeloma 10,400 (94.0%)                                                                                                                                                                                                                                                                                                                                                                                                                                                                                                                                                                                                                                                                                                                                                                                                                                                                                                                                                                                                                                                                                                                                                                                                                                                                                                                                                                                                                                                                                                                                                                                                                                                                                                             |
| Myocardial infarction    | 1. Acute myocardial infarction 1,389,800 (49.9%); 2. Acute non-ST segment elevation myocardial infarction 487,700 (67.5%); 3. MI - acute myocardial infarction 281,900 (77.6%); 4. Acute ST segment elevation myocardial infarction 203,700 (84.9%); 5. Acute myocardial infarction of inferior wall 86,900 (88.0%); 6. Old myocardial infarction 50,800 (89.8%)                                                                                                                                                                                                                                                                                                                                                                                                                                                                                                                                                                                                                                                                                                                                                                                                                                                                                                                                                                                                                                                                                                                                                                                                                                                                                                                                                                                                                                                                                                                                          |
| Non-Hodgkin lymphoma     | 1. Non-Hodgkin's lymphoma 208,300 (23.9%); 2. [M]Lymphoma NOS 104,500 (35.9%); 3. Diffuse large B-cell lymphoma 50,800 (41.7%); 4. [M]Non-Hodgkin's lymphoma 46,300 (47.0%); 5. Follicular lymphoma NOS 45,200 (52.2%); 6. B-cell non-Hodgkin's lymphoma 39,900 (56.8%); 7. Follicular non-Hodgkin's lymphoma 33,500 (60.6%); 8. Malignant lymphoma 32,700 (64.3%); 9. Malignant neoplasm lymphatic or haematopoietic tissue NOS 28,300 (67.6%); 10. Non hodgkin lymphoma 25,800 (70.5%); 11. Non-Hodgkin's lymphoma (clinical) 21,300 (73.0%); 12. Malignant lymphoma (clinical) 17,200 (74.9%); 13. Mantle cell lymphoma 17,000 (76.9%); 14. Malignant lymphoma 16,300 (78.8%); 15. Non-Hodgkin lymphoma (category) 13,200 (80.3%); 16. [M]Malignant lymphoma, non-Hodgkin's type 12,500 (81.7%); 17. [M] Cutaneous lymphoma 7,700 (82.6%); 18. Follicular lymphoma 7,700 (83.5%); 19. Suspected lymphoma 7,200 (84.3%); 20. Burkitt's lymphoma 7,100 (85.1%); 21. [X]Non-Hodgkin's lymphoma NOS 5,800 (85.8%); 22. Low grade B-cell lymphoma 5,300 (86.4%); 23. [M]Lymphocytic lymphoma NOS 5,200 (87.0%); 24. Malignant lymphoma NOS 5,200 (87.6%); 25. Monocytoid B-cell lymphoma 4,800 (88.1%); 26. [M]Malignant lymphoma, lymphoplasmacytoid type 4,400 (88.6%); 27. [M]Lymphomas, NOS or diffuse 4,200 (89.1%); 28. Peripheral T-cell lymphoma 4,000 (89.6%); 29. Cutaneous T-cell lymphoma 3,500 (90.0%)                                                                                                                                                                                                                                                                                                                                                                                                                                                                                         |
| Nonmelanoma skin cancer  | 1. Basal cell carcinoma of skin 2,654,800 (56.1%); 2. Squamous cell carcinoma - category 585,100 (68.5%); 3. Bowen's disease of skin 404,700 (77.0%); 4. Squamous cell carcinoma of skin 314,100 (83.7%); 5. Basal cell carcinoma 235,000 (88.7%)                                                                                                                                                                                                                                                                                                                                                                                                                                                                                                                                                                                                                                                                                                                                                                                                                                                                                                                                                                                                                                                                                                                                                                                                                                                                                                                                                                                                                                                                                                                                                                                                                                                         |
| Obesity                  | 1. Obesity 1,901,800 (35.1%); 2. Body mass index 30+ - obesity 1,802,300 (68.5%); 3. Obesity monitoring 502,000 (77.7%); 4. Intervention for risk to health associated with overweight and obesity, general advice on healthy weight and lifestyle 260,400 (82.5%); 5. Morbid obesity 153,100 (85.4%); 6. Follow-up obesity assessment 149,200 (88.1%)                                                                                                                                                                                                                                                                                                                                                                                                                                                                                                                                                                                                                                                                                                                                                                                                                                                                                                                                                                                                                                                                                                                                                                                                                                                                                                                                                                                                                                                                                                                                                    |
| Oesophagitis             | 1. Reflux oesophagitis 2,436,800 (45.0%); 2. Oesophagitis 1,320,100 (69.4%); 3. Barrett's oesophagus 691,000 (82.1%); 4. Barrett's oesophagus 255,400 (86.9%); 5. Gastro-oesophageal reflux disease without oesophagitis 229,400 (91.1%)                                                                                                                                                                                                                                                                                                                                                                                                                                                                                                                                                                                                                                                                                                                                                                                                                                                                                                                                                                                                                                                                                                                                                                                                                                                                                                                                                                                                                                                                                                                                                                                                                                                                  |

| Outcome                   | Numbered list of the most commonly occurring codes with rounded number of occurrences and cumulative percentage of all occurrences                                                                                                                                                                                                                                                                                                                                                                                                                                                                                                                                                                                                                                                                                                                                                                                                                                                                                                                                                                                                                                                                                                                                                                                                                                                                                                                |
|---------------------------|---------------------------------------------------------------------------------------------------------------------------------------------------------------------------------------------------------------------------------------------------------------------------------------------------------------------------------------------------------------------------------------------------------------------------------------------------------------------------------------------------------------------------------------------------------------------------------------------------------------------------------------------------------------------------------------------------------------------------------------------------------------------------------------------------------------------------------------------------------------------------------------------------------------------------------------------------------------------------------------------------------------------------------------------------------------------------------------------------------------------------------------------------------------------------------------------------------------------------------------------------------------------------------------------------------------------------------------------------------------------------------------------------------------------------------------------------|
| Oesophageal varices       | 1. Oesophageal varices 88,400 (54.2%); 2. Oesophageal varices with bleeding 26,400 (70.4%); 3. Oesophageal varices NOS 15,300 (79.7%); 4. Fiberoptic endoscopic banding of oesophageal varices 11,700 (86.9%); 5. Oesophageal varices in alcoholic cirrhosis of the liver 7,400 (91.5%)                                                                                                                                                                                                                                                                                                                                                                                                                                                                                                                                                                                                                                                                                                                                                                                                                                                                                                                                                                                                                                                                                                                                                           |
| Osteoporosis              | 1. Osteoporosis 2,565,700 (77.7%); 2. Pathological fracture due to osteoporosis 99,400 (80.7%); 3. Health education - osteoporosis 88,900 (83.4%); 4. Osteoporotic vertebral collapse 58,500 (85.1%); 5. Lumbar DXA scan result osteoporotic 46,300 (86.5%); 6. Seen in osteoporosis clinic 43,900 (87.9%); 7. Referral to osteoporosis clinic 30,100 (88.8%); 8. Osteoporosis NOS 28,300 (89.6%)                                                                                                                                                                                                                                                                                                                                                                                                                                                                                                                                                                                                                                                                                                                                                                                                                                                                                                                                                                                                                                                 |
| Pancreatic cancer         | 1. Malignant tumour of pancreas 289,700 (67.5%); 2. Malignant tumour of head of pancreas 51,700 (79.5%); 3. [M]Pancreatic adenomas and carcinomas 25,000 (85.4%); 4. Malignant neoplasm of pancreas NOS 23,200 (90.8%); 5. [M]Pancreatic adenoma or carcinoma NOS 12,300 (93.6%)                                                                                                                                                                                                                                                                                                                                                                                                                                                                                                                                                                                                                                                                                                                                                                                                                                                                                                                                                                                                                                                                                                                                                                  |
| Pancreatitis              | 1. Acute pancreatitis 187,400 (41.0%); 2. Chronic pancreatitis 123,800 (68.1%); 3. Pancreatitis 71,700 (83.8%); 4. Gallstone acute pancreatitis 25,300 (89.3%); 5. Alcohol-induced chronic pancreatitis 24,100 (94.6%)                                                                                                                                                                                                                                                                                                                                                                                                                                                                                                                                                                                                                                                                                                                                                                                                                                                                                                                                                                                                                                                                                                                                                                                                                            |
| Parkinson's disease       | 1. Parkinson's disease 1,141,900 (82.7%); 2. Dementia in Parkinsons disease 80,300 (88.5%); 3. Parkinson's disease NOS 69,900 (93.6%); 4. Seen by Parkinson's disease service 23,200 (95.3%); 5. Secondary parkinsonism 11,900 (96.1%)                                                                                                                                                                                                                                                                                                                                                                                                                                                                                                                                                                                                                                                                                                                                                                                                                                                                                                                                                                                                                                                                                                                                                                                                            |
| Pelvis fracture           | 1. Closed fracture pelvis, single pubic ramus 119,700 (25.4%); 2. Fracture or disruption of pelvis 48,400 (35.7%); 3. Closed fracture of pelvis 48,100 (45.9%); 4. Fracture of acetabulum 33,700 (53.1%); 5. Closed fracture pubis 33,300 (60.2%); 6. Closed fracture pelvis, multiple pubic rami - stable 31,900 (66.9%); 7. Fracture of pubis 28,000 (72.9%); 8. Fracture of coccyx 22,000 (77.6%); 9. Fracture of pubic rami 20,300 (81.9%); 10. Fracture of sacrum 14,600 (85.0%); 11. Closed fracture acetabulum 10,200 (87.1%); 12. Closed fracture sacrum 9,400 (89.1%)                                                                                                                                                                                                                                                                                                                                                                                                                                                                                                                                                                                                                                                                                                                                                                                                                                                                    |
| Peptic ulcer disease      | 1. Duodenal ulcer 308,100 (33.0%); 2. Gastric ulcer 202,000 (54.7%); 3. H/O: peptic ulcer 40,700 (59.0%); 4. Duodenal ulcer NOS 39,600 (63.3%); 5. Peptic ulcer 38,500 (67.4%); 6. Gastric erosions 37,200 (71.4%); 7. Gastric ulcer NOS 34,700 (75.1%); 8. Peptic ulcer NOS 29,400 (78.3%); 9. Peptic ulcer symptoms 16,200 (80.0%); 10. Chronic duodenal ulcer NOS 12,600 (81.3%); 11. Acute duodenal ulcer with haemorrhage 12,400 (82.7%); 12. Acute duodenal ulcer with perforation 11,100 (83.9%); 13. H/O: duodenal ulcer 10,900 (85.0%); 14. Duodenal erosion 9,000 (86.0%); 15. Closure of perforated duodenal ulcer 8,500 (86.9%); 16. Chronic duodenal ulcer 7,800 (87.7%); 17. Duodenal ulcer disease 7,600 (88.5%); 18. H/O: gastric ulcer 7,500 (89.3%)                                                                                                                                                                                                                                                                                                                                                                                                                                                                                                                                                                                                                                                                             |
| Peripheral artery disease | 1. Intermittent claudication 437,900 (38.0%); 2. Raynaud's phenomenon 166,200 (52.4%); 3. Peripheral vascular disease NOS 98,700 (60.9%); 4. Claudication 60,000 (66.1%); 5. Raynaud's disease 46,800 (70.2%); 6. Mixed diabetic ulcer - foot 45,000 (74.1%); 7. Percutaneous transluminal angioplasty of femoral artery 35,700 (77.2%); 8. Ischaemic ulcer diabetic foot 29,700 (79.8%); 9. Ischaemic leg 28,200 (82.2%); 10. Percutaneous transluminal angioplasty of iliac artery 18,400 (83.8%); 11. Gangrene of toe 17,000 (85.3%); 12. Femoral endarterectomy 13,800 (86.5%); 13. Peripheral ischaemic vascular disease 12,900 (87.6%); 14. Percutaneous angioplasty of popliteal artery 8,600 (88.3%); 15. Peripheral ischaemia 8,600 (89.1%); 16. Diabetic peripheral angiopathy 6,000 (89.6%)                                                                                                                                                                                                                                                                                                                                                                                                                                                                                                                                                                                                                                            |
| Peripheral neuropathies   | 1. Sciatica 3,168,700 (39.2%); 2. Carpal tunnel syndrome 1,502,900 (57.8%); 3. Lumbago with sciatica 699,600 (66.5%); 4. Peripheral neuropathy 353,700 (70.8%); 5. Bell's palsy 309,500 (74.7%); 6. Trigeminal neuralgia NOS 277,500 (78.1%); 7. CTS - Carpal tunnel syndrome 179,200 (80.3%); 8. Meralgia paraesthetica 107,900 (81.6%); 9. Trigeminal neuralgia 99,500 (82.9%); 10. Morton's metatarsalgia 91,900 (84.0%); 11. Acute vestibular neuronitis 79,500 (85.0%); 12. Brachial (cervical) neuritis 70,700 (85.9%); 13. Lumbar disc prolapse with radiculopathy 68,500 (86.7%); 14. Peripheral nerve disease 54,500 (87.4%); 15. Ulnar nerve entrapment 53,000 (88.0%); 16. Radiculopathy 51,300 (88.7%); 17. Ulnar neuropathy 38,800 (89.2%); 18. Cauda equina syndrome 36,400 (89.6%)                                                                                                                                                                                                                                                                                                                                                                                                                                                                                                                                                                                                                                                 |
| Peritonitis               | 1. Peritonitis 18,900 (14.7%); 2. Perforated diverticulum 17,700 (28.4%); 3. Acute duodenal ulcer with perforation 11,100 (37.1%); 4. Acute appendicitis with peritonitis 9,000 (44.1%); 5. Closure of perforated duodenal ulcer 8,500 (50.7%); 6. Perforated diverticulum of colon 8,500 (57.3%); 7. Acute gangrenous appendicitis 7,500 (63.1%); 8. Perforated chronic duodenal ulcer 5,600 (67.5%); 9. Acute gastric ulcer with perforation 2,800 (69.6%); 10. Duodenal ulcer with perforation 2,500 (71.6%); 11. Chronic duodenal ulcer with perforation 2,200 (73.3%); 12. Closure of perforated gastric ulcer 2,000 (74.9%); 13. Perforated diverticulum of intestine 1,800 (76.2%); 14. Subphrenic abscess 1,700 (77.6%); 15. Acute appendicitis without peritonitis 1,700 (78.9%); 16. Faecal peritonitis 1,600 (80.1%); 17. Acute peptic ulcer with perforation 1,600 (81.4%); 18. Retroperitoneal abscess 1,500 (82.5%); 19. Drainage of intraperitoneal abscess 1,200 (83.5%); 20. Acute peritonitis 1,200 (84.4%); 21. Spontaneous bacterial peritonitis 1,200 (85.4%); 22. Perforated diverticulum of large intestine 1,200 (86.3%); 23. Perforated chronic gastric ulcer 1,100 (87.1%); 24. Peritonitis - bacterial 1,100 (88.0%); 25. Peritonitis NOS 700 (88.6%); 26. Diverticular disease of both small and large intestine with perforation and abscess 700 (89.1%); 27. Peritoneal dialysis-associated peritonitis 700 (89.6%) |
| Prostate cancer           | 1. Malignant tumour of prostate 4,324,100 (93.4%); 2. Qcancer prostate cancer risk 80,200 (95.2%); 3. [RFC] Cancer of the prostate 51,200 (96.3%); 4. Gleason prostate grade 5-7 (medium) 36,800 (97.1%); 5. Gleason grade finding for prostatic cancer 29,000 (97.7%)                                                                                                                                                                                                                                                                                                                                                                                                                                                                                                                                                                                                                                                                                                                                                                                                                                                                                                                                                                                                                                                                                                                                                                            |
| Spine fracture            | 1. Fracture of lumbar vertebra 114,800 (13.4%); 2. Fracture of thoracic vertebra 98,200 (24.8%); 3. Closed fracture thoracic vertebra, wedge 86,500 (34.9%); 4. Closed fracture lumbar vertebra, wedge 67,300 (42.7%); 5. Closed fracture lumbar vertebra 63,000 (50.1%); 6. H/O: vertebral fracture 58,800 (56.9%); 7. Closed fracture of cervical spine 41,400 (61.8%); 8. Closed fracture thoracic vertebra 38,000 (66.2%); 9. Fracture of spine without mention of spinal cord injury 24,800 (69.1%); 10. Osteoporosis with pathological fracture of thoracic vertebrae 20,400 (71.5%); 11. Osteoporosis with pathological fracture of lumbar vertebrae 18,800 (73.7%); 12. Closed fracture of vertebral column 18,200 (75.8%); 13. Fracture of vertebra without spinal cord lesion 15,200 (77.6%); 14. Fracture of lumbar spine 14,500 (79.3%); 15. Fracture of cervical spine 11,600 (80.6%); 16. Fracture of thoracic spine 11,500 (81.9%); 17. Multiple fractures of thoracic spine 10,800 (83.2%); 18. Closed fracture axis, odontoid process 8,800 (84.2%); 19. Closed fracture lumbar                                                                                                                                                                                                                                                                                                                                                  |

| Outcome                 | Numbered list of the most commonly occurring codes with rounded number of occurrences and cumulative percentage of all occurrences                                                                                                                                                                                                                                                                                                                                                                                                                                                                                                                                                                                                                                                                                                                                                                                                                                               |
|-------------------------|----------------------------------------------------------------------------------------------------------------------------------------------------------------------------------------------------------------------------------------------------------------------------------------------------------------------------------------------------------------------------------------------------------------------------------------------------------------------------------------------------------------------------------------------------------------------------------------------------------------------------------------------------------------------------------------------------------------------------------------------------------------------------------------------------------------------------------------------------------------------------------------------------------------------------------------------------------------------------------|
|                         | vertebra, transverse process 5,600 (84.9%); 20. Fracture of second cervical vertebra 4,600 (85.4%); 21. Balloon kyphoplasty of fracture of spine 4,600 (85.9%); 22. Multiple fractures of cervical spine 4,300 (86.4%); 23. Fracture of spine with spinal cord lesion 4,200 (86.9%); 24. Closed multiple fractures of thoracic spine 4,200 (87.4%); 25. Fatigue fracture of vertebra 4,100 (87.9%); 26. Fracture of vertebral column 4,000 (88.4%); 27. Vertebroplasty of fracture of spine 3,600 (88.8%); 28. Closed fracture lumbar vertebra, burst 3,600 (89.2%); 29. Fracture of spine without mention of spinal cord lesion NOS 3,500 (89.6%); 30. Fixation of spinal fracture 3,300 (90.0%)                                                                                                                                                                                                                                                                                |
| Stroke                  | 1. Stroke monitoring 506,000 (19.8%); 2. Stroke/transient ischaemic attack monitoring first letter 404,900 (35.6%); 3. Seen in stroke clinic 232,700 (44.7%); 4. Cerebral infarction 184,100 (51.9%); 5. Stroke / transient ischaemic attack referral 160,500 (58.2%); 6. CVA - cerebrovascular accident due to cerebral artery occlusion 137,100 (63.6%); 7. Stroke/transient ischaemic attack monitoring second letter 116,400 (68.1%); 8. Cerebral arterial occlusion 112,700 (72.5%); 9. Stroke unspecified 92,200 (76.1%); 10. Referral to stroke clinic 90,600 (79.7%); 11. Stroke/transient ischaemic attack monitoring third letter 43,600 (81.4%); 12. Stroke 36,100 (82.8%); 13. Cerebellar infarction 35,600 (84.2%); 14. H/O: stroke 32,600 (85.5%); 15. Left sided cerebral infarction 32,400 (86.7%); 16. Stroke due to cerebral arterial occlusion 29,300 (87.9%); 17. [RFC] Stroke 28,400 (89.0%)                                                                |
| Thromboembolic diseases | 1. Deep venous thrombosis 738,400 (43.9%); 2. Deep vein thrombosis 187,000 (55.1%); 3. Phlebitis and thrombophlebitis 156,400 (64.4%); 4. Deep vein phlebitis and thrombophlebitis of the leg 149,200 (73.3%); 5. Thrombophlebitis 71,500 (77.5%); 6. H/O: Deep Vein Thrombosis 56,600 (80.9%); 7. Suspected deep vein thrombosis 48,600 (83.8%); 8. Deep vein thrombosis of lower limb 43,800 (86.4%); 9. Referral to deep vein thrombosis clinic 38,700 (88.7%); 10. Portal vein thrombosis 13,100 (89.5%)                                                                                                                                                                                                                                                                                                                                                                                                                                                                     |
| Ulcerative colitis      | 1. Ulcerative colitis 920,000 (79.7%); 2. Ulcerative colitis and/or proctitis 116,200 (89.8%); 3. Ulcerative proctitis 35,200 (92.8%); 4. Ulcerative proctocolitis 34,000 (95.8%); 5. H/O: ulcerative colitis 17,500 (97.3%)                                                                                                                                                                                                                                                                                                                                                                                                                                                                                                                                                                                                                                                                                                                                                     |
| Urticaria               | 1. Urticaria 1,496,100 (63.5%); 2. Allergic urticaria 304,700 (76.4%); 3. Urticaria NOS 116,000 (81.3%); 4. Angioneurotic oedema 115,700 (86.2%); 5. Idiopathic urticaria 86,700 (89.9%)                                                                                                                                                                                                                                                                                                                                                                                                                                                                                                                                                                                                                                                                                                                                                                                         |
| Vascular dementia       | 1. Vascular dementia 600,600 (91.5%); 2. [X]Vascular dementia, unspecified 23,400 (95.0%); 3. Mixed cortical and subcortical vascular dementia 10,900 (96.7%); 4. VAD - Vascular dementia 7,000 (97.8%); 5. Subcortical vascular dementia 6,000 (98.7%)                                                                                                                                                                                                                                                                                                                                                                                                                                                                                                                                                                                                                                                                                                                          |
| Wrist fracture          | 1. Closed fracture of distal end of radius 811,500 (17.9%); 2. Fracture of metacarpal bone 806,600 (35.8%); 3. Closed fracture of wrist 608,200 (49.2%); 4. Fracture of scaphoid bone of wrist 392,000 (57.9%); 5. Closed Colles' fracture 344,800 (65.5%); 6. Closed fracture of the scaphoid 217,000 (70.3%); 7. Closed fracture of metacarpal bone(s) 115,700 (72.8%); 8. Hand fracture - metacarpal bone 115,200 (75.4%); 9. Closed fracture finger metacarpal 106,400 (77.7%); 10. Fracture at wrist and hand level 83,700 (79.6%); 11. Fracture of other metacarpal bone 76,600 (81.3%); 12. Greenstick fracture of distal radius 73,900 (82.9%); 13. Closed fracture radial styloid 70,900 (84.5%); 14. Closed fracture radius and ulna, distal 66,700 (85.9%); 15. Closed reduction of fracture of wrist 46,900 (87.0%); 16. Closed fracture finger metacarpal neck 42,600 (87.9%); 17. Fracture of forearm 41,900 (88.9%); 18. Closed fracture navicular 37,900 (89.7%) |

*Supplementary Table 5: Numbered lists of the most commonly occurring codes with rounded number of occurrences and cumulative percentage of all occurrences (e.g., the code "Attention deficit hyperactivity disorder" makes up 72.5% of all codes for the ADHD outcome; the codes "Attention deficit hyperactivity disorder" and "Attention deficit with hyperactivity" together make up 79.9% of all codes for the ADHD outcome, etc...)*



Supplementary Figure 1: Comparison with previous studies

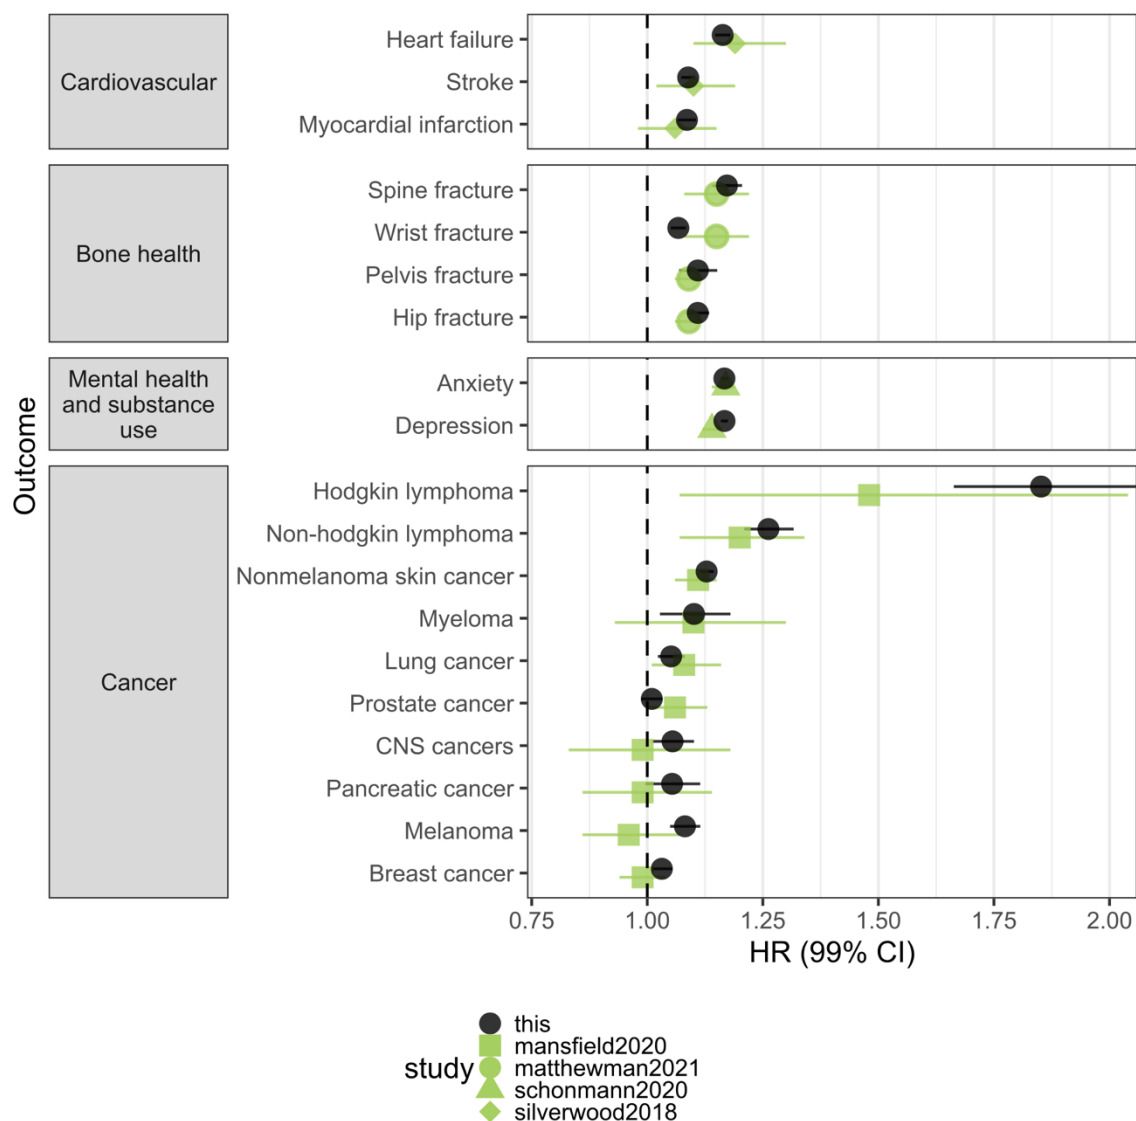

Supplementary Figure 1: Hazard ratios from Cox regression compared to results from previous studies using CPRD GOLD. mansfield2020: Mansfield KE, Schmidt SAJ, Darvalics B, et al. Association Between Atopic Eczema and Cancer in England and Denmark. *JAMA Dermatol* 2020; 156: 1086.

matthewman2021: Matthewman J, Tadrous M, Mansfield KE, et al. Association of Different Prescribing Patterns for Oral Corticosteroids With Fracture Preventive Care Among Older Adults in the UK and Ontario. *JAMA Dermatology* 2023; 159: 961–9.

schonmann2020: Schonmann Y, Mansfield KE, Hayes JF, et al. Atopic Eczema in Adulthood and Risk of Depression and Anxiety: A Population-Based Cohort Study. *The Journal of Allergy and Clinical Immunology: In Practice* 2020; 8: 248-257.e16.

silverwood2018: Silverwood RJ, Mansfield KE, Mulick A, et al. Atopic eczema in adulthood and mortality: UK population-based cohort study, 1998-2016. *J Allergy Clin Immunol* 2021; 147: 1753–63.

Supplementary Figure 2: Comparison with previous studies (eczema severity)

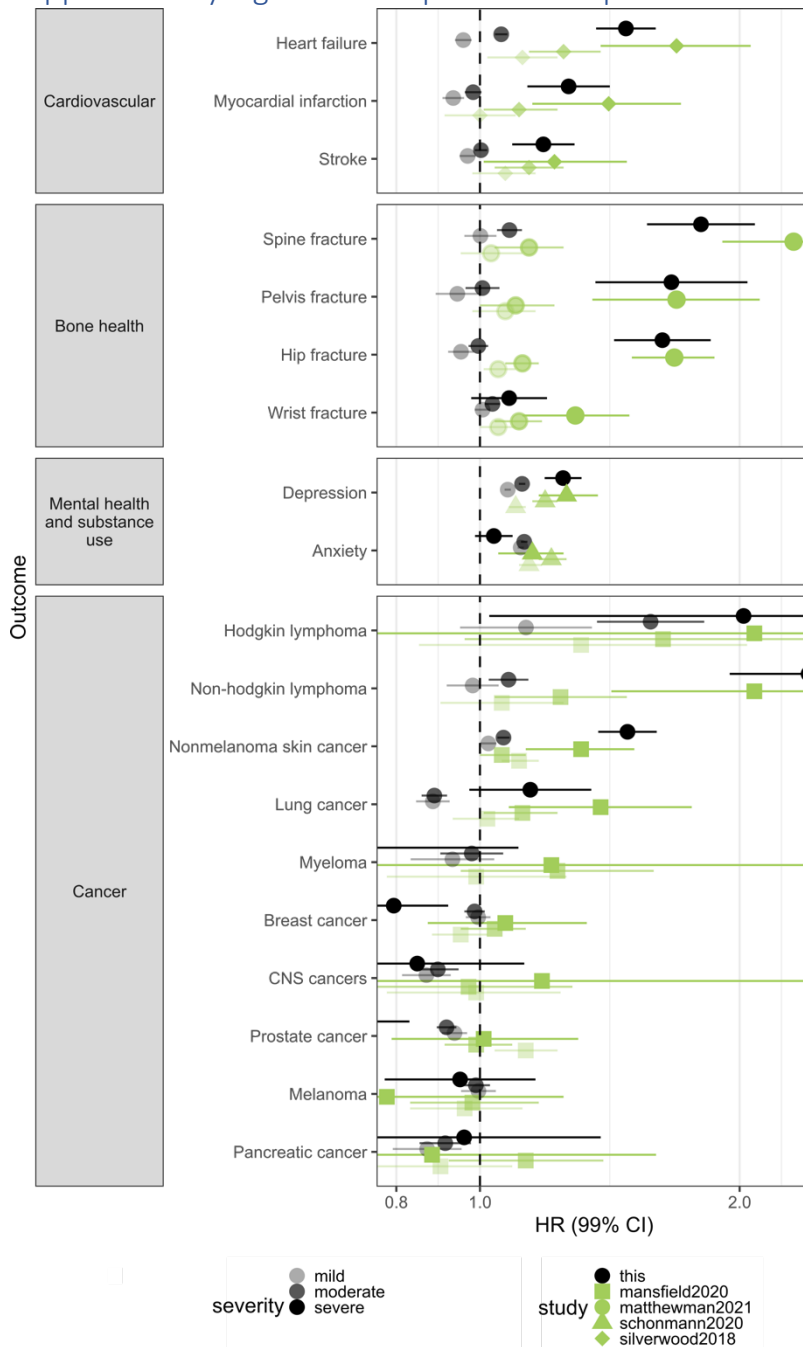

Supplementary Figure 2: Hazard ratios for mild, moderate and severe eczema from Cox regression compared to results from previous studies using CPRD GOLD. Results from this study are from comorbidity adjusted models additionally adjusted for time-updated secondary care admissions.

*mansfield2020*: Mansfield KE, Schmidt SAJ, Darvalics B, et al. Association Between Atopic Eczema and Cancer in England and Denmark. *JAMA Dermatol* 2020; 156: 1086.

*matthewman2021*: Matthewman J, Tadrous M, Mansfield KE, et al. Association of Different Prescribing Patterns for Oral Corticosteroids With Fracture Preventive Care Among Older Adults in the UK and Ontario. *JAMA Dermatology* 2023; 159: 961–9.

*schonmann2020*: Schonmann Y, Mansfield KE, Hayes JF, et al. Atopic Eczema in Adulthood and Risk of Depression and Anxiety: A Population-Based Cohort Study. *The Journal of Allergy and Clinical Immunology: In Practice* 2020; 8: 248-257.e16.

*silverwood2018*: Silverwood RJ, Mansfield KE, Mulick A, et al. Atopic eczema in adulthood and mortality: UK population-based cohort study, 1998-2016. *J Allergy Clin Immunol* 2021; 147: 1753–63

### Supplementary Figure 3: Histograms of age at index date

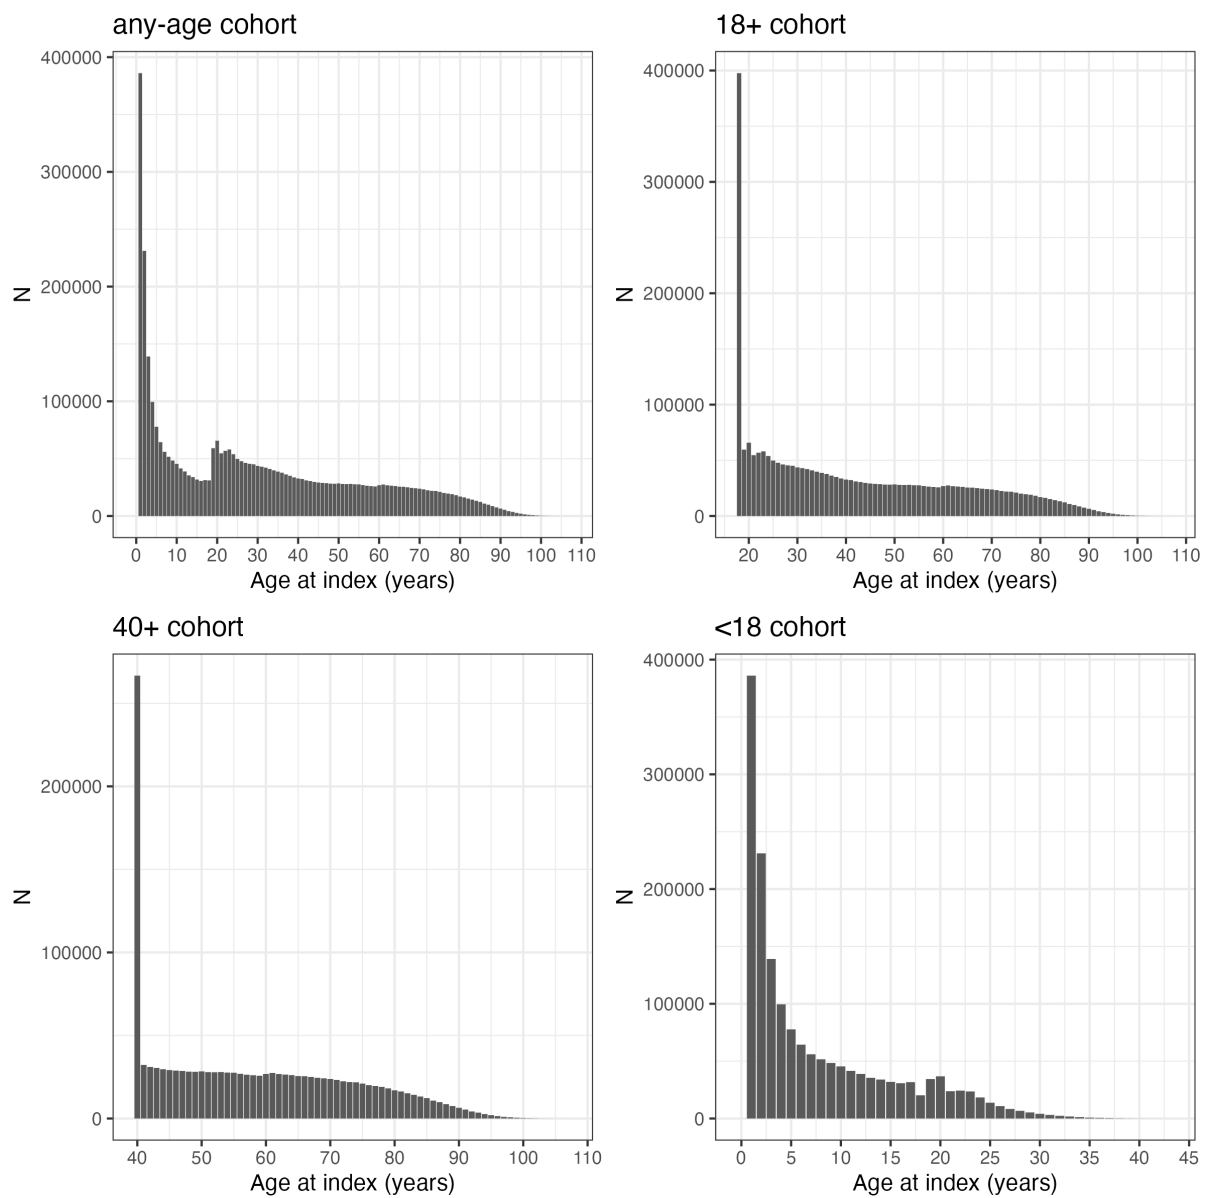

Supplementary Figure 3: Histograms showing the distribution of age at index date (in years) for the any-age cohort (top left), the 18+ cohort (top right), the 40+ cohort (bottom left) and the <18 cohort (bottom right).  $N$  denotes the number of individuals within each one-year age bin.

## Supplementary Figure 4: Histograms of follow-up time

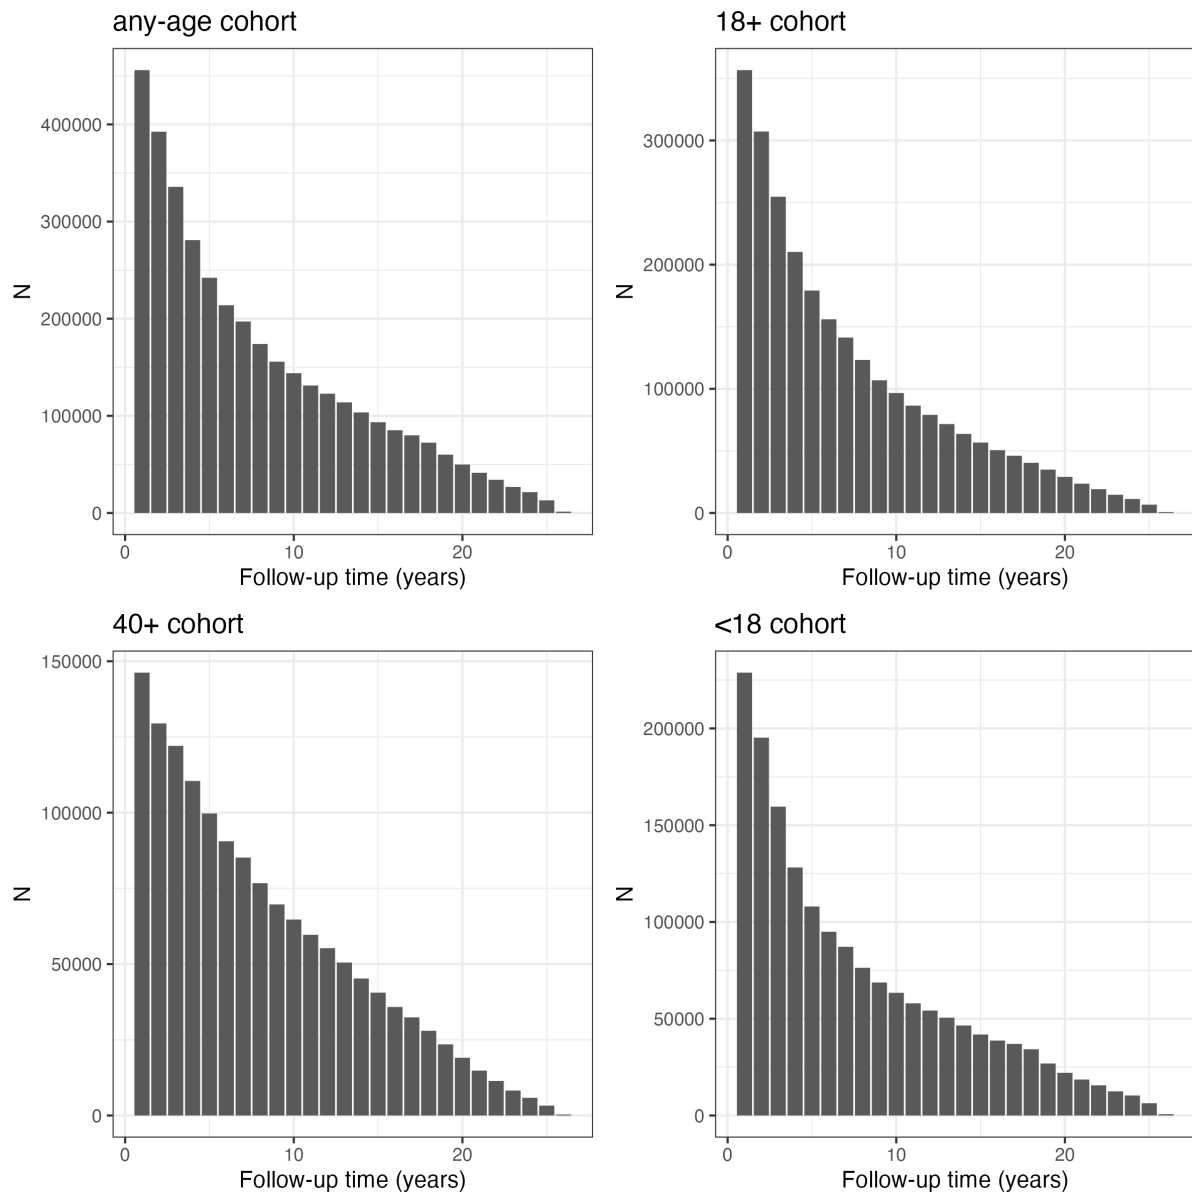

Supplementary Figure 4: Histograms showing the distribution of follow-up time (in years) for the any-age cohort (top left), the 18+ cohort (top right), the 40+ cohort (bottom left) and the <18 cohort (bottom right). N denotes the number of individuals within each one-year follow-up time bin.
